# Supplementary material for: Error-correcting barcoded primers for pyrosequencing hundreds of samples in multiplex
Source: Springer Nature journal article supplement (doi:10.1038/nmeth.1184), 2008-02-10
Supplement: 41592_2008_BFnmeth1184_MOESM291_ESM.pdf [file 41592_2008_BFnmeth1184_MOESM291_ESM.pdf]

# **Error-correcting barcoded primers for pyrosequencing hundreds of samples in multiplex**

Micah Hamady, Jeffrey J Walker, J Kirk Harris, Nicholas J Gold & Rob Knight

## **Supplementary figure and text:**

Supplementary Figure 1: Taxonomic distributions of bacteria in each of the major sample types

Supplementary Data 1: List of error-correcting barcodes and primers

Supplementary Methods

*Note: Supplementary Data 2 is available on the Nature Methods website.*

**Supplementary Figure 1: Taxonomic distributions of bacteria in each of the major sample types**

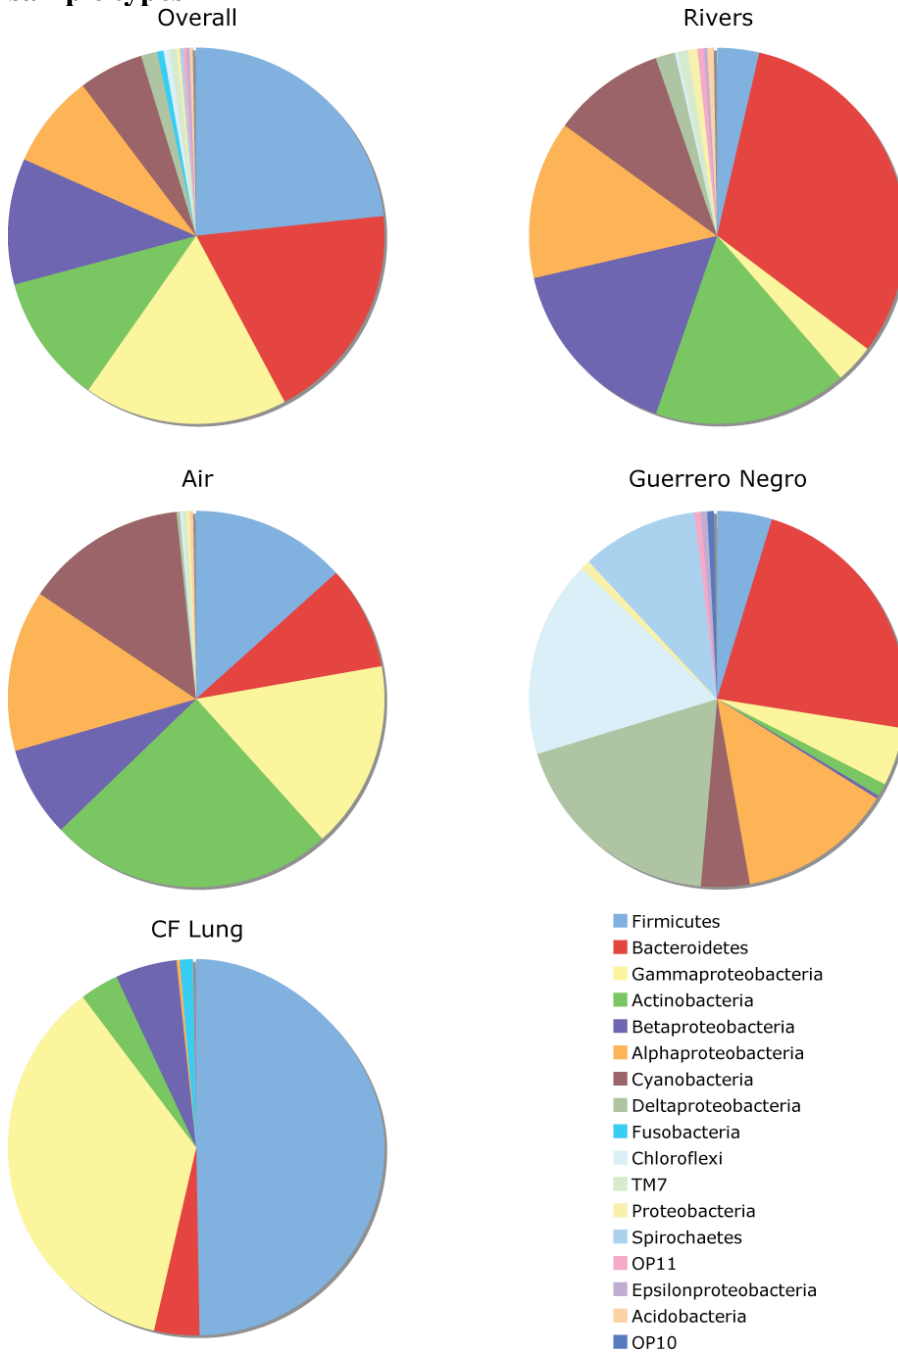

These pie charts show the distributions of the different divisions of bacteria in each of the major classes of samples. As expected, the samples differ dramatically from one another: for example, the CF lung samples are dominated by Firmicutes and gamma-Proteobacteria (mostly *Pseudomonas*), whereas the Guerrero Negro microbial mat is dominated by Bacteroidetes, Proteobacteria, and Chloroflexi. These results indicate that the pyrosequencing reads provide data comparable to that obtained by traditional approaches.

**Supplementary Data 1: List of error-correcting barcodes and primers.** The first 286 of these were used in the study.

For each sample, we amplified the 16S rRNA gene using the composite forward primer 5'-GCCTTGCCAGCCCGCTCAGT**AGAGTTTGATCCTGGCTCAG**-3': the underlined sequence is 454 Life Sciences® primer B, and the bold sequence is the broadly conserved bacterial primer 27F. We inserted a two-base linker sequence ('TC') that was not observed in >250,000 aligned 16S rRNA sequences between the 454 primer B and 27F to help mitigate any effect the composite primer might have on PCR efficiency. The reverse primer was

5'-GCCTCCCTCGCGCCATCAGNNNNNNNNNCAT**TGCTGCCTCCCGTAGGAGT**-3': the underlined sequence is 454 Life Sciences' primer A, and the bold sequence is the broad range bacterial primer 338R. *NNNNNNNN* designates the unique eight-base barcode used to tag each PCR product (see below), with 'CA' inserted as a linker between the barcode and rRNA primer.

| <b>Barcode</b> | <b>Primer</b>                                     |
|----------------|---------------------------------------------------|
| AACCAACC       | GCCTCCCTCGCGCCATCAGAACCAACCCATGCTGCCTCCCGTAGGAGT  |
| AACCAAGG       | GCCTCCCTCGCGCCATCAGAACCAAGGCATGCTGCCTCCCGTAGGAGT  |
| AACCATCG       | GCCTCCCTCGCGCCATCAGAACCATCGCATGCTGCCTCCCGTAGGAGT  |
| AACCATGC       | GCCTCCCTCGCGCCATCAGAACCATGCCATGCTGCCTCCCGTAGGAGT  |
| AACCGCAT       | GCCTCCCTCGCGCCATCAGAACCGCATCATGCTGCCTCCCGTAGGAGT  |
| AACCGTA        | GCCTCCCTCGCGCCATCAGAACCGTACATGCTGCCTCCCGTAGGAGT   |
| AACCGGAA       | GCCTCCCTCGCGCCATCAGAACCGAACATGCTGCCTCCCGTAGGAGT   |
| AACCGGTT       | GCCTCCCTCGCGCCATCAGAACCGGTTTCATGCTGCCTCCCGTAGGAGT |
| AACCTACG       | GCCTCCCTCGCGCCATCAGAACCTACGCATGCTGCCTCCCGTAGGAGT  |
| AACCTAGC       | GCCTCCCTCGCGCCATCAGAACCTAGCCATGCTGCCTCCCGTAGGAGT  |
| AACCTTCC       | GCCTCCCTCGCGCCATCAGAACCTTCCCATGCTGCCTCCCGTAGGAGT  |
| AACCTTGG       | GCCTCCCTCGCGCCATCAGAACCTTGGCATGCTGCCTCCCGTAGGAGT  |
| AACGAACG       | GCCTCCCTCGCGCCATCAGAACGAACGCATGCTGCCTCCCGTAGGAGT  |
| AACGAAGC       | GCCTCCCTCGCGCCATCAGAACGAAGCCATGCTGCCTCCCGTAGGAGT  |
| AACGATCC       | GCCTCCCTCGCGCCATCAGAACGATCCCATGCTGCCTCCCGTAGGAGT  |
| AACGATGG       | GCCTCCCTCGCGCCATCAGAACGATGGCATGCTGCCTCCCGTAGGAGT  |
| AACGCCAT       | GCCTCCCTCGCGCCATCAGAACGCCATCATGCTGCCTCCCGTAGGAGT  |
| AACGCCTA       | GCCTCCCTCGCGCCATCAGAACGCCTACATGCTGCCTCCCGTAGGAGT  |
| AACGCGAA       | GCCTCCCTCGCGCCATCAGAACGCGAACATGCTGCCTCCCGTAGGAGT  |
| AACGCGTT       | GCCTCCCTCGCGCCATCAGAACGCGTTCATGCTGCCTCCCGTAGGAGT  |
| AACGGCAA       | GCCTCCCTCGCGCCATCAGAACGGCAACATGCTGCCTCCCGTAGGAGT  |
| AACGGCTT       | GCCTCCCTCGCGCCATCAGAACGGCTTCATGCTGCCTCCCGTAGGAGT  |
| AACGTACC       | GCCTCCCTCGCGCCATCAGAACGTACCCATGCTGCCTCCCGTAGGAGT  |
| AACGTAGG       | GCCTCCCTCGCGCCATCAGAACGTAGGCATGCTGCCTCCCGTAGGAGT  |
| AACGTTCC       | GCCTCCCTCGCGCCATCAGAACGTTCCCATGCTGCCTCCCGTAGGAGT  |
| AACGTTGC       | GCCTCCCTCGCGCCATCAGAACGTTGCCATGCTGCCTCCCGTAGGAGT  |
| AAGCAACG       | GCCTCCCTCGCGCCATCAGAAGCAACGCATGCTGCCTCCCGTAGGAGT  |
| AAGCAAGC       | GCCTCCCTCGCGCCATCAGAAGCAAGCCATGCTGCCTCCCGTAGGAGT  |
| AAGCATCC       | GCCTCCCTCGCGCCATCAGAAGCATCCCATGCTGCCTCCCGTAGGAGT  |
| AAGCATGG       | GCCTCCCTCGCGCCATCAGAAGCATGGCATGCTGCCTCCCGTAGGAGT  |
| AAGCCGAA       | GCCTCCCTCGCGCCATCAGAAGCCGAACATGCTGCCTCCCGTAGGAGT  |

AAGCCGTT GCCTCCCTCGCGCCATCAGAAGCCGTTTCATGCTGCCTCCCGTAGGAGT  
AAGCGCAA GCCTCCCTCGCGCCATCAGAAGCGCAACATGCTGCCTCCCGTAGGAGT  
AAGCGCTT GCCTCCCTCGCGCCATCAGAAGCGCTTCATGCTGCCTCCCGTAGGAGT  
AAGCGGAT GCCTCCCTCGCGCCATCAGAAGCGGATCATGCTGCCTCCCGTAGGAGT  
AAGCGGTA GCCTCCCTCGCGCCATCAGAAGCGGTACATGCTGCCTCCCGTAGGAGT  
AAGCTACC GCCTCCCTCGCGCCATCAGAAGCTACCCATGCTGCCTCCCGTAGGAGT  
AAGCTAGG GCCTCCCTCGCGCCATCAGAAGCTAGGCATGCTGCCTCCCGTAGGAGT  
AAGCTTCG GCCTCCCTCGCGCCATCAGAAGCTTCGCATGCTGCCTCCCGTAGGAGT  
AAGCTTGC GCCTCCCTCGCGCCATCAGAAGCTTGCCATGCTGCCTCCCGTAGGAGT  
AAGGAACC GCCTCCCTCGCGCCATCAGAAGGAACCCATGCTGCCTCCCGTAGGAGT  
AAGGAAGG GCCTCCCTCGCGCCATCAGAAGGAAGGCATGCTGCCTCCCGTAGGAGT  
AAGGATCG GCCTCCCTCGCGCCATCAGAAGGATCGCATGCTGCCTCCCGTAGGAGT  
AAGGATGC GCCTCCCTCGCGCCATCAGAAGGATGCCATGCTGCCTCCCGTAGGAGT  
AAGGCCAA GCCTCCCTCGCGCCATCAGAAGGCCAACATGCTGCCTCCCGTAGGAGT  
AAGGCCTT GCCTCCCTCGCGCCATCAGAAGGCCTTCATGCTGCCTCCCGTAGGAGT  
AAGGCGAT GCCTCCCTCGCGCCATCAGAAGGCGATCATGCTGCCTCCCGTAGGAGT  
AAGGCGTA GCCTCCCTCGCGCCATCAGAAGGCGTACATGCTGCCTCCCGTAGGAGT  
AAGGTACG GCCTCCCTCGCGCCATCAGAAGGTACGCATGCTGCCTCCCGTAGGAGT  
AAGGTAGC GCCTCCCTCGCGCCATCAGAAGGTAGCCATGCTGCCTCCCGTAGGAGT  
AAGGTTCC GCCTCCCTCGCGCCATCAGAAGGTTCCCATGCTGCCTCCCGTAGGAGT  
AAGGTTGG GCCTCCCTCGCGCCATCAGAAGGTTGGCATGCTGCCTCCCGTAGGAGT  
AATACCGC GCCTCCCTCGCGCCATCAGAATACCGCCATGCTGCCTCCCGTAGGAGT  
AATACGCC GCCTCCCTCGCGCCATCAGAATACGCCCATGCTGCCTCCCGTAGGAGT  
AATAGCGG GCCTCCCTCGCGCCATCAGAATAGCGGCATGCTGCCTCCCGTAGGAGT  
AATAGGCG GCCTCCCTCGCGCCATCAGAATAGGCGCATGCTGCCTCCCGTAGGAGT  
AATTCCGG GCCTCCCTCGCGCCATCAGAATTCCGGCATGCTGCCTCCCGTAGGAGT  
AATTCGCG GCCTCCCTCGCGCCATCAGAATTGCGCATGCTGCCTCCCGTAGGAGT  
AATTCGGC GCCTCCCTCGCGCCATCAGAATTGCGCCATGCTGCCTCCCGTAGGAGT  
AATTGCCG GCCTCCCTCGCGCCATCAGAATTGCCGCATGCTGCCTCCCGTAGGAGT  
AATTGCGC GCCTCCCTCGCGCCATCAGAATTGCGCCATGCTGCCTCCCGTAGGAGT  
AATTGGCC GCCTCCCTCGCGCCATCAGAATTGGCCCATGCTGCCTCCCGTAGGAGT  
ACACACAC GCCTCCCTCGCGCCATCAGACACACACCATGCTGCCTCCCGTAGGAGT  
ACACACTG GCCTCCCTCGCGCCATCAGACACACTGCATGCTGCCTCCCGTAGGAGT  
ACACAGAG GCCTCCCTCGCGCCATCAGACACAGAGCATGCTGCCTCCCGTAGGAGT  
ACACAGTC GCCTCCCTCGCGCCATCAGACACAGTCCATGCTGCCTCCCGTAGGAGT  
ACACCACA GCCTCCCTCGCGCCATCAGACACCACACATGCTGCCTCCCGTAGGAGT  
ACACCAGT GCCTCCCTCGCGCCATCAGACACCAGTCATGCTGCCTCCCGTAGGAGT  
ACACCTCT GCCTCCCTCGCGCCATCAGACACCTCTCATGCTGCCTCCCGTAGGAGT  
ACACCTGA GCCTCCCTCGCGCCATCAGACACCTGACATGCTGCCTCCCGTAGGAGT  
ACACGACT GCCTCCCTCGCGCCATCAGACACGACTCATGCTGCCTCCCGTAGGAGT  
ACACGAGA GCCTCCCTCGCGCCATCAGACACGAGACATGCTGCCTCCCGTAGGAGT  
ACACGTCA GCCTCCCTCGCGCCATCAGACACGTACATGCTGCCTCCCGTAGGAGT  
ACACGTGT GCCTCCCTCGCGCCATCAGACACGTGTCATGCTGCCTCCCGTAGGAGT  
ACACTCAG GCCTCCCTCGCGCCATCAGACACTCAGCATGCTGCCTCCCGTAGGAGT  
ACACTCTC GCCTCCCTCGCGCCATCAGACACTCTCCATGCTGCCTCCCGTAGGAGT  
ACACTGAC GCCTCCCTCGCGCCATCAGACACTGACCATGCTGCCTCCCGTAGGAGT  
ACACTGTG GCCTCCCTCGCGCCATCAGACACTGTGCATGCTGCCTCCCGTAGGAGT  
ACAGACAG GCCTCCCTCGCGCCATCAGACAGACAGCATGCTGCCTCCCGTAGGAGT  
ACAGACTC GCCTCCCTCGCGCCATCAGACAGACTCCATGCTGCCTCCCGTAGGAGT

ACAGAGAC GCCTCCCTCGCGCCATCAGACAGAGACCATGCTGCCTCCCGTAGGAGT  
ACAGAGTG GCCTCCCTCGCGCCATCAGACAGAGTGCATGCTGCCTCCCGTAGGAGT  
ACAGCACT GCCTCCCTCGCGCCATCAGACAGCACTCATGCTGCCTCCCGTAGGAGT  
ACAGCAGA GCCTCCCTCGCGCCATCAGACAGCAGACATGCTGCCTCCCGTAGGAGT  
ACAGCTCA GCCTCCCTCGCGCCATCAGACAGCTCACATGCTGCCTCCCGTAGGAGT  
ACAGCTGT GCCTCCCTCGCGCCATCAGACAGCTGTCATGCTGCCTCCCGTAGGAGT  
ACAGGACA GCCTCCCTCGCGCCATCAGACAGGACACATGCTGCCTCCCGTAGGAGT  
ACAGGAGT GCCTCCCTCGCGCCATCAGACAGGAGTCATGCTGCCTCCCGTAGGAGT  
ACAGGTCT GCCTCCCTCGCGCCATCAGACAGGTCTCATGCTGCCTCCCGTAGGAGT  
ACAGGTGA GCCTCCCTCGCGCCATCAGACAGGTGACATGCTGCCTCCCGTAGGAGT  
ACAGTCAC GCCTCCCTCGCGCCATCAGACAGTCACCATGCTGCCTCCCGTAGGAGT  
ACAGTCTG GCCTCCCTCGCGCCATCAGACAGTCTGCATGCTGCCTCCCGTAGGAGT  
ACAGTGAG GCCTCCCTCGCGCCATCAGACAGTGAGCATGCTGCCTCCCGTAGGAGT  
ACAGTGTC GCCTCCCTCGCGCCATCAGACAGTGTCCATGCTGCCTCCCGTAGGAGT  
ACCAACCA GCCTCCCTCGCGCCATCAGACCAACCACATGCTGCCTCCCGTAGGAGT  
ACCAACGT GCCTCCCTCGCGCCATCAGACCAACGTCATGCTGCCTCCCGTAGGAGT  
ACCAAGCT GCCTCCCTCGCGCCATCAGACCAAGCTCATGCTGCCTCCCGTAGGAGT  
ACCAAGGA GCCTCCCTCGCGCCATCAGACCAAGGACATGCTGCCTCCCGTAGGAGT  
ACCACAAC GCCTCCCTCGCGCCATCAGACCAACCACATGCTGCCTCCCGTAGGAGT  
ACCACATG GCCTCCCTCGCGCCATCAGACCAACATGCATGCTGCCTCCCGTAGGAGT  
ACCACTAG GCCTCCCTCGCGCCATCAGACCACTAGCATGCTGCCTCCCGTAGGAGT  
ACCACTTC GCCTCCCTCGCGCCATCAGACCACTTCCATGCTGCCTCCCGTAGGAGT  
ACCAGAAG GCCTCCCTCGCGCCATCAGACCAAGAAGCATGCTGCCTCCCGTAGGAGT  
ACCAGATC GCCTCCCTCGCGCCATCAGACCAAGATCCATGCTGCCTCCCGTAGGAGT  
ACCAGTAC GCCTCCCTCGCGCCATCAGACCAAGTACCATGCTGCCTCCCGTAGGAGT  
ACCAGTTG GCCTCCCTCGCGCCATCAGACCAAGTTGCATGCTGCCTCCCGTAGGAGT  
ACCATCCT GCCTCCCTCGCGCCATCAGACCATCCTCATGCTGCCTCCCGTAGGAGT  
ACCATCGA GCCTCCCTCGCGCCATCAGACCATCGACATGCTGCCTCCCGTAGGAGT  
ACCATGCA GCCTCCCTCGCGCCATCAGACCATGCACATGCTGCCTCCCGTAGGAGT  
ACCATGGT GCCTCCCTCGCGCCATCAGACCATGGTCATGCTGCCTCCCGTAGGAGT  
ACCTACCT GCCTCCCTCGCGCCATCAGACCTACCTCATGCTGCCTCCCGTAGGAGT  
ACCTACGA GCCTCCCTCGCGCCATCAGACCTACGACATGCTGCCTCCCGTAGGAGT  
ACCTAGCA GCCTCCCTCGCGCCATCAGACCTAGCACATGCTGCCTCCCGTAGGAGT  
ACCTAGGT GCCTCCCTCGCGCCATCAGACCTAGGTCATGCTGCCTCCCGTAGGAGT  
ACCTCAAG GCCTCCCTCGCGCCATCAGACCTCAAGCATGCTGCCTCCCGTAGGAGT  
ACCTCATC GCCTCCCTCGCGCCATCAGACCTCATCCATGCTGCCTCCCGTAGGAGT  
ACCTCTAC GCCTCCCTCGCGCCATCAGACCTCTACCATGCTGCCTCCCGTAGGAGT  
ACCTCTTG GCCTCCCTCGCGCCATCAGACCTCTTGATGCTGCCTCCCGTAGGAGT  
ACCTGAAC GCCTCCCTCGCGCCATCAGACCTGAACCATGCTGCCTCCCGTAGGAGT  
ACCTGATG GCCTCCCTCGCGCCATCAGACCTGATGCATGCTGCCTCCCGTAGGAGT  
ACCTGTAG GCCTCCCTCGCGCCATCAGACCTGTAGCATGCTGCCTCCCGTAGGAGT  
ACCTGTTC GCCTCCCTCGCGCCATCAGACCTGTTCCATGCTGCCTCCCGTAGGAGT  
ACCTTCCA GCCTCCCTCGCGCCATCAGACCTTCCACATGCTGCCTCCCGTAGGAGT  
ACCTTCGT GCCTCCCTCGCGCCATCAGACCTTCGTATGCTGCCTCCCGTAGGAGT  
ACCTTGCT GCCTCCCTCGCGCCATCAGACCTTGCTCATGCTGCCTCCCGTAGGAGT  
ACCTTGGA GCCTCCCTCGCGCCATCAGACCTTGGACATGCTGCCTCCCGTAGGAGT  
ACGAACCT GCCTCCCTCGCGCCATCAGACGAACCTCATGCTGCCTCCCGTAGGAGT  
ACGAACGA GCCTCCCTCGCGCCATCAGACGAACGACATGCTGCCTCCCGTAGGAGT  
ACGAAGCA GCCTCCCTCGCGCCATCAGACGAAGCACATGCTGCCTCCCGTAGGAGT

ACGAAGGT GCCTCCCTCGCGCCATCAGACGAAGGTCATGCTGCCTCCCGTAGGAGT  
ACGACAAG GCCTCCCTCGCGCCATCAGACGACAAGCATGCTGCCTCCCGTAGGAGT  
ACGACATC GCCTCCCTCGCGCCATCAGACGACATCCATGCTGCCTCCCGTAGGAGT  
ACGACTAC GCCTCCCTCGCGCCATCAGACGACTACCATGCTGCCTCCCGTAGGAGT  
ACGACTTG GCCTCCCTCGCGCCATCAGACGACTTGCATGCTGCCTCCCGTAGGAGT  
ACGAGAAC GCCTCCCTCGCGCCATCAGACGAGAACCATGCTGCCTCCCGTAGGAGT  
ACGAGATG GCCTCCCTCGCGCCATCAGACGAGATGCATGCTGCCTCCCGTAGGAGT  
ACGAGTAG GCCTCCCTCGCGCCATCAGACGAGTAGCATGCTGCCTCCCGTAGGAGT  
ACGAGTTC GCCTCCCTCGCGCCATCAGACGAGTTCCATGCTGCCTCCCGTAGGAGT  
ACGATCCA GCCTCCCTCGCGCCATCAGACGATCCACATGCTGCCTCCCGTAGGAGT  
ACGATCGT GCCTCCCTCGCGCCATCAGACGATCGTCATGCTGCCTCCCGTAGGAGT  
ACGATGCT GCCTCCCTCGCGCCATCAGACGATGCTCATGCTGCCTCCCGTAGGAGT  
ACGATGGA GCCTCCCTCGCGCCATCAGACGATGGACATGCTGCCTCCCGTAGGAGT  
ACGTACCA GCCTCCCTCGCGCCATCAGACGTACCACATGCTGCCTCCCGTAGGAGT  
ACGTACGT GCCTCCCTCGCGCCATCAGACGTACGTCATGCTGCCTCCCGTAGGAGT  
ACGTAGCT GCCTCCCTCGCGCCATCAGACGTAGCTCATGCTGCCTCCCGTAGGAGT  
ACGTAGGA GCCTCCCTCGCGCCATCAGACGTAGGACATGCTGCCTCCCGTAGGAGT  
ACGTCAAC GCCTCCCTCGCGCCATCAGACGTCAACCATGCTGCCTCCCGTAGGAGT  
ACGTCATG GCCTCCCTCGCGCCATCAGACGTATGCATGCTGCCTCCCGTAGGAGT  
ACGTCTAG GCCTCCCTCGCGCCATCAGACGTCTAGCATGCTGCCTCCCGTAGGAGT  
ACGTCTTC GCCTCCCTCGCGCCATCAGACGTCTCCATGCTGCCTCCCGTAGGAGT  
ACGTGAAG GCCTCCCTCGCGCCATCAGACGTGAAGCATGCTGCCTCCCGTAGGAGT  
ACGTGATC GCCTCCCTCGCGCCATCAGACGTGATCCATGCTGCCTCCCGTAGGAGT  
ACGTGTAC GCCTCCCTCGCGCCATCAGACGTGTACCATGCTGCCTCCCGTAGGAGT  
ACGTGTTG GCCTCCCTCGCGCCATCAGACGTGTTGCATGCTGCCTCCCGTAGGAGT  
ACGTTCTT GCCTCCCTCGCGCCATCAGACGTTCCTCATGCTGCCTCCCGTAGGAGT  
ACGTTCGA GCCTCCCTCGCGCCATCAGACGTTCGACATGCTGCCTCCCGTAGGAGT  
ACGTTGCA GCCTCCCTCGCGCCATCAGACGTTCACATGCTGCCTCCCGTAGGAGT  
ACGTTGGT GCCTCCCTCGCGCCATCAGACGTGGTTCATGCTGCCTCCCGTAGGAGT  
ACTCACAG GCCTCCCTCGCGCCATCAGACTCACAGCATGCTGCCTCCCGTAGGAGT  
ACTACTC GCCTCCCTCGCGCCATCAGACTCACTCCATGCTGCCTCCCGTAGGAGT  
ACTCAGAC GCCTCCCTCGCGCCATCAGACTCAGACCATGCTGCCTCCCGTAGGAGT  
ACTCAGTG GCCTCCCTCGCGCCATCAGACTCAGTGCATGCTGCCTCCCGTAGGAGT  
ACTCCACT GCCTCCCTCGCGCCATCAGACTCCACTCATGCTGCCTCCCGTAGGAGT  
ACTCCAGA GCCTCCCTCGCGCCATCAGACTCCAGACATGCTGCCTCCCGTAGGAGT  
ACTCCTCA GCCTCCCTCGCGCCATCAGACTCCTCACATGCTGCCTCCCGTAGGAGT  
ACTCCTGT GCCTCCCTCGCGCCATCAGACTCCTGTCATGCTGCCTCCCGTAGGAGT  
ACTCGACA GCCTCCCTCGCGCCATCAGACTCGACACATGCTGCCTCCCGTAGGAGT  
ACTCGAGT GCCTCCCTCGCGCCATCAGACTCGAGTCATGCTGCCTCCCGTAGGAGT  
ACTCGTCT GCCTCCCTCGCGCCATCAGACTCGTCTCATGCTGCCTCCCGTAGGAGT  
ACTCGTGA GCCTCCCTCGCGCCATCAGACTCGTGACATGCTGCCTCCCGTAGGAGT  
ACTCTCAC GCCTCCCTCGCGCCATCAGACTCTCACCATGCTGCCTCCCGTAGGAGT  
ACTCTCTG GCCTCCCTCGCGCCATCAGACTCTTGCATGCTGCCTCCCGTAGGAGT  
ACTCTGAG GCCTCCCTCGCGCCATCAGACTCTGAGCATGCTGCCTCCCGTAGGAGT  
ACTCTGTC GCCTCCCTCGCGCCATCAGACTCTGTCCATGCTGCCTCCCGTAGGAGT  
ACTGACAC GCCTCCCTCGCGCCATCAGACTGACACCATGCTGCCTCCCGTAGGAGT  
ACTGACTG GCCTCCCTCGCGCCATCAGACTGACTGCATGCTGCCTCCCGTAGGAGT  
ACTGAGAG GCCTCCCTCGCGCCATCAGACTGAGAGCATGCTGCCTCCCGTAGGAGT  
ACTGAGTC GCCTCCCTCGCGCCATCAGACTGAGTCCATGCTGCCTCCCGTAGGAGT

ACTGCACA GCCTCCCTCGCGCCATCAGACTGCACACATGCTGCCTCCCGTAGGAGT  
ACTGCAGT GCCTCCCTCGCGCCATCAGACTGCAGTCATGCTGCCTCCCGTAGGAGT  
ACTGCTCT GCCTCCCTCGCGCCATCAGACTGCTCTCATGCTGCCTCCCGTAGGAGT  
ACTGCTGA GCCTCCCTCGCGCCATCAGACTGCTGACATGCTGCCTCCCGTAGGAGT  
ACTGGACT GCCTCCCTCGCGCCATCAGACTGGACTCATGCTGCCTCCCGTAGGAGT  
ACTGGAGA GCCTCCCTCGCGCCATCAGACTGGAGACATGCTGCCTCCCGTAGGAGT  
ACTGGTCA GCCTCCCTCGCGCCATCAGACTGGTACATGCTGCCTCCCGTAGGAGT  
ACTGGTGT GCCTCCCTCGCGCCATCAGACTGGTGTGTCATGCTGCCTCCCGTAGGAGT  
ACTGTGAG GCCTCCCTCGCGCCATCAGACTGTCAGCATGCTGCCTCCCGTAGGAGT  
ACTGTCTC GCCTCCCTCGCGCCATCAGACTGTCTCCATGCTGCCTCCCGTAGGAGT  
ACTGTGAC GCCTCCCTCGCGCCATCAGACTGTGACCATGCTGCCTCCCGTAGGAGT  
ACTGTGTG GCCTCCCTCGCGCCATCAGACTGTGTGTCATGCTGCCTCCCGTAGGAGT  
AGACACAG GCCTCCCTCGCGCCATCAGAGACACAGCATGCTGCCTCCCGTAGGAGT  
AGACACTC GCCTCCCTCGCGCCATCAGAGACACTCCATGCTGCCTCCCGTAGGAGT  
AGACAGAC GCCTCCCTCGCGCCATCAGAGACAGACCATGCTGCCTCCCGTAGGAGT  
AGACAGTG GCCTCCCTCGCGCCATCAGAGACAGTGCATGCTGCCTCCCGTAGGAGT  
AGACCACT GCCTCCCTCGCGCCATCAGAGACCACTCATGCTGCCTCCCGTAGGAGT  
AGACCAGA GCCTCCCTCGCGCCATCAGAGACCAGACATGCTGCCTCCCGTAGGAGT  
AGACCTCA GCCTCCCTCGCGCCATCAGAGACCTCACATGCTGCCTCCCGTAGGAGT  
AGACCTGT GCCTCCCTCGCGCCATCAGAGACCTGTCATGCTGCCTCCCGTAGGAGT  
AGACGACA GCCTCCCTCGCGCCATCAGAGACGACACATGCTGCCTCCCGTAGGAGT  
AGACGAGT GCCTCCCTCGCGCCATCAGAGACGAGTCATGCTGCCTCCCGTAGGAGT  
AGACGTCT GCCTCCCTCGCGCCATCAGAGACGTCTCATGCTGCCTCCCGTAGGAGT  
AGACGTGA GCCTCCCTCGCGCCATCAGAGACGTGACATGCTGCCTCCCGTAGGAGT  
AGACTCAC GCCTCCCTCGCGCCATCAGAGACTCACCATGCTGCCTCCCGTAGGAGT  
AGACTCTG GCCTCCCTCGCGCCATCAGAGACTCTGCATGCTGCCTCCCGTAGGAGT  
AGACTGAG GCCTCCCTCGCGCCATCAGAGACTGAGCATGCTGCCTCCCGTAGGAGT  
AGACTGTC GCCTCCCTCGCGCCATCAGAGACTGTCCATGCTGCCTCCCGTAGGAGT  
AGAGACAC GCCTCCCTCGCGCCATCAGAGAGACACCATGCTGCCTCCCGTAGGAGT  
AGAGACTG GCCTCCCTCGCGCCATCAGAGAGACTGCATGCTGCCTCCCGTAGGAGT  
AGAGAGAG GCCTCCCTCGCGCCATCAGAGAGAGAGCATGCTGCCTCCCGTAGGAGT  
AGAGAGTC GCCTCCCTCGCGCCATCAGAGAGAGTCCATGCTGCCTCCCGTAGGAGT  
AGAGCACA GCCTCCCTCGCGCCATCAGAGAGCACACATGCTGCCTCCCGTAGGAGT  
AGAGCAGT GCCTCCCTCGCGCCATCAGAGAGCAGTCATGCTGCCTCCCGTAGGAGT  
AGAGCTCT GCCTCCCTCGCGCCATCAGAGAGCTCTCATGCTGCCTCCCGTAGGAGT  
AGAGCTGA GCCTCCCTCGCGCCATCAGAGAGCTGACATGCTGCCTCCCGTAGGAGT  
AGAGGACT GCCTCCCTCGCGCCATCAGAGAGGACTCATGCTGCCTCCCGTAGGAGT  
AGAGGAGA GCCTCCCTCGCGCCATCAGAGAGGAGACATGCTGCCTCCCGTAGGAGT  
AGAGGTCA GCCTCCCTCGCGCCATCAGAGAGGTACATGCTGCCTCCCGTAGGAGT  
AGAGGTGT GCCTCCCTCGCGCCATCAGAGAGGTGTCATGCTGCCTCCCGTAGGAGT  
AGAGTCAG GCCTCCCTCGCGCCATCAGAGAGTTCAGCATGCTGCCTCCCGTAGGAGT  
AGAGTCTC GCCTCCCTCGCGCCATCAGAGAGTCTCCATGCTGCCTCCCGTAGGAGT  
AGAGTGAC GCCTCCCTCGCGCCATCAGAGAGTGACCATGCTGCCTCCCGTAGGAGT  
AGAGTGTG GCCTCCCTCGCGCCATCAGAGAGTGTGTCATGCTGCCTCCCGTAGGAGT  
AGCAACCT GCCTCCCTCGCGCCATCAGAGCAACCTCATGCTGCCTCCCGTAGGAGT  
AGCAACGA GCCTCCCTCGCGCCATCAGAGCAACGACATGCTGCCTCCCGTAGGAGT  
AGCAAGCA GCCTCCCTCGCGCCATCAGAGCAAGCACATGCTGCCTCCCGTAGGAGT  
AGCAAGGT GCCTCCCTCGCGCCATCAGAGCAAGGTCATGCTGCCTCCCGTAGGAGT  
AGCACAAG GCCTCCCTCGCGCCATCAGAGACAAGCATGCTGCCTCCCGTAGGAGT

AGCACATC GCCTCCCTCGCGCCATCAGAGCACATCCATGCTGCCTCCCGTAGGAGT  
AGCACTAC GCCTCCCTCGCGCCATCAGAGCACTACCATGCTGCCTCCCGTAGGAGT  
AGCACTTG GCCTCCCTCGCGCCATCAGAGCACTTGCATGCTGCCTCCCGTAGGAGT  
AGCAGAAC GCCTCCCTCGCGCCATCAGAGCAGAACCATGCTGCCTCCCGTAGGAGT  
AGCAGATG GCCTCCCTCGCGCCATCAGAGCAGATGCATGCTGCCTCCCGTAGGAGT  
AGCAGTAG GCCTCCCTCGCGCCATCAGAGCAGTAGCATGCTGCCTCCCGTAGGAGT  
AGCAGTTC GCCTCCCTCGCGCCATCAGAGCAGTTCCATGCTGCCTCCCGTAGGAGT  
AGCATCCA GCCTCCCTCGCGCCATCAGAGCATCCACATGCTGCCTCCCGTAGGAGT  
AGCATCGT GCCTCCCTCGCGCCATCAGAGCATCGTCATGCTGCCTCCCGTAGGAGT  
AGCATGCT GCCTCCCTCGCGCCATCAGAGCATGCTCATGCTGCCTCCCGTAGGAGT  
AGCATGGA GCCTCCCTCGCGCCATCAGAGCATGGACATGCTGCCTCCCGTAGGAGT  
AGTACCA GCCTCCCTCGCGCCATCAGAGCTACCACATGCTGCCTCCCGTAGGAGT  
AGTACGT GCCTCCCTCGCGCCATCAGAGCTACGTCATGCTGCCTCCCGTAGGAGT  
AGTAGCT GCCTCCCTCGCGCCATCAGAGCTAGCTCATGCTGCCTCCCGTAGGAGT  
AGTAGGA GCCTCCCTCGCGCCATCAGAGCTAGGACATGCTGCCTCCCGTAGGAGT  
AGTCAAC GCCTCCCTCGCGCCATCAGAGCTCAACCATGCTGCCTCCCGTAGGAGT  
AGTCATG GCCTCCCTCGCGCCATCAGAGCTCATGCATGCTGCCTCCCGTAGGAGT  
AGTCTAG GCCTCCCTCGCGCCATCAGAGCTTAGCATGCTGCCTCCCGTAGGAGT  
AGTCTTC GCCTCCCTCGCGCCATCAGAGCTTCCATGCTGCCTCCCGTAGGAGT  
AGTGAAG GCCTCCCTCGCGCCATCAGAGCTGAAGCATGCTGCCTCCCGTAGGAGT  
AGTGATC GCCTCCCTCGCGCCATCAGAGCTGATCCATGCTGCCTCCCGTAGGAGT  
AGTGTAC GCCTCCCTCGCGCCATCAGAGCTGTACCATGCTGCCTCCCGTAGGAGT  
AGTGTTG GCCTCCCTCGCGCCATCAGAGCTGTTGCATGCTGCCTCCCGTAGGAGT  
AGTTTCT GCCTCCCTCGCGCCATCAGAGCTTCTCATGCTGCCTCCCGTAGGAGT  
AGTTCGA GCCTCCCTCGCGCCATCAGAGCTTCGACATGCTGCCTCCCGTAGGAGT  
AGTTGCA GCCTCCCTCGCGCCATCAGAGCTTGACATGCTGCCTCCCGTAGGAGT  
AGTTGGT GCCTCCCTCGCGCCATCAGAGCTTGGTCATGCTGCCTCCCGTAGGAGT  
AGGAACCA GCCTCCCTCGCGCCATCAGAGGAACACATGCTGCCTCCCGTAGGAGT  
AGGAACGT GCCTCCCTCGCGCCATCAGAGGAACGTCATGCTGCCTCCCGTAGGAGT  
AGGAAGCT GCCTCCCTCGCGCCATCAGAGGAAGCTCATGCTGCCTCCCGTAGGAGT  
AGGAAGGA GCCTCCCTCGCGCCATCAGAGGAAGGACATGCTGCCTCCCGTAGGAGT  
AGGACAAC GCCTCCCTCGCGCCATCAGAGGACAACCATGCTGCCTCCCGTAGGAGT  
AGGACATG GCCTCCCTCGCGCCATCAGAGGACATGCATGCTGCCTCCCGTAGGAGT  
AGGACTAG GCCTCCCTCGCGCCATCAGAGGACTAGCATGCTGCCTCCCGTAGGAGT  
AGGACTTC GCCTCCCTCGCGCCATCAGAGGACTTCCATGCTGCCTCCCGTAGGAGT  
AGGAGAAG GCCTCCCTCGCGCCATCAGAGGAGAAGCATGCTGCCTCCCGTAGGAGT  
AGGAGATC GCCTCCCTCGCGCCATCAGAGGAGATCCATGCTGCCTCCCGTAGGAGT  
AGGAGTAC GCCTCCCTCGCGCCATCAGAGGAGTACCATGCTGCCTCCCGTAGGAGT  
AGGAGTTG GCCTCCCTCGCGCCATCAGAGGAGTTGCATGCTGCCTCCCGTAGGAGT  
AGGATCCT GCCTCCCTCGCGCCATCAGAGGATCCTCATGCTGCCTCCCGTAGGAGT  
AGGATCGA GCCTCCCTCGCGCCATCAGAGGATCGACATGCTGCCTCCCGTAGGAGT  
AGGATGCA GCCTCCCTCGCGCCATCAGAGGATGCACATGCTGCCTCCCGTAGGAGT  
AGGATGGT GCCTCCCTCGCGCCATCAGAGGATGGTCATGCTGCCTCCCGTAGGAGT  
AGGTACCT GCCTCCCTCGCGCCATCAGAGGTACCTCATGCTGCCTCCCGTAGGAGT  
AGGTACGA GCCTCCCTCGCGCCATCAGAGGTACGACATGCTGCCTCCCGTAGGAGT  
AGGTAGCA GCCTCCCTCGCGCCATCAGAGGTAGCACATGCTGCCTCCCGTAGGAGT  
AGGTAGGT GCCTCCCTCGCGCCATCAGAGGTAGGTCATGCTGCCTCCCGTAGGAGT  
AGGTCAAG GCCTCCCTCGCGCCATCAGAGGTCAAGCATGCTGCCTCCCGTAGGAGT  
AGGTCATC GCCTCCCTCGCGCCATCAGAGGTATCCATGCTGCCTCCCGTAGGAGT



AGGTCTAC GCCTCCCTCGCGCCATCAGAGGTCTACCATGCTGCCTCCCGTAGGAGT  
AGGTCTTG GCCTCCCTCGCGCCATCAGAGGTCTTGCATGCTGCCTCCCGTAGGAGT  
AGGTGAAC GCCTCCCTCGCGCCATCAGAGGTGAACCATGCTGCCTCCCGTAGGAGT  
AGGTGATG GCCTCCCTCGCGCCATCAGAGGTGATGCATGCTGCCTCCCGTAGGAGT  
AGGTGTAG GCCTCCCTCGCGCCATCAGAGGTGTAGCATGCTGCCTCCCGTAGGAGT  
AGGTGTTC GCCTCCCTCGCGCCATCAGAGGTGTTCCATGCTGCCTCCCGTAGGAGT  
AGGTTCCA GCCTCCCTCGCGCCATCAGAGGTTCCACATGCTGCCTCCCGTAGGAGT  
AGGTTTCG GCCTCCCTCGCGCCATCAGAGGTTTCGTCATGCTGCCTCCCGTAGGAGT  
AGGTTGCT GCCTCCCTCGCGCCATCAGAGGTTGTCATGCTGCCTCCCGTAGGAGT  
AGGTTGGA GCCTCCCTCGCGCCATCAGAGGTTGGACATGCTGCCTCCCGTAGGAGT  
AGTCACAC GCCTCCCTCGCGCCATCAGAGTCACACCATGCTGCCTCCCGTAGGAGT  
AGTCACTG GCCTCCCTCGCGCCATCAGAGTCACTG CATGCTGCCTCCCGTAGGAGT  
AGTCAGAG GCCTCCCTCGCGCCATCAGAGTCAGAGCATGCTGCCTCCCGTAGGAGT  
AGTCAGTC GCCTCCCTCGCGCCATCAGAGTCAGTCCATGCTGCCTCCCGTAGGAGT  
AGTCCACA GCCTCCCTCGCGCCATCAGAGTCCACACATGCTGCCTCCCGTAGGAGT  
AGTCCAGT GCCTCCCTCGCGCCATCAGAGTCCAGTCATGCTGCCTCCCGTAGGAGT  
AGTCCTCT GCCTCCCTCGCGCCATCAGAGTCCTCTCATGCTGCCTCCCGTAGGAGT  
AGTCCTGA GCCTCCCTCGCGCCATCAGAGTCCTGACATGCTGCCTCCCGTAGGAGT  
AGTCGACT GCCTCCCTCGCGCCATCAGAGTCGACTCATGCTGCCTCCCGTAGGAGT  
AGTCGAGA GCCTCCCTCGCGCCATCAGAGTCGAGACATGCTGCCTCCCGTAGGAGT  
AGTCGTCA GCCTCCCTCGCGCCATCAGAGTCGTACATGCTGCCTCCCGTAGGAGT  
AGTCGTGT GCCTCCCTCGCGCCATCAGAGTCGTGTCATGCTGCCTCCCGTAGGAGT  
AGTCTCAG GCCTCCCTCGCGCCATCAGAGTCTCAGCATGCTGCCTCCCGTAGGAGT  
AGTCTCTC GCCTCCCTCGCGCCATCAGAGTCTCTCCATGCTGCCTCCCGTAGGAGT  
AGTCTGAC GCCTCCCTCGCGCCATCAGAGTCTGACCATGCTGCCTCCCGTAGGAGT  
AGTCTGTG GCCTCCCTCGCGCCATCAGAGTCTGTGCATGCTGCCTCCCGTAGGAGT  
AGTGACAG GCCTCCCTCGCGCCATCAGAGTGACAGCATGCTGCCTCCCGTAGGAGT  
AGTGACTC GCCTCCCTCGCGCCATCAGAGTGACTCCATGCTGCCTCCCGTAGGAGT  
AGTGAGAC GCCTCCCTCGCGCCATCAGAGTGAGACCATGCTGCCTCCCGTAGGAGT  
AGTGAGTG GCCTCCCTCGCGCCATCAGAGTGAGTGCATGCTGCCTCCCGTAGGAGT  
AGTGCACT GCCTCCCTCGCGCCATCAGAGTGCACTCATGCTGCCTCCCGTAGGAGT  
AGTGCAGA GCCTCCCTCGCGCCATCAGAGTGACAGCATGCTGCCTCCCGTAGGAGT  
AGTGCTCA GCCTCCCTCGCGCCATCAGAGTGCTCACATGCTGCCTCCCGTAGGAGT  
AGTGCTGT GCCTCCCTCGCGCCATCAGAGTGCTGTCATGCTGCCTCCCGTAGGAGT  
AGTGGACA GCCTCCCTCGCGCCATCAGAGTGGACACATGCTGCCTCCCGTAGGAGT  
AGTGAGGT GCCTCCCTCGCGCCATCAGAGTGGAGTCATGCTGCCTCCCGTAGGAGT  
AGTGGTCT GCCTCCCTCGCGCCATCAGAGTGGTCTCATGCTGCCTCCCGTAGGAGT  
AGTGGTGA GCCTCCCTCGCGCCATCAGAGTGGTGACATGCTGCCTCCCGTAGGAGT  
AGTGTCAC GCCTCCCTCGCGCCATCAGAGTGTACCATGCTGCCTCCCGTAGGAGT  
AGTGCTGT GCCTCCCTCGCGCCATCAGAGTGTCTGCATGCTGCCTCCCGTAGGAGT  
AGTGAGAG GCCTCCCTCGCGCCATCAGAGTGTGAGCATGCTGCCTCCCGTAGGAGT  
AGTGGTGC GCCTCCCTCGCGCCATCAGAGTGTGTCCATGCTGCCTCCCGTAGGAGT  
ATAACCGC GCCTCCCTCGCGCCATCAGATAACCGCCATGCTGCCTCCCGTAGGAGT  
ATAACGCC GCCTCCCTCGCGCCATCAGATAACGCCATGCTGCCTCCCGTAGGAGT  
ATAAGCGG GCCTCCCTCGCGCCATCAGATAAGCGGCATGCTGCCTCCCGTAGGAGT  
ATAAGGCG GCCTCCCTCGCGCCATCAGATAAGGCGCATGCTGCCTCCCGTAGGAGT  
ATATCCGG GCCTCCCTCGCGCCATCAGATATCCGGCATGCTGCCTCCCGTAGGAGT  
ATATCGCG GCCTCCCTCGCGCCATCAGATATCGCGCATGCTGCCTCCCGTAGGAGT  
ATATCGGC GCCTCCCTCGCGCCATCAGATATCGGCCATGCTGCCTCCCGTAGGAGT

ATATGCCG GCCTCCCTCGCGCCATCAGATATGCCGCATGCTGCCTCCCGTAGGAGT  
ATATGCGC GCCTCCCTCGCGCCATCAGATATGCGCCATGCTGCCTCCCGTAGGAGT  
ATATGGCC GCCTCCCTCGCGCCATCAGATATGGCCCATGCTGCCTCCCGTAGGAGT  
ATCCAACG GCCTCCCTCGCGCCATCAGATCCAACGCATGCTGCCTCCCGTAGGAGT  
ATCCAAGC GCCTCCCTCGCGCCATCAGATCCAAGCCATGCTGCCTCCCGTAGGAGT  
ATCCATCC GCCTCCCTCGCGCCATCAGATCCATCCCATGCTGCCTCCCGTAGGAGT  
ATCCATGG GCCTCCCTCGCGCCATCAGATCCATGGCATGCTGCCTCCCGTAGGAGT  
ATCCGCAA GCCTCCCTCGCGCCATCAGATCCGCAACATGCTGCCTCCCGTAGGAGT  
ATCCGCTT GCCTCCCTCGCGCCATCAGATCCGCTTCATGCTGCCTCCCGTAGGAGT  
ATCCGGAT GCCTCCCTCGCGCCATCAGATCCGGATCATGCTGCCTCCCGTAGGAGT  
ATCCGGTA GCCTCCCTCGCGCCATCAGATCCGGTACATGCTGCCTCCCGTAGGAGT  
ATCCTACC GCCTCCCTCGCGCCATCAGATCCTACCCATGCTGCCTCCCGTAGGAGT  
ATCCTAGG GCCTCCCTCGCGCCATCAGATCCTAGGCATGCTGCCTCCCGTAGGAGT  
ATCCTTCG GCCTCCCTCGCGCCATCAGATCCTTCGCATGCTGCCTCCCGTAGGAGT  
ATCCTTGC GCCTCCCTCGCGCCATCAGATCCTTGCCATGCTGCCTCCCGTAGGAGT  
ATCGAACC GCCTCCCTCGCGCCATCAGATCGAACCATGCTGCCTCCCGTAGGAGT  
ATCGAAGG GCCTCCCTCGCGCCATCAGATCGAAGGCATGCTGCCTCCCGTAGGAGT  
ATCGATCG GCCTCCCTCGCGCCATCAGATCGATCGCATGCTGCCTCCCGTAGGAGT  
ATCGATGC GCCTCCCTCGCGCCATCAGATCGATGCCATGCTGCCTCCCGTAGGAGT  
ATCGCCAA GCCTCCCTCGCGCCATCAGATCGCCAACATGCTGCCTCCCGTAGGAGT  
ATCGCCTT GCCTCCCTCGCGCCATCAGATCGCCTTCATGCTGCCTCCCGTAGGAGT  
ATCGCGAT GCCTCCCTCGCGCCATCAGATCGCGATCATGCTGCCTCCCGTAGGAGT  
ATCGCGTA GCCTCCCTCGCGCCATCAGATCGCGTACATGCTGCCTCCCGTAGGAGT  
ATCGGCAT GCCTCCCTCGCGCCATCAGATCGGCATCATGCTGCCTCCCGTAGGAGT  
ATCGGCTA GCCTCCCTCGCGCCATCAGATCGGCTACATGCTGCCTCCCGTAGGAGT  
ATCGTACG GCCTCCCTCGCGCCATCAGATCGTACGCATGCTGCCTCCCGTAGGAGT  
ATCGTAGC GCCTCCCTCGCGCCATCAGATCGTAGCCATGCTGCCTCCCGTAGGAGT  
ATCGTTCC GCCTCCCTCGCGCCATCAGATCGTTCCCATGCTGCCTCCCGTAGGAGT  
ATCGTTGG GCCTCCCTCGCGCCATCAGATCGTTGGCATGCTGCCTCCCGTAGGAGT  
ATGCAACC GCCTCCCTCGCGCCATCAGATGCAACCATGCTGCCTCCCGTAGGAGT  
ATGCAAGG GCCTCCCTCGCGCCATCAGATGCAAGGCATGCTGCCTCCCGTAGGAGT  
ATGCATCG GCCTCCCTCGCGCCATCAGATGCATCGCATGCTGCCTCCCGTAGGAGT  
ATGCATGC GCCTCCCTCGCGCCATCAGATGCATGCCATGCTGCCTCCCGTAGGAGT  
ATGCCGAT GCCTCCCTCGCGCCATCAGATGCCGATCATGCTGCCTCCCGTAGGAGT  
ATGCCGTA GCCTCCCTCGCGCCATCAGATGCCGTACATGCTGCCTCCCGTAGGAGT  
ATGCGCAT GCCTCCCTCGCGCCATCAGATGCGCATCATGCTGCCTCCCGTAGGAGT  
ATGCGCTA GCCTCCCTCGCGCCATCAGATGCGCTACATGCTGCCTCCCGTAGGAGT  
ATGCGGAA GCCTCCCTCGCGCCATCAGATGCGGAACATGCTGCCTCCCGTAGGAGT  
ATGCGGTT GCCTCCCTCGCGCCATCAGATGCGGTTTCATGCTGCCTCCCGTAGGAGT  
ATGCTACG GCCTCCCTCGCGCCATCAGATGCTACGCATGCTGCCTCCCGTAGGAGT  
ATGCTAGC GCCTCCCTCGCGCCATCAGATGCTAGCCATGCTGCCTCCCGTAGGAGT  
ATGCTTCC GCCTCCCTCGCGCCATCAGATGCTTCCCATGCTGCCTCCCGTAGGAGT  
ATGCTTGG GCCTCCCTCGCGCCATCAGATGCTTGGCATGCTGCCTCCCGTAGGAGT  
ATGGAACG GCCTCCCTCGCGCCATCAGATGGAACGCATGCTGCCTCCCGTAGGAGT  
ATGGAAGC GCCTCCCTCGCGCCATCAGATGGAAGCCATGCTGCCTCCCGTAGGAGT  
ATGGATCC GCCTCCCTCGCGCCATCAGATGGATCCCATGCTGCCTCCCGTAGGAGT  
ATGGATGG GCCTCCCTCGCGCCATCAGATGGATGGCATGCTGCCTCCCGTAGGAGT  
ATGGCCAT GCCTCCCTCGCGCCATCAGATGGCCATCATGCTGCCTCCCGTAGGAGT  
ATGGCCTA GCCTCCCTCGCGCCATCAGATGGCCTACATGCTGCCTCCCGTAGGAGT

ATGGCGAA GCCTCCCTCGCGCCATCAGATGGCGAACATGCTGCCTCCCGTAGGAGT  
ATGGCGTT GCCTCCCTCGCGCCATCAGATGGCGTTCATGCTGCCTCCCGTAGGAGT  
ATGGTACC GCCTCCCTCGCGCCATCAGATGGTACCCATGCTGCCTCCCGTAGGAGT  
ATGGTAGG GCCTCCCTCGCGCCATCAGATGGTAGGCATGCTGCCTCCCGTAGGAGT  
ATGGTTCG GCCTCCCTCGCGCCATCAGATGGTTCGCATGCTGCCTCCCGTAGGAGT  
ATGGTTGC GCCTCCCTCGCGCCATCAGATGGTTGCCATGCTGCCTCCCGTAGGAGT  
ATTACCGG GCCTCCCTCGCGCCATCAGATTACCGGCATGCTGCCTCCCGTAGGAGT  
ATTACGCG GCCTCCCTCGCGCCATCAGATTACGCGCATGCTGCCTCCCGTAGGAGT  
ATTACGGC GCCTCCCTCGCGCCATCAGATTACGGCCATGCTGCCTCCCGTAGGAGT  
ATTAGCCG GCCTCCCTCGCGCCATCAGATTAGCCGCATGCTGCCTCCCGTAGGAGT  
ATTAGCGC GCCTCCCTCGCGCCATCAGATTAGCGCCATGCTGCCTCCCGTAGGAGT  
ATTAGGCC GCCTCCCTCGCGCCATCAGATTAGGCCATGCTGCCTCCCGTAGGAGT  
CAACACCA GCCTCCCTCGCGCCATCAGCAACACCACATGCTGCCTCCCGTAGGAGT  
CAACACGT GCCTCCCTCGCGCCATCAGCAACACGTCATGCTGCCTCCCGTAGGAGT  
CAACAGCT GCCTCCCTCGCGCCATCAGCAACAGCTCATGCTGCCTCCCGTAGGAGT  
CAACAGGA GCCTCCCTCGCGCCATCAGCAACAGGACATGCTGCCTCCCGTAGGAGT  
CAACCAAC GCCTCCCTCGCGCCATCAGCAACCAACCATGCTGCCTCCCGTAGGAGT  
CAACCATG GCCTCCCTCGCGCCATCAGCAACCATGCATGCTGCCTCCCGTAGGAGT  
CAACCTAG GCCTCCCTCGCGCCATCAGCAACCTAGCATGCTGCCTCCCGTAGGAGT  
CAACCTTC GCCTCCCTCGCGCCATCAGCAACCTTCCATGCTGCCTCCCGTAGGAGT  
CAACGAAG GCCTCCCTCGCGCCATCAGCAACGAAGCATGCTGCCTCCCGTAGGAGT  
CAACGATC GCCTCCCTCGCGCCATCAGCAACGATCCATGCTGCCTCCCGTAGGAGT  
CAACGTAC GCCTCCCTCGCGCCATCAGCAACGTACCATGCTGCCTCCCGTAGGAGT  
CAACGTTG GCCTCCCTCGCGCCATCAGCAACGTTGCATGCTGCCTCCCGTAGGAGT  
CAACTCCT GCCTCCCTCGCGCCATCAGCAACTCCTCATGCTGCCTCCCGTAGGAGT  
CAACTCGA GCCTCCCTCGCGCCATCAGCAACTCGACATGCTGCCTCCCGTAGGAGT  
CAACTGCA GCCTCCCTCGCGCCATCAGCAACTGCACATGCTGCCTCCCGTAGGAGT  
CAACTGGT GCCTCCCTCGCGCCATCAGCAACTGGTCATGCTGCCTCCCGTAGGAGT  
CAAGACCT GCCTCCCTCGCGCCATCAGCAAGACCTCATGCTGCCTCCCGTAGGAGT  
CAAGACGA GCCTCCCTCGCGCCATCAGCAAGACGACATGCTGCCTCCCGTAGGAGT  
CAAGAGCA GCCTCCCTCGCGCCATCAGCAAGAGCACATGCTGCCTCCCGTAGGAGT  
CAAGAGGT GCCTCCCTCGCGCCATCAGCAAGAGGTCATGCTGCCTCCCGTAGGAGT  
CAAGCAAG GCCTCCCTCGCGCCATCAGCAAGCAAGCATGCTGCCTCCCGTAGGAGT  
CAAGCATC GCCTCCCTCGCGCCATCAGCAAGCATCCATGCTGCCTCCCGTAGGAGT  
CAAGCTAC GCCTCCCTCGCGCCATCAGCAAGCTACCATGCTGCCTCCCGTAGGAGT  
CAAGCTTG GCCTCCCTCGCGCCATCAGCAAGCTTGCATGCTGCCTCCCGTAGGAGT  
CAAGGAAC GCCTCCCTCGCGCCATCAGCAAGGAACCATGCTGCCTCCCGTAGGAGT  
CAAGGATG GCCTCCCTCGCGCCATCAGCAAGGATGCATGCTGCCTCCCGTAGGAGT  
CAAGGTAG GCCTCCCTCGCGCCATCAGCAAGGTAGCATGCTGCCTCCCGTAGGAGT  
CAAGGTTT GCCTCCCTCGCGCCATCAGCAAGGTTCCATGCTGCCTCCCGTAGGAGT  
CAAGTCCA GCCTCCCTCGCGCCATCAGCAAGTCCACATGCTGCCTCCCGTAGGAGT  
CAAGTCGT GCCTCCCTCGCGCCATCAGCAAGTCGTCATGCTGCCTCCCGTAGGAGT  
CAAGTGCT GCCTCCCTCGCGCCATCAGCAAGTGCTCATGCTGCCTCCCGTAGGAGT  
CAAGTGGA GCCTCCCTCGCGCCATCAGCAAGTGGACATGCTGCCTCCCGTAGGAGT  
CACAACAC GCCTCCCTCGCGCCATCAGCACAACACCATGCTGCCTCCCGTAGGAGT  
CACAACAC GCCTCCCTCGCGCCATCAGCACAACACCATGCTGCCTCCCGTAGGAGT  
CACAAGAG GCCTCCCTCGCGCCATCAGCACAAGAGCATGCTGCCTCCCGTAGGAGT  
CACAAGTC GCCTCCCTCGCGCCATCAGCACAAGTCCATGCTGCCTCCCGTAGGAGT  
CACACACA GCCTCCCTCGCGCCATCAGCACACACACATGCTGCCTCCCGTAGGAGT

CACACAGT GCCTCCCTCGCGCCATCAGCACACAGTCATGCTGCCTCCCGTAGGAGT  
CACACTCT GCCTCCCTCGCGCCATCAGCACACTCTCATGCTGCCTCCCGTAGGAGT  
CACACTGA GCCTCCCTCGCGCCATCAGCACACTGACATGCTGCCTCCCGTAGGAGT  
CACAGACT GCCTCCCTCGCGCCATCAGCACAGACTCATGCTGCCTCCCGTAGGAGT  
CACAGAGA GCCTCCCTCGCGCCATCAGCACAGAGACATGCTGCCTCCCGTAGGAGT  
CACAGTCA GCCTCCCTCGCGCCATCAGCACAGTACATGCTGCCTCCCGTAGGAGT  
CACAGTGT GCCTCCCTCGCGCCATCAGCACAGTGTTCATGCTGCCTCCCGTAGGAGT  
CACATCAG GCCTCCCTCGCGCCATCAGCACATCAGCATGCTGCCTCCCGTAGGAGT  
CACATCTC GCCTCCCTCGCGCCATCAGCACATCTCCATGCTGCCTCCCGTAGGAGT  
CACATGAC GCCTCCCTCGCGCCATCAGCACATGACCATGCTGCCTCCCGTAGGAGT  
CACATGTG GCCTCCCTCGCGCCATCAGCACATGTGCATGCTGCCTCCCGTAGGAGT  
CACTACAG GCCTCCCTCGCGCCATCAGCACTACAGCATGCTGCCTCCCGTAGGAGT  
CACTACTC GCCTCCCTCGCGCCATCAGCACTACTCCATGCTGCCTCCCGTAGGAGT  
CACTAGAC GCCTCCCTCGCGCCATCAGCACTAGACCATGCTGCCTCCCGTAGGAGT  
CACTAGTG GCCTCCCTCGCGCCATCAGCACTAGTGCATGCTGCCTCCCGTAGGAGT  
CACTCACT GCCTCCCTCGCGCCATCAGCACTCACTCATGCTGCCTCCCGTAGGAGT  
CACTCAGA GCCTCCCTCGCGCCATCAGCACTCAGACATGCTGCCTCCCGTAGGAGT  
CACTCTCA GCCTCCCTCGCGCCATCAGCACTCTCACATGCTGCCTCCCGTAGGAGT  
CACTCTGT GCCTCCCTCGCGCCATCAGCACTCTGTCATGCTGCCTCCCGTAGGAGT  
CACTGACA GCCTCCCTCGCGCCATCAGCACTGACACATGCTGCCTCCCGTAGGAGT  
CACTGAGT GCCTCCCTCGCGCCATCAGCACTGAGTCATGCTGCCTCCCGTAGGAGT  
CACTGTCT GCCTCCCTCGCGCCATCAGCACTGTCTCATGCTGCCTCCCGTAGGAGT  
CACTGTGA GCCTCCCTCGCGCCATCAGCACTGTGACATGCTGCCTCCCGTAGGAGT  
CACTTCAC GCCTCCCTCGCGCCATCAGCACTTCACCATGCTGCCTCCCGTAGGAGT  
CACTTCTG GCCTCCCTCGCGCCATCAGCACTTCTGCATGCTGCCTCCCGTAGGAGT  
CACTTGAG GCCTCCCTCGCGCCATCAGCACTTGAGCATGCTGCCTCCCGTAGGAGT  
CACTTGTC GCCTCCCTCGCGCCATCAGCACTTGTCCATGCTGCCTCCCGTAGGAGT  
CAGAACAG GCCTCCCTCGCGCCATCAGCAGAACAGCATGCTGCCTCCCGTAGGAGT  
CAGAACTC GCCTCCCTCGCGCCATCAGCAGAACTCCATGCTGCCTCCCGTAGGAGT  
CAGAAGAC GCCTCCCTCGCGCCATCAGCAGAAGACCATGCTGCCTCCCGTAGGAGT  
CAGAAGTG GCCTCCCTCGCGCCATCAGCAGAAGTGCATGCTGCCTCCCGTAGGAGT  
CAGACACT GCCTCCCTCGCGCCATCAGCAGACACTCATGCTGCCTCCCGTAGGAGT  
CAGACAGA GCCTCCCTCGCGCCATCAGCAGACAGACATGCTGCCTCCCGTAGGAGT  
CAGACTCA GCCTCCCTCGCGCCATCAGCAGACTCACATGCTGCCTCCCGTAGGAGT  
CAGACTGT GCCTCCCTCGCGCCATCAGCAGACTGTCATGCTGCCTCCCGTAGGAGT  
CAGAGACA GCCTCCCTCGCGCCATCAGCAGAGACACATGCTGCCTCCCGTAGGAGT  
CAGAGAGT GCCTCCCTCGCGCCATCAGCAGAGAGTTCATGCTGCCTCCCGTAGGAGT  
CAGAGTCT GCCTCCCTCGCGCCATCAGCAGAGTCTCATGCTGCCTCCCGTAGGAGT  
CAGAGTGA GCCTCCCTCGCGCCATCAGCAGAGTGACATGCTGCCTCCCGTAGGAGT  
CAGATCAC GCCTCCCTCGCGCCATCAGCAGATCACCATGCTGCCTCCCGTAGGAGT  
CAGATCTG GCCTCCCTCGCGCCATCAGCAGATCTGCATGCTGCCTCCCGTAGGAGT  
CAGATGAG GCCTCCCTCGCGCCATCAGCAGATGAGCATGCTGCCTCCCGTAGGAGT  
CAGATGTC GCCTCCCTCGCGCCATCAGCAGATGTCCATGCTGCCTCCCGTAGGAGT  
CAGTACAC GCCTCCCTCGCGCCATCAGCAGTACACCATGCTGCCTCCCGTAGGAGT  
CAGTACTG GCCTCCCTCGCGCCATCAGCAGTACTGCATGCTGCCTCCCGTAGGAGT  
CAGTAGAG GCCTCCCTCGCGCCATCAGCAGTAGAGCATGCTGCCTCCCGTAGGAGT  
CAGTAGTC GCCTCCCTCGCGCCATCAGCAGTAGTCCATGCTGCCTCCCGTAGGAGT  
CAGTCACA GCCTCCCTCGCGCCATCAGCAGTACACATGCTGCCTCCCGTAGGAGT  
CAGTCAGT GCCTCCCTCGCGCCATCAGCAGTACATGCTGCCTCCCGTAGGAGT

CAGTCTCT GCCTCCCTCGCGCCATCAGCAGTCTCTCATGCTGCCTCCCGTAGGAGT  
CAGTCTGA GCCTCCCTCGCGCCATCAGCAGTCTGACATGCTGCCTCCCGTAGGAGT  
CAGTGA CT GCCTCCCTCGCGCCATCAGCAGTACTCATGCTGCCTCCCGTAGGAGT  
CAGTGAGA GCCTCCCTCGCGCCATCAGCAGTGAGACATGCTGCCTCCCGTAGGAGT  
CAGTGTCA GCCTCCCTCGCGCCATCAGCAGTGTACATGCTGCCTCCCGTAGGAGT  
CAGTGTGT GCCTCCCTCGCGCCATCAGCAGTGTGTCATGCTGCCTCCCGTAGGAGT  
CAGTTCAG GCCTCCCTCGCGCCATCAGCAGTTCAGCATGCTGCCTCCCGTAGGAGT  
CAGTTCTC GCCTCCCTCGCGCCATCAGCAGTTCTCCATGCTGCCTCCCGTAGGAGT  
CAGTTGAC GCCTCCCTCGCGCCATCAGCAGTTGACCATGCTGCCTCCCGTAGGAGT  
CAGTTGTG GCCTCCCTCGCGCCATCAGCAGTTGTGCATGCTGCCTCCCGTAGGAGT  
CATCACCT GCCTCCCTCGCGCCATCAGCATCACCTCATGCTGCCTCCCGTAGGAGT  
CATCACGA GCCTCCCTCGCGCCATCAGCATCACGACATGCTGCCTCCCGTAGGAGT  
CATCAGCA GCCTCCCTCGCGCCATCAGCATCAGCACATGCTGCCTCCCGTAGGAGT  
CATCAGGT GCCTCCCTCGCGCCATCAGCATCAGGTCATGCTGCCTCCCGTAGGAGT  
CATCCAAG GCCTCCCTCGCGCCATCAGCATCCAAGCATGCTGCCTCCCGTAGGAGT  
CATCCATC GCCTCCCTCGCGCCATCAGCATCCATCCATGCTGCCTCCCGTAGGAGT  
CATCCTAC GCCTCCCTCGCGCCATCAGCATCCTACCATGCTGCCTCCCGTAGGAGT  
CATCCTTG GCCTCCCTCGCGCCATCAGCATCCTTGTCATGCTGCCTCCCGTAGGAGT  
CATCGAAC GCCTCCCTCGCGCCATCAGCATCGAACCATGCTGCCTCCCGTAGGAGT  
CATCGATG GCCTCCCTCGCGCCATCAGCATCGATGCATGCTGCCTCCCGTAGGAGT  
CATCGTAG GCCTCCCTCGCGCCATCAGCATCGTAGCATGCTGCCTCCCGTAGGAGT  
CATCGTTC GCCTCCCTCGCGCCATCAGCATCGTTCATGCTGCCTCCCGTAGGAGT  
CATCTCCA GCCTCCCTCGCGCCATCAGCATCTCCACATGCTGCCTCCCGTAGGAGT  
CATCTCGT GCCTCCCTCGCGCCATCAGCATCTCGTCATGCTGCCTCCCGTAGGAGT  
CATCTGCT GCCTCCCTCGCGCCATCAGCATCTGCTCATGCTGCCTCCCGTAGGAGT  
CATCTGGA GCCTCCCTCGCGCCATCAGCATCTGGACATGCTGCCTCCCGTAGGAGT  
CATGACCA GCCTCCCTCGCGCCATCAGCATGACCACATGCTGCCTCCCGTAGGAGT  
CATGACGT GCCTCCCTCGCGCCATCAGCATGACGTCATGCTGCCTCCCGTAGGAGT  
CATGAGCT GCCTCCCTCGCGCCATCAGCATGAGCTCATGCTGCCTCCCGTAGGAGT  
CATGAGGA GCCTCCCTCGCGCCATCAGCATGAGGACATGCTGCCTCCCGTAGGAGT  
CATGCAAC GCCTCCCTCGCGCCATCAGCATGCAACCATGCTGCCTCCCGTAGGAGT  
CATGCATG GCCTCCCTCGCGCCATCAGCATGCATGCATGCTGCCTCCCGTAGGAGT  
CATGCTAG GCCTCCCTCGCGCCATCAGCATGCTAGCATGCTGCCTCCCGTAGGAGT  
CATGCTTC GCCTCCCTCGCGCCATCAGCATGCTTCATGCTGCCTCCCGTAGGAGT  
CATGGAAG GCCTCCCTCGCGCCATCAGCATGGAAGCATGCTGCCTCCCGTAGGAGT  
CATGGATC GCCTCCCTCGCGCCATCAGCATGGATCCATGCTGCCTCCCGTAGGAGT  
CATGGTAC GCCTCCCTCGCGCCATCAGCATGGTACCATGCTGCCTCCCGTAGGAGT  
CATGGTTG GCCTCCCTCGCGCCATCAGCATGGTTGCATGCTGCCTCCCGTAGGAGT  
CATGTCCT GCCTCCCTCGCGCCATCAGCATGTCCTCATGCTGCCTCCCGTAGGAGT  
CATGT CGA GCCTCCCTCGCGCCATCAGCATGT CGACATGCTGCCTCCCGTAGGAGT  
CATGTGCA GCCTCCCTCGCGCCATCAGCATGTGCACATGCTGCCTCCCGTAGGAGT  
CATGTGGT GCCTCCCTCGCGCCATCAGCATGTGGTCATGCTGCCTCCCGTAGGAGT  
CCAACCAA GCCTCCCTCGCGCCATCAGCCAACCAACATGCTGCCTCCCGTAGGAGT  
CCAACCTT GCCTCCCTCGCGCCATCAGCCAACCTTCATGCTGCCTCCCGTAGGAGT  
CCAACGAT GCCTCCCTCGCGCCATCAGCCAACGATCATGCTGCCTCCCGTAGGAGT  
CCAACGTA GCCTCCCTCGCGCCATCAGCCAACGTACATGCTGCCTCCCGTAGGAGT  
CCAAGCAT GCCTCCCTCGCGCCATCAGCCAAGCATCATGCTGCCTCCCGTAGGAGT  
CCAAGCTA GCCTCCCTCGCGCCATCAGCCAAGCTACATGCTGCCTCCCGTAGGAGT  
CCAAGGAA GCCTCCCTCGCGCCATCAGCCAAGGAACATGCTGCCTCCCGTAGGAGT

CCAAGGTT GCCTCCCTCGCGCCATCAGCCAAGGTTTCATGCTGCCTCCCGTAGGAGT  
CCAATACG GCCTCCCTCGCGCCATCAGCCAATACGCATGCTGCCTCCCGTAGGAGT  
CCAATAGC GCCTCCCTCGCGCCATCAGCCAATAGCCATGCTGCCTCCCGTAGGAGT  
CCAATTCC GCCTCCCTCGCGCCATCAGCCAATCCCATGCTGCCTCCCGTAGGAGT  
CCAATTGG GCCTCCCTCGCGCCATCAGCCAATTGGCATGCTGCCTCCCGTAGGAGT  
CCATAACG GCCTCCCTCGCGCCATCAGCCATAACGCATGCTGCCTCCCGTAGGAGT  
CCATAAGC GCCTCCCTCGCGCCATCAGCCATAAGCCATGCTGCCTCCCGTAGGAGT  
CCATATCC GCCTCCCTCGCGCCATCAGCCATATCCCATGCTGCCTCCCGTAGGAGT  
CCATATGG GCCTCCCTCGCGCCATCAGCCATATGGCATGCTGCCTCCCGTAGGAGT  
CCATCCAT GCCTCCCTCGCGCCATCAGCCATCCATCATGCTGCCTCCCGTAGGAGT  
CCATCCTA GCCTCCCTCGCGCCATCAGCCATCCTACATGCTGCCTCCCGTAGGAGT  
CCATCGAA GCCTCCCTCGCGCCATCAGCCATCGAACATGCTGCCTCCCGTAGGAGT  
CCATCGTT GCCTCCCTCGCGCCATCAGCCATCGTTCATGCTGCCTCCCGTAGGAGT  
CCATGCAA GCCTCCCTCGCGCCATCAGCCATGCAACATGCTGCCTCCCGTAGGAGT  
CCATGCTT GCCTCCCTCGCGCCATCAGCCATGCTTCATGCTGCCTCCCGTAGGAGT  
CCATGGAT GCCTCCCTCGCGCCATCAGCCATGGATCATGCTGCCTCCCGTAGGAGT  
CCATGGTA GCCTCCCTCGCGCCATCAGCCATGGTACATGCTGCCTCCCGTAGGAGT  
CCATTACC GCCTCCCTCGCGCCATCAGCCATTACCCATGCTGCCTCCCGTAGGAGT  
CCATTAGG GCCTCCCTCGCGCCATCAGCCATTAGGCATGCTGCCTCCCGTAGGAGT  
CCGCAATA GCCTCCCTCGCGCCATCAGCCGCAATACATGCTGCCTCCCGTAGGAGT  
CCGCATAA GCCTCCCTCGCGCCATCAGCCGCAATACATGCTGCCTCCCGTAGGAGT  
CCGCTATT GCCTCCCTCGCGCCATCAGCCGCTATTCATGCTGCCTCCCGTAGGAGT  
CCGCTTAT GCCTCCCTCGCGCCATCAGCCGCTTATCATGCTGCCTCCCGTAGGAGT  
CCGGAATT GCCTCCCTCGCGCCATCAGCCGGAATTCATGCTGCCTCCCGTAGGAGT  
CCGGATAT GCCTCCCTCGCGCCATCAGCCGGATATCATGCTGCCTCCCGTAGGAGT  
CCGGATTA GCCTCCCTCGCGCCATCAGCCGGATTACATGCTGCCTCCCGTAGGAGT  
CCGGTAAT GCCTCCCTCGCGCCATCAGCCGGTAATCATGCTGCCTCCCGTAGGAGT  
CCGGTATA GCCTCCCTCGCGCCATCAGCCGGTATACATGCTGCCTCCCGTAGGAGT  
CCGGTTAA GCCTCCCTCGCGCCATCAGCCGGTTAACATGCTGCCTCCCGTAGGAGT  
CCTAATCC GCCTCCCTCGCGCCATCAGCCTAATCCCATGCTGCCTCCCGTAGGAGT  
CCTAATGG GCCTCCCTCGCGCCATCAGCCTAATGGCATGCTGCCTCCCGTAGGAGT  
CCTACCAT GCCTCCCTCGCGCCATCAGCCTACCATCATGCTGCCTCCCGTAGGAGT  
CCTACCTA GCCTCCCTCGCGCCATCAGCCTACCTACATGCTGCCTCCCGTAGGAGT  
CCTACGAA GCCTCCCTCGCGCCATCAGCCTACGAACATGCTGCCTCCCGTAGGAGT  
CCTACGTT GCCTCCCTCGCGCCATCAGCCTACGTTTCATGCTGCCTCCCGTAGGAGT  
CCTAGCAA GCCTCCCTCGCGCCATCAGCCTAGCAACATGCTGCCTCCCGTAGGAGT  
CCTAGCTT GCCTCCCTCGCGCCATCAGCCTAGCTTCATGCTGCCTCCCGTAGGAGT  
CCTAGGAT GCCTCCCTCGCGCCATCAGCCTAGGATCATGCTGCCTCCCGTAGGAGT  
CCTAGGTA GCCTCCCTCGCGCCATCAGCCTAGGTACATGCTGCCTCCCGTAGGAGT  
CCTATACC GCCTCCCTCGCGCCATCAGCCTATACCCATGCTGCCTCCCGTAGGAGT  
CCTATAGG GCCTCCCTCGCGCCATCAGCCTATAGGCATGCTGCCTCCCGTAGGAGT  
CCTATTCG GCCTCCCTCGCGCCATCAGCCTATTCGCATGCTGCCTCCCGTAGGAGT  
CCTATTGC GCCTCCCTCGCGCCATCAGCCTATTGCCATGCTGCCTCCCGTAGGAGT  
CCTTAACC GCCTCCCTCGCGCCATCAGCCTTAACCCATGCTGCCTCCCGTAGGAGT  
CCTTAAGG GCCTCCCTCGCGCCATCAGCCTTAAGGCATGCTGCCTCCCGTAGGAGT  
CCTTATCG GCCTCCCTCGCGCCATCAGCCTTATCGCATGCTGCCTCCCGTAGGAGT  
CCTTATGC GCCTCCCTCGCGCCATCAGCCTTATGCCATGCTGCCTCCCGTAGGAGT  
CCTTCAA GCCTCCCTCGCGCCATCAGCCTTCAAACATGCTGCCTCCCGTAGGAGT  
CCTTCCTT GCCTCCCTCGCGCCATCAGCCTTCCTTCATGCTGCCTCCCGTAGGAGT

CCTTCGAT GCCTCCCTCGCGCCATCAGCCTTCGATCATGCTGCCTCCCGTAGGAGT  
CCTTCGTA GCCTCCCTCGCGCCATCAGCCTTCGTACATGCTGCCTCCCGTAGGAGT  
CCTTGCA T GCCTCCCTCGCGCCATCAGCCTTGCA T CATGCTGCCTCCCGTAGGAGT  
CCTTGCTA GCCTCCCTCGCGCCATCAGCCTTGCTACATGCTGCCTCCCGTAGGAGT  
CCTTGGA A GCCTCCCTCGCGCCATCAGCCTTGGAACATGCTGCCTCCCGTAGGAGT  
CCTTGGTT GCCTCCCTCGCGCCATCAGCCTTGGTT CATGCTGCCTCCCGTAGGAGT  
CGAACCA T GCCTCCCTCGCGCCATCAGCGAACCA T CATGCTGCCTCCCGTAGGAGT  
CGAACCTA GCCTCCCTCGCGCCATCAGCGAACCTACATGCTGCCTCCCGTAGGAGT  
CGAACGAA GCCTCCCTCGCGCCATCAGCGAACGAACATGCTGCCTCCCGTAGGAGT  
CGAACGTT GCCTCCCTCGCGCCATCAGCGAACGTT CATGCTGCCTCCCGTAGGAGT  
CGAAGCA A GCCTCCCTCGCGCCATCAGCGAAGCAACATGCTGCCTCCCGTAGGAGT  
CGAAGCTT GCCTCCCTCGCGCCATCAGCGAAGCTT CATGCTGCCTCCCGTAGGAGT  
CGAAGGAT GCCTCCCTCGCGCCATCAGCGAAGGATCATGCTGCCTCCCGTAGGAGT  
CGAAGGTA GCCTCCCTCGCGCCATCAGCGAAGGTACATGCTGCCTCCCGTAGGAGT  
CGAATACC GCCTCCCTCGCGCCATCAGCGAATACCA T CATGCTGCCTCCCGTAGGAGT  
CGAATAGG GCCTCCCTCGCGCCATCAGCGAATAGGCATGCTGCCTCCCGTAGGAGT  
CGAATTCG GCCTCCCTCGCGCCATCAGCGAATTCGCA T GCTGCCTCCCGTAGGAGT  
CGAATTGC GCCTCCCTCGCGCCATCAGCGAATTGCCATGCTGCCTCCCGTAGGAGT  
CGATAACC GCCTCCCTCGCGCCATCAGCGATAACCA T GCTGCCTCCCGTAGGAGT  
CGATAAGG GCCTCCCTCGCGCCATCAGCGATAAGGCATGCTGCCTCCCGTAGGAGT  
CGATATCG GCCTCCCTCGCGCCATCAGCGATATCGCA T GCTGCCTCCCGTAGGAGT  
CGATATGC GCCTCCCTCGCGCCATCAGCGATATGCCATGCTGCCTCCCGTAGGAGT  
CGATCAA A GCCTCCCTCGCGCCATCAGCGATCAAACATGCTGCCTCCCGTAGGAGT  
CGATCCTT GCCTCCCTCGCGCCATCAGCGATCCTT CATGCTGCCTCCCGTAGGAGT  
CGATCGAT GCCTCCCTCGCGCCATCAGCGATCGATCA T GCTGCCTCCCGTAGGAGT  
CGATCGTA GCCTCCCTCGCGCCATCAGCGATCGTACA T GCTGCCTCCCGTAGGAGT  
CGATGCAT GCCTCCCTCGCGCCATCAGCGATGCATCA T GCTGCCTCCCGTAGGAGT  
CGATGCTA GCCTCCCTCGCGCCATCAGCGATGCTACA T GCTGCCTCCCGTAGGAGT  
CGATGGAA GCCTCCCTCGCGCCATCAGCGATGGAACATGCTGCCTCCCGTAGGAGT  
CGATGGTT GCCTCCCTCGCGCCATCAGCGATGGTT CATGCTGCCTCCCGTAGGAGT  
CGATTACG GCCTCCCTCGCGCCATCAGCGATTACGCA T GCTGCCTCCCGTAGGAGT  
CGATTAGC GCCTCCCTCGCGCCATCAGCGATTAGCCA T GCTGCCTCCCGTAGGAGT  
CGCCAATA GCCTCCCTCGCGCCATCAGCGCCAATACA T GCTGCCTCCCGTAGGAGT  
CGCCATAA GCCTCCCTCGCGCCATCAGCGCCATAACA T GCTGCCTCCCGTAGGAGT  
CGCCTATT GCCTCCCTCGCGCCATCAGCGCCTATT CA T GCTGCCTCCCGTAGGAGT  
CGCCTTAT GCCTCCCTCGCGCCATCAGCGCCTTATCA T GCTGCCTCCCGTAGGAGT  
CGCGAATT GCCTCCCTCGCGCCATCAGCGCGAATT CA T GCTGCCTCCCGTAGGAGT  
CGCGATAT GCCTCCCTCGCGCCATCAGCGCGATATCA T GCTGCCTCCCGTAGGAGT  
CGCGATTA GCCTCCCTCGCGCCATCAGCGCGATTACA T GCTGCCTCCCGTAGGAGT  
CGCGTAAT GCCTCCCTCGCGCCATCAGCGCGTAATCA T GCTGCCTCCCGTAGGAGT  
CGCGTATA GCCTCCCTCGCGCCATCAGCGCGTATACA T GCTGCCTCCCGTAGGAGT  
CGCGTTAA GCCTCCCTCGCGCCATCAGCGCGTTAA CA T GCTGCCTCCCGTAGGAGT  
CGGCAATT GCCTCCCTCGCGCCATCAGCGGCAATT CA T GCTGCCTCCCGTAGGAGT  
CGGCATAT GCCTCCCTCGCGCCATCAGCGGCATATCA T GCTGCCTCCCGTAGGAGT  
CGGCATTA GCCTCCCTCGCGCCATCAGCGGCATTACA T GCTGCCTCCCGTAGGAGT  
CGGCTAAT GCCTCCCTCGCGCCATCAGCGGCTAATCA T GCTGCCTCCCGTAGGAGT  
CGGCTATA GCCTCCCTCGCGCCATCAGCGGCTATACA T GCTGCCTCCCGTAGGAGT  
CGGCTTAA GCCTCCCTCGCGCCATCAGCGGCTTAA CA T GCTGCCTCCCGTAGGAGT  
CGTAATCG GCCTCCCTCGCGCCATCAGCGTAATCGCA T GCTGCCTCCCGTAGGAGT

CGTAATGC GCCTCCCTCGCGCCATCAGCGTAATGCCATGCTGCCTCCCGTAGGAGT  
CGTACCAA GCCTCCCTCGCGCCATCAGCGTACCAACATGCTGCCTCCCGTAGGAGT  
CGTACCTT GCCTCCCTCGCGCCATCAGCGTACCTTCATGCTGCCTCCCGTAGGAGT  
CGTACGAT GCCTCCCTCGCGCCATCAGCGTACGATCATGCTGCCTCCCGTAGGAGT  
CGTACGTA GCCTCCCTCGCGCCATCAGCGTACGTACATGCTGCCTCCCGTAGGAGT  
CGTAGCAT GCCTCCCTCGCGCCATCAGCGTAGCATCATGCTGCCTCCCGTAGGAGT  
CGTAGCTA GCCTCCCTCGCGCCATCAGCGTAGCTACATGCTGCCTCCCGTAGGAGT  
CGTAGGAA GCCTCCCTCGCGCCATCAGCGTAGGAACATGCTGCCTCCCGTAGGAGT  
CGTAGGTT GCCTCCCTCGCGCCATCAGCGTAGGTTTCATGCTGCCTCCCGTAGGAGT  
CGTATACG GCCTCCCTCGCGCCATCAGCGTATACGCATGCTGCCTCCCGTAGGAGT  
CGTATAGC GCCTCCCTCGCGCCATCAGCGTATAGCCATGCTGCCTCCCGTAGGAGT  
CGTATTCC GCCTCCCTCGCGCCATCAGCGTATTCCCATGCTGCCTCCCGTAGGAGT  
CGTATTGG GCCTCCCTCGCGCCATCAGCGTATTGGCATGCTGCCTCCCGTAGGAGT  
CGTTAACG GCCTCCCTCGCGCCATCAGCGTTAACGCATGCTGCCTCCCGTAGGAGT  
CGTTAAGC GCCTCCCTCGCGCCATCAGCGTTAAGCCATGCTGCCTCCCGTAGGAGT  
CGTTATCC GCCTCCCTCGCGCCATCAGCGTTATCCCATGCTGCCTCCCGTAGGAGT  
CGTTATGG GCCTCCCTCGCGCCATCAGCGTTATGGCATGCTGCCTCCCGTAGGAGT  
CGTTCCAT GCCTCCCTCGCGCCATCAGCGTTCCATCATGCTGCCTCCCGTAGGAGT  
CGTTCCTA GCCTCCCTCGCGCCATCAGCGTTCCTACATGCTGCCTCCCGTAGGAGT  
CGTTCGAA GCCTCCCTCGCGCCATCAGCGTTCGAACATGCTGCCTCCCGTAGGAGT  
CGTTCGTT GCCTCCCTCGCGCCATCAGCGTTCGTTTCATGCTGCCTCCCGTAGGAGT  
CGTTGCAA GCCTCCCTCGCGCCATCAGCGTTGCAACATGCTGCCTCCCGTAGGAGT  
CGTTGCTT GCCTCCCTCGCGCCATCAGCGTTGCTTCATGCTGCCTCCCGTAGGAGT  
CGTTGGAT GCCTCCCTCGCGCCATCAGCGTTGGATCATGCTGCCTCCCGTAGGAGT  
CGTTGGTA GCCTCCCTCGCGCCATCAGCGTTGGTACATGCTGCCTCCCGTAGGAGT  
CTACACCT GCCTCCCTCGCGCCATCAGCTACACCTCATGCTGCCTCCCGTAGGAGT  
CTACACGA GCCTCCCTCGCGCCATCAGCTACACGACATGCTGCCTCCCGTAGGAGT  
CTACAGCA GCCTCCCTCGCGCCATCAGCTACAGCACATGCTGCCTCCCGTAGGAGT  
CTACAGGT GCCTCCCTCGCGCCATCAGCTACAGGTCATGCTGCCTCCCGTAGGAGT  
CTACCAAG GCCTCCCTCGCGCCATCAGCTACCAAGCATGCTGCCTCCCGTAGGAGT  
CTACCATC GCCTCCCTCGCGCCATCAGCTACCATCCATGCTGCCTCCCGTAGGAGT  
CTACCTAC GCCTCCCTCGCGCCATCAGCTACCTACCATGCTGCCTCCCGTAGGAGT  
CTACCTTG GCCTCCCTCGCGCCATCAGCTACCTTGCATGCTGCCTCCCGTAGGAGT  
CTACGAAC GCCTCCCTCGCGCCATCAGCTACGAACCATGCTGCCTCCCGTAGGAGT  
CTACGATG GCCTCCCTCGCGCCATCAGCTACGATGCATGCTGCCTCCCGTAGGAGT  
CTACGTAG GCCTCCCTCGCGCCATCAGCTACGTAGCATGCTGCCTCCCGTAGGAGT  
CTACGTTC GCCTCCCTCGCGCCATCAGCTACGTTCATGCTGCCTCCCGTAGGAGT  
CTACTCCA GCCTCCCTCGCGCCATCAGCTACTCCACATGCTGCCTCCCGTAGGAGT  
CTACTCGT GCCTCCCTCGCGCCATCAGCTACTCGTCATGCTGCCTCCCGTAGGAGT  
CTACTGCT GCCTCCCTCGCGCCATCAGCTACTGCTCATGCTGCCTCCCGTAGGAGT  
CTACTGGA GCCTCCCTCGCGCCATCAGCTACTGGACATGCTGCCTCCCGTAGGAGT  
CTAGACCA GCCTCCCTCGCGCCATCAGCTAGACCACATGCTGCCTCCCGTAGGAGT  
CTAGACGT GCCTCCCTCGCGCCATCAGCTAGACGTCATGCTGCCTCCCGTAGGAGT  
CTAGAGCT GCCTCCCTCGCGCCATCAGCTAGAGCTCATGCTGCCTCCCGTAGGAGT  
CTAGAGGA GCCTCCCTCGCGCCATCAGCTAGAGGACATGCTGCCTCCCGTAGGAGT  
CTAGCAAC GCCTCCCTCGCGCCATCAGCTAGCAACCATGCTGCCTCCCGTAGGAGT  
CTAGCATG GCCTCCCTCGCGCCATCAGCTAGCATGCATGCTGCCTCCCGTAGGAGT  
CTAGCTAG GCCTCCCTCGCGCCATCAGCTAGCTAGCATGCTGCCTCCCGTAGGAGT  
CTAGCTTC GCCTCCCTCGCGCCATCAGCTAGCTTCCATGCTGCCTCCCGTAGGAGT



CTAGGAAG GCCTCCCTCGCGCCATCAGCTAGGAAGCATGCTGCCTCCCGTAGGAGT  
CTAGGATC GCCTCCCTCGCGCCATCAGCTAGGATCCATGCTGCCTCCCGTAGGAGT  
CTAGGTAC GCCTCCCTCGCGCCATCAGCTAGGTACCATGCTGCCTCCCGTAGGAGT  
CTAGGTTG GCCTCCCTCGCGCCATCAGCTAGGTTGCATGCTGCCTCCCGTAGGAGT  
CTAGTCCT GCCTCCCTCGCGCCATCAGCTAGTCCTCATGCTGCCTCCCGTAGGAGT  
CTAGTCGA GCCTCCCTCGCGCCATCAGCTAGTCGACATGCTGCCTCCCGTAGGAGT  
CTAGTGCA GCCTCCCTCGCGCCATCAGCTAGTGACATGCTGCCTCCCGTAGGAGT  
CTAGTGGT GCCTCCCTCGCGCCATCAGCTAGTGGTCATGCTGCCTCCCGTAGGAGT  
CTAACAG GCCTCCCTCGCGCCATCAGCTCAACAGCATGCTGCCTCCCGTAGGAGT  
CTCAACTC GCCTCCCTCGCGCCATCAGCTCAACTCCATGCTGCCTCCCGTAGGAGT  
CTCAAGAC GCCTCCCTCGCGCCATCAGCTCAAGACCATGCTGCCTCCCGTAGGAGT  
CTCAAGTG GCCTCCCTCGCGCCATCAGCTCAAGTGCATGCTGCCTCCCGTAGGAGT  
CTCACACT GCCTCCCTCGCGCCATCAGCTCACACTCATGCTGCCTCCCGTAGGAGT  
CTCACAGA GCCTCCCTCGCGCCATCAGCTCACAGACATGCTGCCTCCCGTAGGAGT  
CTCACTCA GCCTCCCTCGCGCCATCAGCTCACTCACATGCTGCCTCCCGTAGGAGT  
CTCACTGT GCCTCCCTCGCGCCATCAGCTCACTGTCATGCTGCCTCCCGTAGGAGT  
CTCAGACA GCCTCCCTCGCGCCATCAGCTCAGACACATGCTGCCTCCCGTAGGAGT  
CTCAGAGT GCCTCCCTCGCGCCATCAGCTCAGAGTCATGCTGCCTCCCGTAGGAGT  
CTCAGTCT GCCTCCCTCGCGCCATCAGCTCAGTCTCATGCTGCCTCCCGTAGGAGT  
CTCAGTGA GCCTCCCTCGCGCCATCAGCTCAGTGACATGCTGCCTCCCGTAGGAGT  
CTCATCAC GCCTCCCTCGCGCCATCAGCTCATCACCATGCTGCCTCCCGTAGGAGT  
CTCATCTG GCCTCCCTCGCGCCATCAGCTCATCTGCATGCTGCCTCCCGTAGGAGT  
CTCATGAG GCCTCCCTCGCGCCATCAGCTCATGAGCATGCTGCCTCCCGTAGGAGT  
CTCATGTC GCCTCCCTCGCGCCATCAGCTCATGTCCATGCTGCCTCCCGTAGGAGT  
CTCTACAC GCCTCCCTCGCGCCATCAGCTCTACACCATGCTGCCTCCCGTAGGAGT  
CTCTACTG GCCTCCCTCGCGCCATCAGCTCTACTGCATGCTGCCTCCCGTAGGAGT  
CTCTAGAG GCCTCCCTCGCGCCATCAGCTCTAGAGCATGCTGCCTCCCGTAGGAGT  
CTCTAGTC GCCTCCCTCGCGCCATCAGCTCTAGTCCATGCTGCCTCCCGTAGGAGT  
CTCTACA GCCTCCCTCGCGCCATCAGCTCTCACACATGCTGCCTCCCGTAGGAGT  
CTCTCAGT GCCTCCCTCGCGCCATCAGCTCTCAGTCATGCTGCCTCCCGTAGGAGT  
CTCTCTCT GCCTCCCTCGCGCCATCAGCTCTCTCTCATGCTGCCTCCCGTAGGAGT  
CTCTCTGA GCCTCCCTCGCGCCATCAGCTCTCTGACATGCTGCCTCCCGTAGGAGT  
CTCTGACT GCCTCCCTCGCGCCATCAGCTCTGACTCATGCTGCCTCCCGTAGGAGT  
CTCTGAGA GCCTCCCTCGCGCCATCAGCTCTGAGACATGCTGCCTCCCGTAGGAGT  
CTCTGTCA GCCTCCCTCGCGCCATCAGCTCTGTACATGCTGCCTCCCGTAGGAGT  
CTCTGTGT GCCTCCCTCGCGCCATCAGCTCTGTGTCATGCTGCCTCCCGTAGGAGT  
CTCTCAG GCCTCCCTCGCGCCATCAGCTCTTCAGCATGCTGCCTCCCGTAGGAGT  
CTCTTCTC GCCTCCCTCGCGCCATCAGCTCTTCTCCATGCTGCCTCCCGTAGGAGT  
CTCTTGAC GCCTCCCTCGCGCCATCAGCTCTTGACCATGCTGCCTCCCGTAGGAGT  
CTCTTGTG GCCTCCCTCGCGCCATCAGCTCTTGTGCATGCTGCCTCCCGTAGGAGT  
CTGAACAC GCCTCCCTCGCGCCATCAGCTGAACACCATGCTGCCTCCCGTAGGAGT  
CTGAACTG GCCTCCCTCGCGCCATCAGCTGAACTGCATGCTGCCTCCCGTAGGAGT  
CTGAAGAG GCCTCCCTCGCGCCATCAGCTGAAGAGCATGCTGCCTCCCGTAGGAGT  
CTGAAGTC GCCTCCCTCGCGCCATCAGCTGAAGTCCATGCTGCCTCCCGTAGGAGT  
CTGACACA GCCTCCCTCGCGCCATCAGCTGACACACATGCTGCCTCCCGTAGGAGT  
CTGACAGT GCCTCCCTCGCGCCATCAGCTGACAGTCATGCTGCCTCCCGTAGGAGT  
CTGACTCT GCCTCCCTCGCGCCATCAGCTGACTCTCATGCTGCCTCCCGTAGGAGT  
CTGACTGA GCCTCCCTCGCGCCATCAGCTGACTGACATGCTGCCTCCCGTAGGAGT  
CTGAGACT GCCTCCCTCGCGCCATCAGCTGAGACTCATGCTGCCTCCCGTAGGAGT

CTGAGAGA GCCTCCCTCGCGCCATCAGCTGAGAGACATGCTGCCTCCCGTAGGAGT  
CTGAGTCA GCCTCCCTCGCGCCATCAGCTGAGTACATGCTGCCTCCCGTAGGAGT  
CTGAGTGT GCCTCCCTCGCGCCATCAGCTGAGTGTCATGCTGCCTCCCGTAGGAGT  
CTGATCAG GCCTCCCTCGCGCCATCAGCTGATCAGCATGCTGCCTCCCGTAGGAGT  
CTGATCTC GCCTCCCTCGCGCCATCAGCTGATCTCCATGCTGCCTCCCGTAGGAGT  
CTGATGAC GCCTCCCTCGCGCCATCAGCTGATGACCATGCTGCCTCCCGTAGGAGT  
CTGATGTG GCCTCCCTCGCGCCATCAGCTGATGTGCATGCTGCCTCCCGTAGGAGT  
CTGTACAG GCCTCCCTCGCGCCATCAGCTGTACAGCATGCTGCCTCCCGTAGGAGT  
CTGTACTC GCCTCCCTCGCGCCATCAGCTGTACTCCATGCTGCCTCCCGTAGGAGT  
CTGTAGAC GCCTCCCTCGCGCCATCAGCTGTAGACCATGCTGCCTCCCGTAGGAGT  
CTGTAGTG GCCTCCCTCGCGCCATCAGCTGTAGTGCATGCTGCCTCCCGTAGGAGT  
CTGTCACT GCCTCCCTCGCGCCATCAGCTGTCACTCATGCTGCCTCCCGTAGGAGT  
CTGTCAGA GCCTCCCTCGCGCCATCAGCTGTGACACATGCTGCCTCCCGTAGGAGT  
CTGTCTCA GCCTCCCTCGCGCCATCAGCTGTCTCACATGCTGCCTCCCGTAGGAGT  
CTGTCTGT GCCTCCCTCGCGCCATCAGCTGTCTGTCATGCTGCCTCCCGTAGGAGT  
CTGTGACA GCCTCCCTCGCGCCATCAGCTGTGACACATGCTGCCTCCCGTAGGAGT  
CTGTGAGT GCCTCCCTCGCGCCATCAGCTGTGAGTCATGCTGCCTCCCGTAGGAGT  
CTGTGTCT GCCTCCCTCGCGCCATCAGCTGTGTCTCATGCTGCCTCCCGTAGGAGT  
CTGTGTGA GCCTCCCTCGCGCCATCAGCTGTGTGACATGCTGCCTCCCGTAGGAGT  
CTGTTAC GCCTCCCTCGCGCCATCAGCTGTTACCATGCTGCCTCCCGTAGGAGT  
CTGTTCTG GCCTCCCTCGCGCCATCAGCTGTTCTGCATGCTGCCTCCCGTAGGAGT  
CTGTTGAG GCCTCCCTCGCGCCATCAGCTGTTGAGCATGCTGCCTCCCGTAGGAGT  
CTGTTGTC GCCTCCCTCGCGCCATCAGCTGTTGTCCATGCTGCCTCCCGTAGGAGT  
CTTACCA GCCTCCCTCGCGCCATCAGCTTACCACATGCTGCCTCCCGTAGGAGT  
CTTACGT GCCTCCCTCGCGCCATCAGCTTACGTATGCTGCCTCCCGTAGGAGT  
CTTACGCT GCCTCCCTCGCGCCATCAGCTTACGCTCATGCTGCCTCCCGTAGGAGT  
CTTACGGA GCCTCCCTCGCGCCATCAGCTTACGACATGCTGCCTCCCGTAGGAGT  
CTTCAAC GCCTCCCTCGCGCCATCAGCTTCAACCATGCTGCCTCCCGTAGGAGT  
CTTCCATG GCCTCCCTCGCGCCATCAGCTTCCATGCATGCTGCCTCCCGTAGGAGT  
CTTCTAG GCCTCCCTCGCGCCATCAGCTTCTAGCATGCTGCCTCCCGTAGGAGT  
CTTCTTC GCCTCCCTCGCGCCATCAGCTTCTTCCATGCTGCCTCCCGTAGGAGT  
CTTGAAG GCCTCCCTCGCGCCATCAGCTTGAAGCATGCTGCCTCCCGTAGGAGT  
CTTCGATC GCCTCCCTCGCGCCATCAGCTTCGATCCATGCTGCCTCCCGTAGGAGT  
CTTCGTAC GCCTCCCTCGCGCCATCAGCTTCGTACCATGCTGCCTCCCGTAGGAGT  
CTTCGTTG GCCTCCCTCGCGCCATCAGCTTCGTTGCATGCTGCCTCCCGTAGGAGT  
CTTCTCCT GCCTCCCTCGCGCCATCAGCTTCTCCTCATGCTGCCTCCCGTAGGAGT  
CTTCTCGA GCCTCCCTCGCGCCATCAGCTTCTCGACATGCTGCCTCCCGTAGGAGT  
CTTCTGCA GCCTCCCTCGCGCCATCAGCTTCTGCACATGCTGCCTCCCGTAGGAGT  
CTTCTGGT GCCTCCCTCGCGCCATCAGCTTCTGGTCATGCTGCCTCCCGTAGGAGT  
CTTGACCT GCCTCCCTCGCGCCATCAGCTTGACCTCATGCTGCCTCCCGTAGGAGT  
CTTGACGA GCCTCCCTCGCGCCATCAGCTTGACGACATGCTGCCTCCCGTAGGAGT  
CTTGAGCA GCCTCCCTCGCGCCATCAGCTTGAGCACATGCTGCCTCCCGTAGGAGT  
CTTGAGGT GCCTCCCTCGCGCCATCAGCTTGAGGTCATGCTGCCTCCCGTAGGAGT  
CTTGCAAG GCCTCCCTCGCGCCATCAGCTTGCAAGCATGCTGCCTCCCGTAGGAGT  
CTTGATC GCCTCCCTCGCGCCATCAGCTTGATCCATGCTGCCTCCCGTAGGAGT  
CTTGCTAC GCCTCCCTCGCGCCATCAGCTTGCTACCATGCTGCCTCCCGTAGGAGT  
CTTGCTTG GCCTCCCTCGCGCCATCAGCTTGCTTGCATGCTGCCTCCCGTAGGAGT  
CTTGGAAC GCCTCCCTCGCGCCATCAGCTTGGAACCATGCTGCCTCCCGTAGGAGT  
CTTGATG GCCTCCCTCGCGCCATCAGCTTGATGCATGCTGCCTCCCGTAGGAGT

CTTGGTAG GCCTCCCTCGCGCCATCAGCTTGGTAGCATGCTGCCTCCCGTAGGAGT  
CTTGGTTC GCCTCCCTCGCGCCATCAGCTTGGTTCCATGCTGCCTCCCGTAGGAGT  
CTTGTCCA GCCTCCCTCGCGCCATCAGCTTGTCCACATGCTGCCTCCCGTAGGAGT  
CTTGTTCG GCCTCCCTCGCGCCATCAGCTTGTTCGTCATGCTGCCTCCCGTAGGAGT  
CTTGTGCT GCCTCCCTCGCGCCATCAGCTTGTGCTCATGCTGCCTCCCGTAGGAGT  
CTTGTGGA GCCTCCCTCGCGCCATCAGCTTGTGGACATGCTGCCTCCCGTAGGAGT  
GAACACCT GCCTCCCTCGCGCCATCAGGAACACCTCATGCTGCCTCCCGTAGGAGT  
GAACACGA GCCTCCCTCGCGCCATCAGGAACACGACATGCTGCCTCCCGTAGGAGT  
GAACAGCA GCCTCCCTCGCGCCATCAGGAACAGCACATGCTGCCTCCCGTAGGAGT  
GAACAGGT GCCTCCCTCGCGCCATCAGGAACAGGTCATGCTGCCTCCCGTAGGAGT  
GAACCAAG GCCTCCCTCGCGCCATCAGGAACCAAGCATGCTGCCTCCCGTAGGAGT  
GAACCATC GCCTCCCTCGCGCCATCAGGAACCATCCATGCTGCCTCCCGTAGGAGT  
GAACCTAC GCCTCCCTCGCGCCATCAGGAACCTACCATGCTGCCTCCCGTAGGAGT  
GAACCTTG GCCTCCCTCGCGCCATCAGGAACCTTGCATGCTGCCTCCCGTAGGAGT  
GAACGAAC GCCTCCCTCGCGCCATCAGGAACGAACCATGCTGCCTCCCGTAGGAGT  
GAACGATG GCCTCCCTCGCGCCATCAGGAACGATGCATGCTGCCTCCCGTAGGAGT  
GAACGTAG GCCTCCCTCGCGCCATCAGGAACGTAGCATGCTGCCTCCCGTAGGAGT  
GAACGTTT GCCTCCCTCGCGCCATCAGGAACGTTCCATGCTGCCTCCCGTAGGAGT  
GAACTCCA GCCTCCCTCGCGCCATCAGGAACCTCCACATGCTGCCTCCCGTAGGAGT  
GAACTCGT GCCTCCCTCGCGCCATCAGGAACCTCGTCATGCTGCCTCCCGTAGGAGT  
GAACTGCT GCCTCCCTCGCGCCATCAGGAACCTGTCATGCTGCCTCCCGTAGGAGT  
GAACTGGA GCCTCCCTCGCGCCATCAGGAACCTGGACATGCTGCCTCCCGTAGGAGT  
GAAGACCA GCCTCCCTCGCGCCATCAGGAAGACCACATGCTGCCTCCCGTAGGAGT  
GAAGACGT GCCTCCCTCGCGCCATCAGGAAGACGTCATGCTGCCTCCCGTAGGAGT  
GAAGAGCT GCCTCCCTCGCGCCATCAGGAAGAGCTCATGCTGCCTCCCGTAGGAGT  
GAAGAGGA GCCTCCCTCGCGCCATCAGGAAGAGGACATGCTGCCTCCCGTAGGAGT  
GAAGCAAC GCCTCCCTCGCGCCATCAGGAAGCAACCATGCTGCCTCCCGTAGGAGT  
GAAGCATG GCCTCCCTCGCGCCATCAGGAAGCATGCATGCTGCCTCCCGTAGGAGT  
GAAGCTAG GCCTCCCTCGCGCCATCAGGAAGCTAGCATGCTGCCTCCCGTAGGAGT  
GAAGCTTC GCCTCCCTCGCGCCATCAGGAAGCTTCCATGCTGCCTCCCGTAGGAGT  
GAAGGAAG GCCTCCCTCGCGCCATCAGGAAGGAAGCATGCTGCCTCCCGTAGGAGT  
GAAGGATC GCCTCCCTCGCGCCATCAGGAAGGATCCATGCTGCCTCCCGTAGGAGT  
GAAGGTAC GCCTCCCTCGCGCCATCAGGAAGGTACCATGCTGCCTCCCGTAGGAGT  
GAAGGTTG GCCTCCCTCGCGCCATCAGGAAGGTTGCATGCTGCCTCCCGTAGGAGT  
GAAGTCCT GCCTCCCTCGCGCCATCAGGAAGTCCTCATGCTGCCTCCCGTAGGAGT  
GAAGTCGA GCCTCCCTCGCGCCATCAGGAAGTCGACATGCTGCCTCCCGTAGGAGT  
GAAGTGCA GCCTCCCTCGCGCCATCAGGAAGTGCACATGCTGCCTCCCGTAGGAGT  
GAAGTGGT GCCTCCCTCGCGCCATCAGGAAGTGGTCATGCTGCCTCCCGTAGGAGT  
GACAACAG GCCTCCCTCGCGCCATCAGGACAACAGCATGCTGCCTCCCGTAGGAGT  
GACAACCT GCCTCCCTCGCGCCATCAGGACAACCTCCATGCTGCCTCCCGTAGGAGT  
GACAAGAC GCCTCCCTCGCGCCATCAGGACAAGACCATGCTGCCTCCCGTAGGAGT  
GACAAGTG GCCTCCCTCGCGCCATCAGGACAAGTGCATGCTGCCTCCCGTAGGAGT  
GACACACT GCCTCCCTCGCGCCATCAGGACACACTCATGCTGCCTCCCGTAGGAGT  
GACACAGA GCCTCCCTCGCGCCATCAGGACACAGACATGCTGCCTCCCGTAGGAGT  
GACACTCA GCCTCCCTCGCGCCATCAGGACACTCACATGCTGCCTCCCGTAGGAGT  
GACACTGT GCCTCCCTCGCGCCATCAGGACACTGTCATGCTGCCTCCCGTAGGAGT  
GACAGACA GCCTCCCTCGCGCCATCAGGACAGACACATGCTGCCTCCCGTAGGAGT  
GACAGAGT GCCTCCCTCGCGCCATCAGGACAGAGTCATGCTGCCTCCCGTAGGAGT  
GACAGTCT GCCTCCCTCGCGCCATCAGGACAGTCTCATGCTGCCTCCCGTAGGAGT

GACAGTGA GCCTCCCTCGCGCCATCAGGACAGTGACATGCTGCCTCCCGTAGGAGT  
GACATCAC GCCTCCCTCGCGCCATCAGGACATCACCATGCTGCCTCCCGTAGGAGT  
GACATCTG GCCTCCCTCGCGCCATCAGGACATCTGCATGCTGCCTCCCGTAGGAGT  
GACATGAG GCCTCCCTCGCGCCATCAGGACATGAGCATGCTGCCTCCCGTAGGAGT  
GACATGTC GCCTCCCTCGCGCCATCAGGACATGTCCATGCTGCCTCCCGTAGGAGT  
GACTACAC GCCTCCCTCGCGCCATCAGGACTACACCATGCTGCCTCCCGTAGGAGT  
GACTACTG GCCTCCCTCGCGCCATCAGGACTACTGCATGCTGCCTCCCGTAGGAGT  
GACTAGAG GCCTCCCTCGCGCCATCAGGACTAGAGCATGCTGCCTCCCGTAGGAGT  
GACTAGTC GCCTCCCTCGCGCCATCAGGACTAGTCCATGCTGCCTCCCGTAGGAGT  
GACTCACA GCCTCCCTCGCGCCATCAGGACTCACACATGCTGCCTCCCGTAGGAGT  
GACTCAGT GCCTCCCTCGCGCCATCAGGACTCAGTCATGCTGCCTCCCGTAGGAGT  
GACTCTCT GCCTCCCTCGCGCCATCAGGACTCTCTCATGCTGCCTCCCGTAGGAGT  
GACTCTGA GCCTCCCTCGCGCCATCAGGACTCTGACATGCTGCCTCCCGTAGGAGT  
GACTGACT GCCTCCCTCGCGCCATCAGGACTGACTCATGCTGCCTCCCGTAGGAGT  
GACTGAGA GCCTCCCTCGCGCCATCAGGACTGAGACATGCTGCCTCCCGTAGGAGT  
GACTGTCA GCCTCCCTCGCGCCATCAGGACTGTCACATGCTGCCTCCCGTAGGAGT  
GACTGTGT GCCTCCCTCGCGCCATCAGGACTGTGTCATGCTGCCTCCCGTAGGAGT  
GACTTCAG GCCTCCCTCGCGCCATCAGGACTTCAGCATGCTGCCTCCCGTAGGAGT  
GACTTCTC GCCTCCCTCGCGCCATCAGGACTTCTCCATGCTGCCTCCCGTAGGAGT  
GACTTGAC GCCTCCCTCGCGCCATCAGGACTTGACCATGCTGCCTCCCGTAGGAGT  
GACTTGTG GCCTCCCTCGCGCCATCAGGACTTGTGCATGCTGCCTCCCGTAGGAGT  
GAGAACAC GCCTCCCTCGCGCCATCAGGAGAACACCATGCTGCCTCCCGTAGGAGT  
GAGAACTG GCCTCCCTCGCGCCATCAGGAGAACTGCATGCTGCCTCCCGTAGGAGT  
GAGAAGAG GCCTCCCTCGCGCCATCAGGAGAAGAGCATGCTGCCTCCCGTAGGAGT  
GAGAAGTC GCCTCCCTCGCGCCATCAGGAGAAGTCCATGCTGCCTCCCGTAGGAGT  
GAGACACA GCCTCCCTCGCGCCATCAGGAGACACACATGCTGCCTCCCGTAGGAGT  
GAGACAGT GCCTCCCTCGCGCCATCAGGAGACAGTCATGCTGCCTCCCGTAGGAGT  
GAGACTCT GCCTCCCTCGCGCCATCAGGAGACTCTCATGCTGCCTCCCGTAGGAGT  
GAGACTGA GCCTCCCTCGCGCCATCAGGAGACTGACATGCTGCCTCCCGTAGGAGT  
GAGAGACT GCCTCCCTCGCGCCATCAGGAGAGACTCATGCTGCCTCCCGTAGGAGT  
GAGAGAGA GCCTCCCTCGCGCCATCAGGAGAGAGACATGCTGCCTCCCGTAGGAGT  
GAGAGTCA GCCTCCCTCGCGCCATCAGGAGAGTCCATGCTGCCTCCCGTAGGAGT  
GAGAGTGT GCCTCCCTCGCGCCATCAGGAGAGTGTGCATGCTGCCTCCCGTAGGAGT  
GAGATCAG GCCTCCCTCGCGCCATCAGGAGATCAGCATGCTGCCTCCCGTAGGAGT  
GAGATCTC GCCTCCCTCGCGCCATCAGGAGATCTCCATGCTGCCTCCCGTAGGAGT  
GAGATGAC GCCTCCCTCGCGCCATCAGGAGATGACCATGCTGCCTCCCGTAGGAGT  
GAGATGTG GCCTCCCTCGCGCCATCAGGAGATGTGCATGCTGCCTCCCGTAGGAGT  
GAGTACAG GCCTCCCTCGCGCCATCAGGAGTACAGCATGCTGCCTCCCGTAGGAGT  
GAGTACTC GCCTCCCTCGCGCCATCAGGAGTACTCCATGCTGCCTCCCGTAGGAGT  
GAGTAGAC GCCTCCCTCGCGCCATCAGGAGTAGACCATGCTGCCTCCCGTAGGAGT  
GAGTAGTG GCCTCCCTCGCGCCATCAGGAGTAGTGCATGCTGCCTCCCGTAGGAGT  
GAGTCACT GCCTCCCTCGCGCCATCAGGAGTCACTCATGCTGCCTCCCGTAGGAGT  
GAGTCAGA GCCTCCCTCGCGCCATCAGGAGTACAGACATGCTGCCTCCCGTAGGAGT  
GAGTCTCA GCCTCCCTCGCGCCATCAGGAGTCTCACATGCTGCCTCCCGTAGGAGT  
GAGTCTGT GCCTCCCTCGCGCCATCAGGAGTCTGTCATGCTGCCTCCCGTAGGAGT  
GAGTGACA GCCTCCCTCGCGCCATCAGGAGTGACACATGCTGCCTCCCGTAGGAGT  
GAGTGAGT GCCTCCCTCGCGCCATCAGGAGTGAGTCATGCTGCCTCCCGTAGGAGT  
GAGTGTCT GCCTCCCTCGCGCCATCAGGAGTGTCTCATGCTGCCTCCCGTAGGAGT  
GAGTGTGA GCCTCCCTCGCGCCATCAGGAGTGTGACATGCTGCCTCCCGTAGGAGT

GAGTTCAC GCCTCCCTCGCGCCATCAGGAGTTCACCATGCTGCCTCCCGTAGGAGT  
GAGTTCTG GCCTCCCTCGCGCCATCAGGAGTTCTGCATGCTGCCTCCCGTAGGAGT  
GAGTTGAG GCCTCCCTCGCGCCATCAGGAGTTGAGCATGCTGCCTCCCGTAGGAGT  
GAGTTGTC GCCTCCCTCGCGCCATCAGGAGTTGTCCATGCTGCCTCCCGTAGGAGT  
GATCACCA GCCTCCCTCGCGCCATCAGGATCACCATGCTGCCTCCCGTAGGAGT  
GATCACGT GCCTCCCTCGCGCCATCAGGATCACGTCATGCTGCCTCCCGTAGGAGT  
GATCAGCT GCCTCCCTCGCGCCATCAGGATCAGCTCATGCTGCCTCCCGTAGGAGT  
GATCAGGA GCCTCCCTCGCGCCATCAGGATCAGGACATGCTGCCTCCCGTAGGAGT  
GATCCAAC GCCTCCCTCGCGCCATCAGGATCCAACCATGCTGCCTCCCGTAGGAGT  
GATCCATG GCCTCCCTCGCGCCATCAGGATCCATGCATGCTGCCTCCCGTAGGAGT  
GATCCTAG GCCTCCCTCGCGCCATCAGGATCCTAGCATGCTGCCTCCCGTAGGAGT  
GATCCTTC GCCTCCCTCGCGCCATCAGGATCCTTCCATGCTGCCTCCCGTAGGAGT  
GATCGAAG GCCTCCCTCGCGCCATCAGGATCGAAGCATGCTGCCTCCCGTAGGAGT  
GATCGATC GCCTCCCTCGCGCCATCAGGATCGATCCATGCTGCCTCCCGTAGGAGT  
GATCGTAC GCCTCCCTCGCGCCATCAGGATCGTACCATGCTGCCTCCCGTAGGAGT  
GATCGTTG GCCTCCCTCGCGCCATCAGGATCGTTGCATGCTGCCTCCCGTAGGAGT  
GATCTCCT GCCTCCCTCGCGCCATCAGGATCTCCTCATGCTGCCTCCCGTAGGAGT  
GATCTCGA GCCTCCCTCGCGCCATCAGGATCTCGACATGCTGCCTCCCGTAGGAGT  
GATCTGCA GCCTCCCTCGCGCCATCAGGATCTGCACATGCTGCCTCCCGTAGGAGT  
GATCTGGT GCCTCCCTCGCGCCATCAGGATCTGGTCATGCTGCCTCCCGTAGGAGT  
GATGACCT GCCTCCCTCGCGCCATCAGGATGACCTCATGCTGCCTCCCGTAGGAGT  
GATGACGA GCCTCCCTCGCGCCATCAGGATGACGACATGCTGCCTCCCGTAGGAGT  
GATGAGCA GCCTCCCTCGCGCCATCAGGATGAGCACATGCTGCCTCCCGTAGGAGT  
GATGAGGT GCCTCCCTCGCGCCATCAGGATGAGGTCATGCTGCCTCCCGTAGGAGT  
GATGCAAG GCCTCCCTCGCGCCATCAGGATGCAAGCATGCTGCCTCCCGTAGGAGT  
GATGCATC GCCTCCCTCGCGCCATCAGGATGCATCCATGCTGCCTCCCGTAGGAGT  
GATGCTAC GCCTCCCTCGCGCCATCAGGATGCTACCATGCTGCCTCCCGTAGGAGT  
GATGCTTG GCCTCCCTCGCGCCATCAGGATGCTTGCATGCTGCCTCCCGTAGGAGT  
GATGGAAC GCCTCCCTCGCGCCATCAGGATGGAACCATGCTGCCTCCCGTAGGAGT  
GATGGATG GCCTCCCTCGCGCCATCAGGATGGATGCATGCTGCCTCCCGTAGGAGT  
GATGGTAG GCCTCCCTCGCGCCATCAGGATGGTAGCATGCTGCCTCCCGTAGGAGT  
GATGGTTC GCCTCCCTCGCGCCATCAGGATGGTTCCATGCTGCCTCCCGTAGGAGT  
GATGTCCA GCCTCCCTCGCGCCATCAGGATGTCCACATGCTGCCTCCCGTAGGAGT  
GATGTCTG GCCTCCCTCGCGCCATCAGGATGTCTCATGCTGCCTCCCGTAGGAGT  
GATGTGGA GCCTCCCTCGCGCCATCAGGATGTGGACATGCTGCCTCCCGTAGGAGT  
GCAACCAT GCCTCCCTCGCGCCATCAGGCAACCATCATGCTGCCTCCCGTAGGAGT  
GCAACCTA GCCTCCCTCGCGCCATCAGGCAACCTACATGCTGCCTCCCGTAGGAGT  
GCAACGAA GCCTCCCTCGCGCCATCAGGCAACGAACATGCTGCCTCCCGTAGGAGT  
GCAACGTT GCCTCCCTCGCGCCATCAGGCAACGTTTCATGCTGCCTCCCGTAGGAGT  
GCAAGCAA GCCTCCCTCGCGCCATCAGGCAAGCAACATGCTGCCTCCCGTAGGAGT  
GCAAGCTT GCCTCCCTCGCGCCATCAGGCAAGCTTCATGCTGCCTCCCGTAGGAGT  
GCAAGGAT GCCTCCCTCGCGCCATCAGGCAAGGATCATGCTGCCTCCCGTAGGAGT  
GCAAGGTA GCCTCCCTCGCGCCATCAGGCAAGGTACATGCTGCCTCCCGTAGGAGT  
GCAATACC GCCTCCCTCGCGCCATCAGGCAATACCCATGCTGCCTCCCGTAGGAGT  
GCAATAGG GCCTCCCTCGCGCCATCAGGCAATAGGCATGCTGCCTCCCGTAGGAGT  
GCAATTCG GCCTCCCTCGCGCCATCAGGCAATTGCGATGCTGCCTCCCGTAGGAGT  
GCAATTGC GCCTCCCTCGCGCCATCAGGCAATTGCCATGCTGCCTCCCGTAGGAGT  
GCATAACC GCCTCCCTCGCGCCATCAGGCATAACCCATGCTGCCTCCCGTAGGAGT

GCATAAGG GCCTCCCTCGCGCCATCAGGCATAAGGCATGCTGCCTCCCGTAGGAGT  
GCATATCG GCCTCCCTCGCGCCATCAGGCATATCGCATGCTGCCTCCCGTAGGAGT  
GCATATGC GCCTCCCTCGCGCCATCAGGCATATGCCATGCTGCCTCCCGTAGGAGT  
GCATCCAA GCCTCCCTCGCGCCATCAGGCATCCAACATGCTGCCTCCCGTAGGAGT  
GCATCCTT GCCTCCCTCGCGCCATCAGGCATCCTTCATGCTGCCTCCCGTAGGAGT  
GCATCGAT GCCTCCCTCGCGCCATCAGGCATCGATCATGCTGCCTCCCGTAGGAGT  
GCATCGTA GCCTCCCTCGCGCCATCAGGCATCGTACATGCTGCCTCCCGTAGGAGT  
GCATGCAT GCCTCCCTCGCGCCATCAGGCATGCATCATGCTGCCTCCCGTAGGAGT  
GCATGCTA GCCTCCCTCGCGCCATCAGGCATGCTACATGCTGCCTCCCGTAGGAGT  
GCATGGAA GCCTCCCTCGCGCCATCAGGCATGGAACATGCTGCCTCCCGTAGGAGT  
GCATGGTT GCCTCCCTCGCGCCATCAGGCATGGTTCATGCTGCCTCCCGTAGGAGT  
GCATTACG GCCTCCCTCGCGCCATCAGGCATTACGCATGCTGCCTCCCGTAGGAGT  
GCATTAGC GCCTCCCTCGCGCCATCAGGCATTAGCCATGCTGCCTCCCGTAGGAGT  
GCCGAATT GCCTCCCTCGCGCCATCAGGCCGAATTCATGCTGCCTCCCGTAGGAGT  
GCCGATAT GCCTCCCTCGCGCCATCAGGCCGATATCATGCTGCCTCCCGTAGGAGT  
GCCGATTA GCCTCCCTCGCGCCATCAGGCCGATTACATGCTGCCTCCCGTAGGAGT  
GCCGTAAT GCCTCCCTCGCGCCATCAGGCCGTAATCATGCTGCCTCCCGTAGGAGT  
GCCGTATA GCCTCCCTCGCGCCATCAGGCCGTATACATGCTGCCTCCCGTAGGAGT  
GCCGTTAA GCCTCCCTCGCGCCATCAGGCCGTTAACATGCTGCCTCCCGTAGGAGT  
GCGCAATT GCCTCCCTCGCGCCATCAGGCCGCAATTCATGCTGCCTCCCGTAGGAGT  
GCGCATAT GCCTCCCTCGCGCCATCAGGCCGCATATCATGCTGCCTCCCGTAGGAGT  
GCGCATT A GCCTCCCTCGCGCCATCAGGCCGATTACATGCTGCCTCCCGTAGGAGT  
GCGCTAAT GCCTCCCTCGCGCCATCAGGCCGCTAATCATGCTGCCTCCCGTAGGAGT  
GCGCTATA GCCTCCCTCGCGCCATCAGGCCGCTATACATGCTGCCTCCCGTAGGAGT  
GCGCTTAA GCCTCCCTCGCGCCATCAGGCCGCTAACATGCTGCCTCCCGTAGGAGT  
GCGGAATA GCCTCCCTCGCGCCATCAGGCCGGAATACATGCTGCCTCCCGTAGGAGT  
GCGGATAA GCCTCCCTCGCGCCATCAGGCCGGATAACATGCTGCCTCCCGTAGGAGT  
GCGGTATT GCCTCCCTCGCGCCATCAGGCCGGTATTTCATGCTGCCTCCCGTAGGAGT  
GCGGTTAT GCCTCCCTCGCGCCATCAGGCCGGTTATCATGCTGCCTCCCGTAGGAGT  
GCTAATCG GCCTCCCTCGCGCCATCAGGCTAATCGCATGCTGCCTCCCGTAGGAGT  
GCTAATGC GCCTCCCTCGCGCCATCAGGCTAATGCCATGCTGCCTCCCGTAGGAGT  
GCTACCAA GCCTCCCTCGCGCCATCAGGCTACCAACATGCTGCCTCCCGTAGGAGT  
GCTACCTT GCCTCCCTCGCGCCATCAGGCTACCTTCATGCTGCCTCCCGTAGGAGT  
GCTACGAT GCCTCCCTCGCGCCATCAGGCTACGATCATGCTGCCTCCCGTAGGAGT  
GCTACGTA GCCTCCCTCGCGCCATCAGGCTACGTACATGCTGCCTCCCGTAGGAGT  
GCTAGCAT GCCTCCCTCGCGCCATCAGGCTAGCATCATGCTGCCTCCCGTAGGAGT  
GCTAGCTA GCCTCCCTCGCGCCATCAGGCTAGCTACATGCTGCCTCCCGTAGGAGT  
GCTAGGAA GCCTCCCTCGCGCCATCAGGCTAGGAACATGCTGCCTCCCGTAGGAGT  
GCTAGGTT GCCTCCCTCGCGCCATCAGGCTAGGTTTCATGCTGCCTCCCGTAGGAGT  
GCTATACG GCCTCCCTCGCGCCATCAGGCTATACGCATGCTGCCTCCCGTAGGAGT  
GCTATAGC GCCTCCCTCGCGCCATCAGGCTATAGCCATGCTGCCTCCCGTAGGAGT  
GCTATTCC GCCTCCCTCGCGCCATCAGGCTATTCCCATGCTGCCTCCCGTAGGAGT  
GCTATTGG GCCTCCCTCGCGCCATCAGGCTATTGGCATGCTGCCTCCCGTAGGAGT  
GCTTAACG GCCTCCCTCGCGCCATCAGGCTTAACGCATGCTGCCTCCCGTAGGAGT  
GCTTAAGC GCCTCCCTCGCGCCATCAGGCTTAAGCCATGCTGCCTCCCGTAGGAGT  
GCTTATCC GCCTCCCTCGCGCCATCAGGCTTATCCCATGCTGCCTCCCGTAGGAGT  
GCTTATGG GCCTCCCTCGCGCCATCAGGCTTATGGCATGCTGCCTCCCGTAGGAGT  
GCTTCCAT GCCTCCCTCGCGCCATCAGGCTTCCATCATGCTGCCTCCCGTAGGAGT  
GCTTCTA GCCTCCCTCGCGCCATCAGGCTTCTACATGCTGCCTCCCGTAGGAGT

GCTTCGAA GCCTCCCTCGCGCCATCAGGCTTCGAACATGCTGCCTCCCGTAGGAGT  
GCTTCGTT GCCTCCCTCGCGCCATCAGGCTTCGTTTCATGCTGCCTCCCGTAGGAGT  
GCTTGCAA GCCTCCCTCGCGCCATCAGGCTTGCAACATGCTGCCTCCCGTAGGAGT  
GCTTGCTT GCCTCCCTCGCGCCATCAGGCTTGCTTCATGCTGCCTCCCGTAGGAGT  
GCTTGGAT GCCTCCCTCGCGCCATCAGGCTTGATCATGCTGCCTCCCGTAGGAGT  
GCTTGGTA GCCTCCCTCGCGCCATCAGGCTTGGTACATGCTGCCTCCCGTAGGAGT  
GGAACCAA GCCTCCCTCGCGCCATCAGGGAACCAACATGCTGCCTCCCGTAGGAGT  
GGAACCTT GCCTCCCTCGCGCCATCAGGGAACCTTCATGCTGCCTCCCGTAGGAGT  
GGAACGAT GCCTCCCTCGCGCCATCAGGGAACGATCATGCTGCCTCCCGTAGGAGT  
GGAACGTA GCCTCCCTCGCGCCATCAGGGAACGTACATGCTGCCTCCCGTAGGAGT  
GGAAGCAT GCCTCCCTCGCGCCATCAGGGAAGCATCATGCTGCCTCCCGTAGGAGT  
GGAAGCTA GCCTCCCTCGCGCCATCAGGGAAGCTACATGCTGCCTCCCGTAGGAGT  
GGAAGGAA GCCTCCCTCGCGCCATCAGGGAAGGAACATGCTGCCTCCCGTAGGAGT  
GGAAGGTT GCCTCCCTCGCGCCATCAGGGAAGGTTTCATGCTGCCTCCCGTAGGAGT  
GGAATACG GCCTCCCTCGCGCCATCAGGGAATACGCATGCTGCCTCCCGTAGGAGT  
GGAATAGC GCCTCCCTCGCGCCATCAGGGAATAGCCATGCTGCCTCCCGTAGGAGT  
GGAATTCC GCCTCCCTCGCGCCATCAGGGAATCCCATGCTGCCTCCCGTAGGAGT  
GGAATTGG GCCTCCCTCGCGCCATCAGGGAATTGGCATGCTGCCTCCCGTAGGAGT  
GGATAACG GCCTCCCTCGCGCCATCAGGGATAACGCATGCTGCCTCCCGTAGGAGT  
GGATAAGC GCCTCCCTCGCGCCATCAGGGATAAGCCATGCTGCCTCCCGTAGGAGT  
GGATATCC GCCTCCCTCGCGCCATCAGGGATATCCCATGCTGCCTCCCGTAGGAGT  
GGATATGG GCCTCCCTCGCGCCATCAGGGATATGGCATGCTGCCTCCCGTAGGAGT  
GGATCCAT GCCTCCCTCGCGCCATCAGGGATCCATCATGCTGCCTCCCGTAGGAGT  
GGATCCTA GCCTCCCTCGCGCCATCAGGGATCCTACATGCTGCCTCCCGTAGGAGT  
GGATCGAA GCCTCCCTCGCGCCATCAGGGATCGAACATGCTGCCTCCCGTAGGAGT  
GGATCGTT GCCTCCCTCGCGCCATCAGGGATCGTTTCATGCTGCCTCCCGTAGGAGT  
GGATGCAA GCCTCCCTCGCGCCATCAGGGATGCAACATGCTGCCTCCCGTAGGAGT  
GGATGCTT GCCTCCCTCGCGCCATCAGGGATGCTTCATGCTGCCTCCCGTAGGAGT  
GGATGGAT GCCTCCCTCGCGCCATCAGGGATGGATCATGCTGCCTCCCGTAGGAGT  
GGATGGTA GCCTCCCTCGCGCCATCAGGGATGGTACATGCTGCCTCCCGTAGGAGT  
GGATTACC GCCTCCCTCGCGCCATCAGGGATTACCCATGCTGCCTCCCGTAGGAGT  
GGATTAGG GCCTCCCTCGCGCCATCAGGGATTAGGCATGCTGCCTCCCGTAGGAGT  
GGCCAATT GCCTCCCTCGCGCCATCAGGGCCAATTCATGCTGCCTCCCGTAGGAGT  
GGCCATAT GCCTCCCTCGCGCCATCAGGGCCATATCATGCTGCCTCCCGTAGGAGT  
GGCCATTA GCCTCCCTCGCGCCATCAGGGCCATTACATGCTGCCTCCCGTAGGAGT  
GGCCTAAT GCCTCCCTCGCGCCATCAGGGCCTAATCATGCTGCCTCCCGTAGGAGT  
GGCCTATA GCCTCCCTCGCGCCATCAGGGCCTATACATGCTGCCTCCCGTAGGAGT  
GGCCTTAA GCCTCCCTCGCGCCATCAGGGCCTAACATGCTGCCTCCCGTAGGAGT  
GGCGAATA GCCTCCCTCGCGCCATCAGGGCGAATACATGCTGCCTCCCGTAGGAGT  
GGCGATAA GCCTCCCTCGCGCCATCAGGGCGATAACATGCTGCCTCCCGTAGGAGT  
GGCGTATT GCCTCCCTCGCGCCATCAGGGCGTATTCATGCTGCCTCCCGTAGGAGT  
GGCGTTAT GCCTCCCTCGCGCCATCAGGGCGTTATCATGCTGCCTCCCGTAGGAGT  
GGTAATCC GCCTCCCTCGCGCCATCAGGGTAATCCCATGCTGCCTCCCGTAGGAGT  
GGTAATGG GCCTCCCTCGCGCCATCAGGGTAATGGCATGCTGCCTCCCGTAGGAGT  
GGTACCAT GCCTCCCTCGCGCCATCAGGGTACCATCATGCTGCCTCCCGTAGGAGT  
GGTACCTA GCCTCCCTCGCGCCATCAGGGTACCTACATGCTGCCTCCCGTAGGAGT  
GGTACGAA GCCTCCCTCGCGCCATCAGGGTACGAACATGCTGCCTCCCGTAGGAGT  
GGTACGTT GCCTCCCTCGCGCCATCAGGGTACGTTTCATGCTGCCTCCCGTAGGAGT  
GGTAGCAA GCCTCCCTCGCGCCATCAGGGTAGCAACATGCTGCCTCCCGTAGGAGT

GGTAGCTT GCCTCCCTCGCGCCATCAGGGTAGCTTCATGCTGCCTCCCGTAGGAGT  
GGTAGGAT GCCTCCCTCGCGCCATCAGGGTAGGATCATGCTGCCTCCCGTAGGAGT  
GGTAGGTA GCCTCCCTCGCGCCATCAGGGTAGGTACATGCTGCCTCCCGTAGGAGT  
GGTATAAC GCCTCCCTCGCGCCATCAGGGTATACCCATGCTGCCTCCCGTAGGAGT  
GGTATAGG GCCTCCCTCGCGCCATCAGGGTATAGGCATGCTGCCTCCCGTAGGAGT  
GGTATTCG GCCTCCCTCGCGCCATCAGGGTATTGCATGCTGCCTCCCGTAGGAGT  
GGTATTGC GCCTCCCTCGCGCCATCAGGGTATTGCCATGCTGCCTCCCGTAGGAGT  
GGTTAACC GCCTCCCTCGCGCCATCAGGGTTAAGCCATGCTGCCTCCCGTAGGAGT  
GGTTAAGG GCCTCCCTCGCGCCATCAGGGTTAAGGCATGCTGCCTCCCGTAGGAGT  
GGTTATCG GCCTCCCTCGCGCCATCAGGGTTATCGCATGCTGCCTCCCGTAGGAGT  
GGTTATGC GCCTCCCTCGCGCCATCAGGGTTATGCCATGCTGCCTCCCGTAGGAGT  
GGTTCCAA GCCTCCCTCGCGCCATCAGGGTTCCAACATGCTGCCTCCCGTAGGAGT  
GGTTCCTT GCCTCCCTCGCGCCATCAGGGTTCCTTCATGCTGCCTCCCGTAGGAGT  
GGTTCGAT GCCTCCCTCGCGCCATCAGGGTTCGATCATGCTGCCTCCCGTAGGAGT  
GGTTCGTA GCCTCCCTCGCGCCATCAGGGTTCGTACATGCTGCCTCCCGTAGGAGT  
GGTTGCAT GCCTCCCTCGCGCCATCAGGGTTGCATCATGCTGCCTCCCGTAGGAGT  
GGTTGCTA GCCTCCCTCGCGCCATCAGGGTTGCTACATGCTGCCTCCCGTAGGAGT  
GGTTGGAA GCCTCCCTCGCGCCATCAGGGTTGGAACATGCTGCCTCCCGTAGGAGT  
GGTTGGTT GCCTCCCTCGCGCCATCAGGGTTGGTTCATGCTGCCTCCCGTAGGAGT  
GTACACCA GCCTCCCTCGCGCCATCAGGTACACCACATGCTGCCTCCCGTAGGAGT  
GTACACGT GCCTCCCTCGCGCCATCAGGTACACGTCATGCTGCCTCCCGTAGGAGT  
GTACAGCT GCCTCCCTCGCGCCATCAGGTACAGCTCATGCTGCCTCCCGTAGGAGT  
GTACAGGA GCCTCCCTCGCGCCATCAGGTACAGGACATGCTGCCTCCCGTAGGAGT  
GTACCAAC GCCTCCCTCGCGCCATCAGGTACCAACCATGCTGCCTCCCGTAGGAGT  
GTACCATG GCCTCCCTCGCGCCATCAGGTACCATGCATGCTGCCTCCCGTAGGAGT  
GTACCTAG GCCTCCCTCGCGCCATCAGGTACCTAGCATGCTGCCTCCCGTAGGAGT  
GTACCTTC GCCTCCCTCGCGCCATCAGGTACCTTCCATGCTGCCTCCCGTAGGAGT  
GTACGAAG GCCTCCCTCGCGCCATCAGGTACGAAGCATGCTGCCTCCCGTAGGAGT  
GTACGATC GCCTCCCTCGCGCCATCAGGTACGATCCATGCTGCCTCCCGTAGGAGT  
GTACGTAC GCCTCCCTCGCGCCATCAGGTACGTACCATGCTGCCTCCCGTAGGAGT  
GTACGTTG GCCTCCCTCGCGCCATCAGGTACGTTGCATGCTGCCTCCCGTAGGAGT  
GTA CTCT GCCTCCCTCGCGCCATCAGGTACTCCTCATGCTGCCTCCCGTAGGAGT  
GTA CTGA GCCTCCCTCGCGCCATCAGGTACTCGACATGCTGCCTCCCGTAGGAGT  
GTA CTGCA GCCTCCCTCGCGCCATCAGGTACTGCACATGCTGCCTCCCGTAGGAGT  
GTA CTGGT GCCTCCCTCGCGCCATCAGGTACTGGTCATGCTGCCTCCCGTAGGAGT  
GTAGACCT GCCTCCCTCGCGCCATCAGGTAGACCTCATGCTGCCTCCCGTAGGAGT  
GTAGACGA GCCTCCCTCGCGCCATCAGGTAGACGACATGCTGCCTCCCGTAGGAGT  
GTAGAGCA GCCTCCCTCGCGCCATCAGGTAGAGCACATGCTGCCTCCCGTAGGAGT  
GTAGAGGT GCCTCCCTCGCGCCATCAGGTAGAGGTCATGCTGCCTCCCGTAGGAGT  
GTAGCAAG GCCTCCCTCGCGCCATCAGGTAGCAAGCATGCTGCCTCCCGTAGGAGT  
GTAGCATC GCCTCCCTCGCGCCATCAGGTAGCATCCATGCTGCCTCCCGTAGGAGT  
GTAGCTAC GCCTCCCTCGCGCCATCAGGTAGCTACCATGCTGCCTCCCGTAGGAGT  
GTAGCTTG GCCTCCCTCGCGCCATCAGGTAGCTTGTCATGCTGCCTCCCGTAGGAGT  
GTAGGAAC GCCTCCCTCGCGCCATCAGGTAGGAACCATGCTGCCTCCCGTAGGAGT  
GTAGGATG GCCTCCCTCGCGCCATCAGGTAGGATGCATGCTGCCTCCCGTAGGAGT  
GTAGGTAG GCCTCCCTCGCGCCATCAGGTAGGTAGCATGCTGCCTCCCGTAGGAGT  
GTAGGTTC GCCTCCCTCGCGCCATCAGGTAGGTTCCATGCTGCCTCCCGTAGGAGT  
GTAGTCCA GCCTCCCTCGCGCCATCAGGTAGTCCACATGCTGCCTCCCGTAGGAGT  
GTAGTCGT GCCTCCCTCGCGCCATCAGGTAGTCGTTCATGCTGCCTCCCGTAGGAGT



GTAGTGCT GCCTCCCTCGCGCCATCAGGTAGTGCTCATGCTGCCTCCCGTAGGAGT  
GTAGTGGA GCCTCCCTCGCGCCATCAGGTAGTGGACATGCTGCCTCCCGTAGGAGT  
GTCAACAC GCCTCCCTCGCGCCATCAGGTCAACACCATGCTGCCTCCCGTAGGAGT  
GTCAACTG GCCTCCCTCGCGCCATCAGGTCAACTGCATGCTGCCTCCCGTAGGAGT  
GTCAAGAG GCCTCCCTCGCGCCATCAGGTCAAGAGCATGCTGCCTCCCGTAGGAGT  
GTCAAGTC GCCTCCCTCGCGCCATCAGGTCAAGTCCATGCTGCCTCCCGTAGGAGT  
GTCACACA GCCTCCCTCGCGCCATCAGGTCACACACATGCTGCCTCCCGTAGGAGT  
GTCACAGT GCCTCCCTCGCGCCATCAGGTCACAGTCATGCTGCCTCCCGTAGGAGT  
GTCACTCT GCCTCCCTCGCGCCATCAGGTCACTCTCATGCTGCCTCCCGTAGGAGT  
GTCACTGA GCCTCCCTCGCGCCATCAGGTCACTGACATGCTGCCTCCCGTAGGAGT  
GTCAGACT GCCTCCCTCGCGCCATCAGGTCAGACTCATGCTGCCTCCCGTAGGAGT  
GTCAGAGA GCCTCCCTCGCGCCATCAGGTCAGAGACATGCTGCCTCCCGTAGGAGT  
GTCAGTCA GCCTCCCTCGCGCCATCAGGTCAGTCACATGCTGCCTCCCGTAGGAGT  
GTCAGTGT GCCTCCCTCGCGCCATCAGGTCAGTGTCATGCTGCCTCCCGTAGGAGT  
GTCATCAG GCCTCCCTCGCGCCATCAGGTCATCAGCATGCTGCCTCCCGTAGGAGT  
GTCATCTC GCCTCCCTCGCGCCATCAGGTCATCTCCATGCTGCCTCCCGTAGGAGT  
GTCATGAC GCCTCCCTCGCGCCATCAGGTCATGACCATGCTGCCTCCCGTAGGAGT  
GTCATGTG GCCTCCCTCGCGCCATCAGGTCATGTGCATGCTGCCTCCCGTAGGAGT  
GTCTACAG GCCTCCCTCGCGCCATCAGGTCCTACAGCATGCTGCCTCCCGTAGGAGT  
GTCTACTC GCCTCCCTCGCGCCATCAGGTCCTACTCCATGCTGCCTCCCGTAGGAGT  
GTCTAGAC GCCTCCCTCGCGCCATCAGGTCCTAGACCATGCTGCCTCCCGTAGGAGT  
GTCTAGTG GCCTCCCTCGCGCCATCAGGTCCTAGTGCATGCTGCCTCCCGTAGGAGT  
GTCTCACT GCCTCCCTCGCGCCATCAGGTCCTCACTCATGCTGCCTCCCGTAGGAGT  
GTCTCAGA GCCTCCCTCGCGCCATCAGGTCCTCAGACATGCTGCCTCCCGTAGGAGT  
GTCTCTCA GCCTCCCTCGCGCCATCAGGTCCTCTCACATGCTGCCTCCCGTAGGAGT  
GTCTCTGT GCCTCCCTCGCGCCATCAGGTCCTGTGCATGCTGCCTCCCGTAGGAGT  
GTCTGACA GCCTCCCTCGCGCCATCAGGTCCTGACACATGCTGCCTCCCGTAGGAGT  
GTCTGAGT GCCTCCCTCGCGCCATCAGGTCCTGAGTCATGCTGCCTCCCGTAGGAGT  
GTCTGTCT GCCTCCCTCGCGCCATCAGGTCCTGTCTCATGCTGCCTCCCGTAGGAGT  
GTCTGTGA GCCTCCCTCGCGCCATCAGGTCCTGTGACATGCTGCCTCCCGTAGGAGT  
GTCTTAC GCCTCCCTCGCGCCATCAGGTCCTTACCATGCTGCCTCCCGTAGGAGT  
GTCTTCTG GCCTCCCTCGCGCCATCAGGTCCTTCTGCATGCTGCCTCCCGTAGGAGT  
GTCTTGAG GCCTCCCTCGCGCCATCAGGTCCTTGAGCATGCTGCCTCCCGTAGGAGT  
GTCTTGTC GCCTCCCTCGCGCCATCAGGTCCTTGCCATGCTGCCTCCCGTAGGAGT  
GTGAACAG GCCTCCCTCGCGCCATCAGGTGAACAGCATGCTGCCTCCCGTAGGAGT  
GTGAACTC GCCTCCCTCGCGCCATCAGGTGAACTCCATGCTGCCTCCCGTAGGAGT  
GTGAAGAC GCCTCCCTCGCGCCATCAGGTGAAGACCATGCTGCCTCCCGTAGGAGT  
GTGAAGTG GCCTCCCTCGCGCCATCAGGTGAAGTGCATGCTGCCTCCCGTAGGAGT  
GTGACACT GCCTCCCTCGCGCCATCAGGTGACACTCATGCTGCCTCCCGTAGGAGT  
GTGACAGA GCCTCCCTCGCGCCATCAGGTGACAGACATGCTGCCTCCCGTAGGAGT  
GTGACTCA GCCTCCCTCGCGCCATCAGGTGACTCACATGCTGCCTCCCGTAGGAGT  
GTGACTGT GCCTCCCTCGCGCCATCAGGTGACTGTCATGCTGCCTCCCGTAGGAGT  
GTGAGACA GCCTCCCTCGCGCCATCAGGTGAGACACATGCTGCCTCCCGTAGGAGT  
GTGAGAGT GCCTCCCTCGCGCCATCAGGTGAGAGTCATGCTGCCTCCCGTAGGAGT  
GTGAGTCT GCCTCCCTCGCGCCATCAGGTGAGTCTCATGCTGCCTCCCGTAGGAGT  
GTGAGTGA GCCTCCCTCGCGCCATCAGGTGAGTGACATGCTGCCTCCCGTAGGAGT  
GTGATCAC GCCTCCCTCGCGCCATCAGGTGATCACCATGCTGCCTCCCGTAGGAGT  
GTGATCTG GCCTCCCTCGCGCCATCAGGTGATCTGCATGCTGCCTCCCGTAGGAGT  
GTGATGAG GCCTCCCTCGCGCCATCAGGTGATGAGCATGCTGCCTCCCGTAGGAGT

GTGATGTC GCCTCCCTCGCGCCATCAGGTGATGTCCATGCTGCCTCCCGTAGGAGT  
GTGTACAC GCCTCCCTCGCGCCATCAGGTGTACACCATGCTGCCTCCCGTAGGAGT  
GTGTACTG GCCTCCCTCGCGCCATCAGGTGTACTGCATGCTGCCTCCCGTAGGAGT  
GTGTAGAG GCCTCCCTCGCGCCATCAGGTGTAGAGCATGCTGCCTCCCGTAGGAGT  
GTGTAGTC GCCTCCCTCGCGCCATCAGGTGTAGTCCATGCTGCCTCCCGTAGGAGT  
GTGTCACA GCCTCCCTCGCGCCATCAGGTGTACACATGCTGCCTCCCGTAGGAGT  
GTGTCAGT GCCTCCCTCGCGCCATCAGGTGTACATGCTGCCTCCCGTAGGAGT  
GTGTCTCT GCCTCCCTCGCGCCATCAGGTGTCTCTCATGCTGCCTCCCGTAGGAGT  
GTGTCTGA GCCTCCCTCGCGCCATCAGGTGTCTGACATGCTGCCTCCCGTAGGAGT  
GTGTGACT GCCTCCCTCGCGCCATCAGGTGTGACTCATGCTGCCTCCCGTAGGAGT  
GTGTGAGA GCCTCCCTCGCGCCATCAGGTGTGAGACATGCTGCCTCCCGTAGGAGT  
GTGTGTCA GCCTCCCTCGCGCCATCAGGTGTGTACATGCTGCCTCCCGTAGGAGT  
GTGTGTGT GCCTCCCTCGCGCCATCAGGTGTGTGTCATGCTGCCTCCCGTAGGAGT  
GTGTTAG GCCTCCCTCGCGCCATCAGGTGTTAGCATGCTGCCTCCCGTAGGAGT  
GTGTTCTC GCCTCCCTCGCGCCATCAGGTGTTCTCCATGCTGCCTCCCGTAGGAGT  
GTGTTGAC GCCTCCCTCGCGCCATCAGGTGTTGACCATGCTGCCTCCCGTAGGAGT  
GTGTTGTG GCCTCCCTCGCGCCATCAGGTGTTGTGCATGCTGCCTCCCGTAGGAGT  
GTTACCT GCCTCCCTCGCGCCATCAGGTTACCTCATGCTGCCTCCCGTAGGAGT  
GTTACGA GCCTCCCTCGCGCCATCAGGTTACGACATGCTGCCTCCCGTAGGAGT  
GTTAGCA GCCTCCCTCGCGCCATCAGGTTACAGCATGCTGCCTCCCGTAGGAGT  
GTTAGGT GCCTCCCTCGCGCCATCAGGTTACAGGTCATGCTGCCTCCCGTAGGAGT  
GTTCAAG GCCTCCCTCGCGCCATCAGGTTCCAAGCATGCTGCCTCCCGTAGGAGT  
GTTCCATC GCCTCCCTCGCGCCATCAGGTTCCATCCATGCTGCCTCCCGTAGGAGT  
GTTCTAC GCCTCCCTCGCGCCATCAGGTTCTACCATGCTGCCTCCCGTAGGAGT  
GTTCTTG GCCTCCCTCGCGCCATCAGGTTCTTGCATGCTGCCTCCCGTAGGAGT  
GTTCGAAC GCCTCCCTCGCGCCATCAGGTTCTGAACCATGCTGCCTCCCGTAGGAGT  
GTTCGATG GCCTCCCTCGCGCCATCAGGTTCTGATGCATGCTGCCTCCCGTAGGAGT  
GTTCGTAG GCCTCCCTCGCGCCATCAGGTTCTGTAGCATGCTGCCTCCCGTAGGAGT  
GTTCGTTC GCCTCCCTCGCGCCATCAGGTTCTGTTCCATGCTGCCTCCCGTAGGAGT  
GTTCTCCA GCCTCCCTCGCGCCATCAGGTTCTCCACATGCTGCCTCCCGTAGGAGT  
GTTCTCGT GCCTCCCTCGCGCCATCAGGTTCTCGTCATGCTGCCTCCCGTAGGAGT  
GTTCTGCT GCCTCCCTCGCGCCATCAGGTTCTGCTCATGCTGCCTCCCGTAGGAGT  
GTTCTGGA GCCTCCCTCGCGCCATCAGGTTCTGGACATGCTGCCTCCCGTAGGAGT  
GTTGACCA GCCTCCCTCGCGCCATCAGGTTGACCACATGCTGCCTCCCGTAGGAGT  
GTTGACGT GCCTCCCTCGCGCCATCAGGTTGACGTCATGCTGCCTCCCGTAGGAGT  
GTTGAGCT GCCTCCCTCGCGCCATCAGGTTGAGCTCATGCTGCCTCCCGTAGGAGT  
GTTGAGGA GCCTCCCTCGCGCCATCAGGTTGAGGACATGCTGCCTCCCGTAGGAGT  
GTTGCAAC GCCTCCCTCGCGCCATCAGGTTGCAACCATGCTGCCTCCCGTAGGAGT  
GTTGCATG GCCTCCCTCGCGCCATCAGGTTGCATGCATGCTGCCTCCCGTAGGAGT  
GTTGCTAG GCCTCCCTCGCGCCATCAGGTTGCTAGCATGCTGCCTCCCGTAGGAGT  
GTTGCTTC GCCTCCCTCGCGCCATCAGGTTGCTTCCATGCTGCCTCCCGTAGGAGT  
GTTGGAAG GCCTCCCTCGCGCCATCAGGTTGGAAGCATGCTGCCTCCCGTAGGAGT  
GTTGGATC GCCTCCCTCGCGCCATCAGGTTGGATCCATGCTGCCTCCCGTAGGAGT  
GTTGGTAC GCCTCCCTCGCGCCATCAGGTTGGTACCATGCTGCCTCCCGTAGGAGT  
GTTGGTTG GCCTCCCTCGCGCCATCAGGTTGGTTGCATGCTGCCTCCCGTAGGAGT  
GTTGTCTT GCCTCCCTCGCGCCATCAGGTTGTCTCATGCTGCCTCCCGTAGGAGT  
GTTGTGCA GCCTCCCTCGCGCCATCAGGTTGTGCACATGCTGCCTCCCGTAGGAGT  
GTTGTGGT GCCTCCCTCGCGCCATCAGGTTGTGGTCATGCTGCCTCCCGTAGGAGT

TAATCCGG GCCTCCCTCGCGCCATCAGTAATCCGGCATGCTGCCTCCCGTAGGAGT  
TAATCGCG GCCTCCCTCGCGCCATCAGTAATCGCGCATGCTGCCTCCCGTAGGAGT  
TAATCGGC GCCTCCCTCGCGCCATCAGTAATCGGGCCATGCTGCCTCCCGTAGGAGT  
TAATGCCG GCCTCCCTCGCGCCATCAGTAATGCCGCATGCTGCCTCCCGTAGGAGT  
TAATGCGC GCCTCCCTCGCGCCATCAGTAATGCGCCATGCTGCCTCCCGTAGGAGT  
TAATGGCC GCCTCCCTCGCGCCATCAGTAATGGCCCATGCTGCCTCCCGTAGGAGT  
TACCAACG GCCTCCCTCGCGCCATCAGTACCAACGCATGCTGCCTCCCGTAGGAGT  
TACCAAGC GCCTCCCTCGCGCCATCAGTACCAAGCCATGCTGCCTCCCGTAGGAGT  
TACCATCC GCCTCCCTCGCGCCATCAGTACCATCCCATGCTGCCTCCCGTAGGAGT  
TACCATGG GCCTCCCTCGCGCCATCAGTACCATGGCATGCTGCCTCCCGTAGGAGT  
TACCGCAA GCCTCCCTCGCGCCATCAGTACCGCAACATGCTGCCTCCCGTAGGAGT  
TACCGCTT GCCTCCCTCGCGCCATCAGTACCGCTTCATGCTGCCTCCCGTAGGAGT  
TACCGGAT GCCTCCCTCGCGCCATCAGTACCGGATCATGCTGCCTCCCGTAGGAGT  
TACCGGTA GCCTCCCTCGCGCCATCAGTACCGGTACATGCTGCCTCCCGTAGGAGT  
TACCTACC GCCTCCCTCGCGCCATCAGTACCTACCCATGCTGCCTCCCGTAGGAGT  
TACCTAGG GCCTCCCTCGCGCCATCAGTACCTAGGCATGCTGCCTCCCGTAGGAGT  
TACCTTCG GCCTCCCTCGCGCCATCAGTACCTTCGCATGCTGCCTCCCGTAGGAGT  
TACCTTGC GCCTCCCTCGCGCCATCAGTACCTTGCCATGCTGCCTCCCGTAGGAGT  
TACGAACC GCCTCCCTCGCGCCATCAGTACGAACCCATGCTGCCTCCCGTAGGAGT  
TACGAAGG GCCTCCCTCGCGCCATCAGTACGAAGGCATGCTGCCTCCCGTAGGAGT  
TACGATCG GCCTCCCTCGCGCCATCAGTACGATCGCATGCTGCCTCCCGTAGGAGT  
TACGATGC GCCTCCCTCGCGCCATCAGTACGATGCCATGCTGCCTCCCGTAGGAGT  
TACGCCAA GCCTCCCTCGCGCCATCAGTACGCCAACATGCTGCCTCCCGTAGGAGT  
TACGCCTT GCCTCCCTCGCGCCATCAGTACGCCTTCATGCTGCCTCCCGTAGGAGT  
TACGCGAT GCCTCCCTCGCGCCATCAGTACGCGATCATGCTGCCTCCCGTAGGAGT  
TACGCGTA GCCTCCCTCGCGCCATCAGTACGCGTACATGCTGCCTCCCGTAGGAGT  
TACGGCAT GCCTCCCTCGCGCCATCAGTACGGCATCATGCTGCCTCCCGTAGGAGT  
TACGGCTA GCCTCCCTCGCGCCATCAGTACGGTACATGCTGCCTCCCGTAGGAGT  
TACGTACG GCCTCCCTCGCGCCATCAGTACGTACGCATGCTGCCTCCCGTAGGAGT  
TACGTAGC GCCTCCCTCGCGCCATCAGTACGTAGCCATGCTGCCTCCCGTAGGAGT  
TACGTTCC GCCTCCCTCGCGCCATCAGTACGTTCCCATGCTGCCTCCCGTAGGAGT  
TACGTTGG GCCTCCCTCGCGCCATCAGTACGTTGGCATGCTGCCTCCCGTAGGAGT  
TAGCAACC GCCTCCCTCGCGCCATCAGTAGCAACCCATGCTGCCTCCCGTAGGAGT  
TAGCAAGG GCCTCCCTCGCGCCATCAGTAGCAAGGCATGCTGCCTCCCGTAGGAGT  
TAGCATCG GCCTCCCTCGCGCCATCAGTAGCATCGCATGCTGCCTCCCGTAGGAGT  
TAGCATGC GCCTCCCTCGCGCCATCAGTAGCATGCCATGCTGCCTCCCGTAGGAGT  
TAGCCGAT GCCTCCCTCGCGCCATCAGTAGCCGATCATGCTGCCTCCCGTAGGAGT  
TAGCCGTA GCCTCCCTCGCGCCATCAGTAGCCGTACATGCTGCCTCCCGTAGGAGT  
TAGCGCAT GCCTCCCTCGCGCCATCAGTAGCGCATCATGCTGCCTCCCGTAGGAGT  
TAGCGCTA GCCTCCCTCGCGCCATCAGTAGCGTACATGCTGCCTCCCGTAGGAGT  
TAGCGGAA GCCTCCCTCGCGCCATCAGTAGCGGAACATGCTGCCTCCCGTAGGAGT  
TAGCGGTT GCCTCCCTCGCGCCATCAGTAGCGGTTTCATGCTGCCTCCCGTAGGAGT  
TAGCTACG GCCTCCCTCGCGCCATCAGTAGCTACGCATGCTGCCTCCCGTAGGAGT  
TAGCTAGC GCCTCCCTCGCGCCATCAGTAGCTAGCCATGCTGCCTCCCGTAGGAGT  
TAGCTTCC GCCTCCCTCGCGCCATCAGTAGCTTCCCATGCTGCCTCCCGTAGGAGT  
TAGCTTGG GCCTCCCTCGCGCCATCAGTAGCTTGGCATGCTGCCTCCCGTAGGAGT  
TAGGAACG GCCTCCCTCGCGCCATCAGTAGGAACGCATGCTGCCTCCCGTAGGAGT  
TAGGAAGC GCCTCCCTCGCGCCATCAGTAGGAAGCCATGCTGCCTCCCGTAGGAGT  
TAGGATCC GCCTCCCTCGCGCCATCAGTAGGATCCCATGCTGCCTCCCGTAGGAGT

TAGGATGG GCCTCCCTCGCGCCATCAGTAGGATGGCATGCTGCCTCCCGTAGGAGT  
TAGGCCAT GCCTCCCTCGCGCCATCAGTAGGCCATCATGCTGCCTCCCGTAGGAGT  
TAGGCCTA GCCTCCCTCGCGCCATCAGTAGGCCCTACATGCTGCCTCCCGTAGGAGT  
TAGGCGAA GCCTCCCTCGCGCCATCAGTAGGCGAACATGCTGCCTCCCGTAGGAGT  
TAGGCGTT GCCTCCCTCGCGCCATCAGTAGGCGTTCATGCTGCCTCCCGTAGGAGT  
TAGGTACC GCCTCCCTCGCGCCATCAGTAGGTACCCATGCTGCCTCCCGTAGGAGT  
TAGGTAGG GCCTCCCTCGCGCCATCAGTAGGTAGGCATGCTGCCTCCCGTAGGAGT  
TAGGTTCG GCCTCCCTCGCGCCATCAGTAGGTTCGCATGCTGCCTCCCGTAGGAGT  
TAGGTTGC GCCTCCCTCGCGCCATCAGTAGGTTGCCATGCTGCCTCCCGTAGGAGT  
TATACCGG GCCTCCCTCGCGCCATCAGTATACCGGCATGCTGCCTCCCGTAGGAGT  
TATACGCG GCCTCCCTCGCGCCATCAGTATACGCGCATGCTGCCTCCCGTAGGAGT  
TATACGGC GCCTCCCTCGCGCCATCAGTATACGGCCATGCTGCCTCCCGTAGGAGT  
TATAGCCG GCCTCCCTCGCGCCATCAGTATAGCCGCATGCTGCCTCCCGTAGGAGT  
TATAGCGC GCCTCCCTCGCGCCATCAGTATAGCGCCATGCTGCCTCCCGTAGGAGT  
TATAGGCC GCCTCCCTCGCGCCATCAGTATAGGCCCATGCTGCCTCCCGTAGGAGT  
TATCCGCG GCCTCCCTCGCGCCATCAGTATTCCGCCATGCTGCCTCCCGTAGGAGT  
TATTCGCC GCCTCCCTCGCGCCATCAGTATTCCGCCATGCTGCCTCCCGTAGGAGT  
TATTGCGG GCCTCCCTCGCGCCATCAGTATTGCGGCATGCTGCCTCCCGTAGGAGT  
TATTGGCG GCCTCCCTCGCGCCATCAGTATTGGCGCATGCTGCCTCCCGTAGGAGT  
TCACACAG GCCTCCCTCGCGCCATCAGTCACACAGCATGCTGCCTCCCGTAGGAGT  
TCACACTC GCCTCCCTCGCGCCATCAGTCACACTCCATGCTGCCTCCCGTAGGAGT  
TCACAGAC GCCTCCCTCGCGCCATCAGTCACAGACCATGCTGCCTCCCGTAGGAGT  
TCACAGTG GCCTCCCTCGCGCCATCAGTCACAGTGCATGCTGCCTCCCGTAGGAGT  
TCACCACT GCCTCCCTCGCGCCATCAGTCACCACTCATGCTGCCTCCCGTAGGAGT  
TCACCAGA GCCTCCCTCGCGCCATCAGTCACCAGACATGCTGCCTCCCGTAGGAGT  
TCACCTCA GCCTCCCTCGCGCCATCAGTCACCTCACATGCTGCCTCCCGTAGGAGT  
TCACCTGT GCCTCCCTCGCGCCATCAGTCACCTGTCATGCTGCCTCCCGTAGGAGT  
TCACGACA GCCTCCCTCGCGCCATCAGTCACGACACATGCTGCCTCCCGTAGGAGT  
TCACGAGT GCCTCCCTCGCGCCATCAGTCACGAGTCATGCTGCCTCCCGTAGGAGT  
TCACGTCT GCCTCCCTCGCGCCATCAGTCACGTCTCATGCTGCCTCCCGTAGGAGT  
TCACGTGA GCCTCCCTCGCGCCATCAGTCACGTGACATGCTGCCTCCCGTAGGAGT  
TCACTCAC GCCTCCCTCGCGCCATCAGTCACTCACCATGCTGCCTCCCGTAGGAGT  
TCACTCTG GCCTCCCTCGCGCCATCAGTCACTCTGCATGCTGCCTCCCGTAGGAGT  
TCACTGAG GCCTCCCTCGCGCCATCAGTCACTGAGCATGCTGCCTCCCGTAGGAGT  
TCACTGTC GCCTCCCTCGCGCCATCAGTCACTGTCCATGCTGCCTCCCGTAGGAGT  
TCAGACAC GCCTCCCTCGCGCCATCAGTCAGACACCATGCTGCCTCCCGTAGGAGT  
TCAGACTG GCCTCCCTCGCGCCATCAGTCAGACTGCATGCTGCCTCCCGTAGGAGT  
TCAGAGAG GCCTCCCTCGCGCCATCAGTCAGAGAGCATGCTGCCTCCCGTAGGAGT  
TCAGAGTC GCCTCCCTCGCGCCATCAGTCAGAGTCCATGCTGCCTCCCGTAGGAGT  
TCAGACA GCCTCCCTCGCGCCATCAGTCAGACACATGCTGCCTCCCGTAGGAGT  
TCAGCAGT GCCTCCCTCGCGCCATCAGTCAGCAGTCATGCTGCCTCCCGTAGGAGT  
TCAGCTCT GCCTCCCTCGCGCCATCAGTCAGCTCTCATGCTGCCTCCCGTAGGAGT  
TCAGCTGA GCCTCCCTCGCGCCATCAGTCAGCTGACATGCTGCCTCCCGTAGGAGT  
TCAGGACT GCCTCCCTCGCGCCATCAGTCAGGACTCATGCTGCCTCCCGTAGGAGT  
TCAGGAGA GCCTCCCTCGCGCCATCAGTCAGGAGACATGCTGCCTCCCGTAGGAGT  
TCAGGTCA GCCTCCCTCGCGCCATCAGTCAGGTACATGCTGCCTCCCGTAGGAGT  
TCAGGTGT GCCTCCCTCGCGCCATCAGTCAGGTGTCATGCTGCCTCCCGTAGGAGT  
TCAGTCAG GCCTCCCTCGCGCCATCAGTCAGTCAGCATGCTGCCTCCCGTAGGAGT  
TCAGTCTC GCCTCCCTCGCGCCATCAGTCAGTCTCCATGCTGCCTCCCGTAGGAGT

TCAGTGAC GCCTCCCTCGCGCCATCAGTCAGTGACCATGCTGCCTCCCGTAGGAGT  
TCAGTGTG GCCTCCCTCGCGCCATCAGTCAGTGTGCATGCTGCCTCCCGTAGGAGT  
TCCAACCT GCCTCCCTCGCGCCATCAGTCCAACCTCATGCTGCCTCCCGTAGGAGT  
TCCAACGA GCCTCCCTCGCGCCATCAGTCCAACGACATGCTGCCTCCCGTAGGAGT  
TCCAAGCA GCCTCCCTCGCGCCATCAGTCCAAGCACATGCTGCCTCCCGTAGGAGT  
TCCAAGGT GCCTCCCTCGCGCCATCAGTCCAAGGTCATGCTGCCTCCCGTAGGAGT  
TCCACAAG GCCTCCCTCGCGCCATCAGTCCACAAGCATGCTGCCTCCCGTAGGAGT  
TCCACATC GCCTCCCTCGCGCCATCAGTCCACATCCATGCTGCCTCCCGTAGGAGT  
TCCACTAC GCCTCCCTCGCGCCATCAGTCCACTACCATGCTGCCTCCCGTAGGAGT  
TCCACTTG GCCTCCCTCGCGCCATCAGTCCACTTGCATGCTGCCTCCCGTAGGAGT  
TCCAGAAC GCCTCCCTCGCGCCATCAGTCCAGAACCATGCTGCCTCCCGTAGGAGT  
TCCAGATG GCCTCCCTCGCGCCATCAGTCCAGATGCATGCTGCCTCCCGTAGGAGT  
TCCAGTAG GCCTCCCTCGCGCCATCAGTCCAGTAGCATGCTGCCTCCCGTAGGAGT  
TCCAGTTC GCCTCCCTCGCGCCATCAGTCCAGTTCATGCTGCCTCCCGTAGGAGT  
TCCATCCA GCCTCCCTCGCGCCATCAGTCCATCCACATGCTGCCTCCCGTAGGAGT  
TCCATCGT GCCTCCCTCGCGCCATCAGTCCATCGTCATGCTGCCTCCCGTAGGAGT  
TCCATGCT GCCTCCCTCGCGCCATCAGTCCATGCTCATGCTGCCTCCCGTAGGAGT  
TCCATGGA GCCTCCCTCGCGCCATCAGTCCATGGACATGCTGCCTCCCGTAGGAGT  
TCCTACCA GCCTCCCTCGCGCCATCAGTTCCTACCACATGCTGCCTCCCGTAGGAGT  
TCCTACGT GCCTCCCTCGCGCCATCAGTTCCTACGTCATGCTGCCTCCCGTAGGAGT  
TCCTAGCT GCCTCCCTCGCGCCATCAGTTCCTAGCTCATGCTGCCTCCCGTAGGAGT  
TCCTAGGA GCCTCCCTCGCGCCATCAGTTCCTAGGACATGCTGCCTCCCGTAGGAGT  
TCCTCAAC GCCTCCCTCGCGCCATCAGTTCCTCAACCATGCTGCCTCCCGTAGGAGT  
TCCTCATG GCCTCCCTCGCGCCATCAGTTCCTCATGCATGCTGCCTCCCGTAGGAGT  
TCCTCTAG GCCTCCCTCGCGCCATCAGTTCCTCTAGCATGCTGCCTCCCGTAGGAGT  
TCCTCTTC GCCTCCCTCGCGCCATCAGTTCCTCTTCCATGCTGCCTCCCGTAGGAGT  
TCCTGAAG GCCTCCCTCGCGCCATCAGTTCCTGAAGCATGCTGCCTCCCGTAGGAGT  
TCCTGATC GCCTCCCTCGCGCCATCAGTTCCTGATCCATGCTGCCTCCCGTAGGAGT  
TCCTGTAC GCCTCCCTCGCGCCATCAGTTCCTGTACCATGCTGCCTCCCGTAGGAGT  
TCCTGTTG GCCTCCCTCGCGCCATCAGTTCCTGTTGCATGCTGCCTCCCGTAGGAGT  
TCCTTCCT GCCTCCCTCGCGCCATCAGTTCCTTCCTCATGCTGCCTCCCGTAGGAGT  
TCCTTCGA GCCTCCCTCGCGCCATCAGTTCCTTCGACATGCTGCCTCCCGTAGGAGT  
TCCTTGCA GCCTCCCTCGCGCCATCAGTTCCTTGACATGCTGCCTCCCGTAGGAGT  
TCCTTGGT GCCTCCCTCGCGCCATCAGTTCCTTGGTCATGCTGCCTCCCGTAGGAGT  
TCGAACCA GCCTCCCTCGCGCCATCAGTTCGAACCACATGCTGCCTCCCGTAGGAGT  
TCGAACGT GCCTCCCTCGCGCCATCAGTTCGAACGTCATGCTGCCTCCCGTAGGAGT  
TCGAAGCT GCCTCCCTCGCGCCATCAGTTCGAAGCTCATGCTGCCTCCCGTAGGAGT  
TCGAAGGA GCCTCCCTCGCGCCATCAGTTCGAAGGACATGCTGCCTCCCGTAGGAGT  
TCGACAAC GCCTCCCTCGCGCCATCAGTTCGACAACCATGCTGCCTCCCGTAGGAGT  
TCGACATG GCCTCCCTCGCGCCATCAGTTCGACATGCATGCTGCCTCCCGTAGGAGT  
TCGACTAG GCCTCCCTCGCGCCATCAGTTCGACTAGCATGCTGCCTCCCGTAGGAGT  
TCGACTTC GCCTCCCTCGCGCCATCAGTTCGACTTCCATGCTGCCTCCCGTAGGAGT  
TCGAGAAG GCCTCCCTCGCGCCATCAGTTCGAGAAGCATGCTGCCTCCCGTAGGAGT  
TCGAGATC GCCTCCCTCGCGCCATCAGTTCGAGATCCATGCTGCCTCCCGTAGGAGT  
TCGAGTAC GCCTCCCTCGCGCCATCAGTTCGAGTACCATGCTGCCTCCCGTAGGAGT  
TCGAGTTG GCCTCCCTCGCGCCATCAGTTCGAGTTGCATGCTGCCTCCCGTAGGAGT  
TCGATCCT GCCTCCCTCGCGCCATCAGTTCGATCCTCATGCTGCCTCCCGTAGGAGT  
TCGATCGA GCCTCCCTCGCGCCATCAGTTCGATCGACATGCTGCCTCCCGTAGGAGT  
TCGATGCA GCCTCCCTCGCGCCATCAGTTCGATGCACATGCTGCCTCCCGTAGGAGT

TCGATGGT GCCTCCCTCGCGCCATCAGTCGATGGTCATGCTGCCTCCCGTAGGAGT  
TCGTACCT GCCTCCCTCGCGCCATCAGTCGTACCTCATGCTGCCTCCCGTAGGAGT  
TCGTACGA GCCTCCCTCGCGCCATCAGTCGTACGACATGCTGCCTCCCGTAGGAGT  
TCGTAGCA GCCTCCCTCGCGCCATCAGTCGTAGCACATGCTGCCTCCCGTAGGAGT  
TCGTAGGT GCCTCCCTCGCGCCATCAGTCGTAGGTCATGCTGCCTCCCGTAGGAGT  
TCGTCAAG GCCTCCCTCGCGCCATCAGTCGTCAAGCATGCTGCCTCCCGTAGGAGT  
TCGTCATC GCCTCCCTCGCGCCATCAGTCGTATCCATGCTGCCTCCCGTAGGAGT  
TCGTCTAC GCCTCCCTCGCGCCATCAGTCGTCTACCATGCTGCCTCCCGTAGGAGT  
TCGTCTTG GCCTCCCTCGCGCCATCAGTCGTCTTGCATGCTGCCTCCCGTAGGAGT  
TCGTGAAC GCCTCCCTCGCGCCATCAGTCGTGAACCATGCTGCCTCCCGTAGGAGT  
TCGTGATG GCCTCCCTCGCGCCATCAGTCGTGATGCATGCTGCCTCCCGTAGGAGT  
TCGTGTAG GCCTCCCTCGCGCCATCAGTCGTGTAGCATGCTGCCTCCCGTAGGAGT  
TCGTGTTT GCCTCCCTCGCGCCATCAGTCGTGTTCCATGCTGCCTCCCGTAGGAGT  
TCGTTCCA GCCTCCCTCGCGCCATCAGTCGTTCACATGCTGCCTCCCGTAGGAGT  
TCGTTTCG GCCTCCCTCGCGCCATCAGTCGTTCGTCATGCTGCCTCCCGTAGGAGT  
TCGTTGCT GCCTCCCTCGCGCCATCAGTCGTTGCTCATGCTGCCTCCCGTAGGAGT  
TCGTTGGA GCCTCCCTCGCGCCATCAGTCGTTGGACATGCTGCCTCCCGTAGGAGT  
TCTCACAC GCCTCCCTCGCGCCATCAGTCTCACACCATGCTGCCTCCCGTAGGAGT  
TCTCACTG GCCTCCCTCGCGCCATCAGTCTCACTGCATGCTGCCTCCCGTAGGAGT  
TCTCAGAG GCCTCCCTCGCGCCATCAGTCTCAGAGCATGCTGCCTCCCGTAGGAGT  
TCTCAGTC GCCTCCCTCGCGCCATCAGTCTCAGTCCATGCTGCCTCCCGTAGGAGT  
TCTCCACA GCCTCCCTCGCGCCATCAGTCTCCACACATGCTGCCTCCCGTAGGAGT  
TCTCCAGT GCCTCCCTCGCGCCATCAGTCTCCAGTCATGCTGCCTCCCGTAGGAGT  
TCTCCTCT GCCTCCCTCGCGCCATCAGTCTCCTCTCATGCTGCCTCCCGTAGGAGT  
TCTCCTGA GCCTCCCTCGCGCCATCAGTCTCCTGACATGCTGCCTCCCGTAGGAGT  
TCTCGACT GCCTCCCTCGCGCCATCAGTCTCGACTCATGCTGCCTCCCGTAGGAGT  
TCTCGAGA GCCTCCCTCGCGCCATCAGTCTCGAGACATGCTGCCTCCCGTAGGAGT  
TCTCGTCA GCCTCCCTCGCGCCATCAGTCTCGTCACATGCTGCCTCCCGTAGGAGT  
TCTCGTGT GCCTCCCTCGCGCCATCAGTCTCGTGTGTCATGCTGCCTCCCGTAGGAGT  
TCTCTCAG GCCTCCCTCGCGCCATCAGTCTCTCAGCATGCTGCCTCCCGTAGGAGT  
TCTCTCTC GCCTCCCTCGCGCCATCAGTCTCTCCATGCTGCCTCCCGTAGGAGT  
TCTCTGAC GCCTCCCTCGCGCCATCAGTCTCTGACCATGCTGCCTCCCGTAGGAGT  
TCTCTGTG GCCTCCCTCGCGCCATCAGTCTCTGTGCATGCTGCCTCCCGTAGGAGT  
TCTGACAG GCCTCCCTCGCGCCATCAGTCTGACAGCATGCTGCCTCCCGTAGGAGT  
TCTGACTC GCCTCCCTCGCGCCATCAGTCTGACTCCATGCTGCCTCCCGTAGGAGT  
TCTGAGAC GCCTCCCTCGCGCCATCAGTCTGAGACCATGCTGCCTCCCGTAGGAGT  
TCTGAGTG GCCTCCCTCGCGCCATCAGTCTGAGTGCATGCTGCCTCCCGTAGGAGT  
TCTGCACT GCCTCCCTCGCGCCATCAGTCTGCACTCATGCTGCCTCCCGTAGGAGT  
TCTGCAGA GCCTCCCTCGCGCCATCAGTCTGCAGACATGCTGCCTCCCGTAGGAGT  
TCTGCTCA GCCTCCCTCGCGCCATCAGTCTGCTCACATGCTGCCTCCCGTAGGAGT  
TCTGCTGT GCCTCCCTCGCGCCATCAGTCTGCTGTGTCATGCTGCCTCCCGTAGGAGT  
TCTGGACA GCCTCCCTCGCGCCATCAGTCTGGACACATGCTGCCTCCCGTAGGAGT  
TCTGGAGT GCCTCCCTCGCGCCATCAGTCTGGAGTCATGCTGCCTCCCGTAGGAGT  
TCTGGTCT GCCTCCCTCGCGCCATCAGTCTGGTCTCATGCTGCCTCCCGTAGGAGT  
TCTGGTGA GCCTCCCTCGCGCCATCAGTCTGGTGACATGCTGCCTCCCGTAGGAGT  
TCTGTCAC GCCTCCCTCGCGCCATCAGTCTGTCACCATGCTGCCTCCCGTAGGAGT  
TCTGTCTG GCCTCCCTCGCGCCATCAGTCTGTCTGCATGCTGCCTCCCGTAGGAGT  
TCTGTGAG GCCTCCCTCGCGCCATCAGTCTGTGAGCATGCTGCCTCCCGTAGGAGT  
TCTGTGTC GCCTCCCTCGCGCCATCAGTCTGTGTCCATGCTGCCTCCCGTAGGAGT

TGACACAC GCCTCCCTCGCGCCATCAGTGACACACCATGCTGCCTCCCGTAGGAGT  
TGACTACTG GCCTCCCTCGCGCCATCAGTGACTGCATGCTGCCTCCCGTAGGAGT  
TGACAGAG GCCTCCCTCGCGCCATCAGTGACAGAGCATGCTGCCTCCCGTAGGAGT  
TGACAGTC GCCTCCCTCGCGCCATCAGTGACAGTCCATGCTGCCTCCCGTAGGAGT  
TGACCACA GCCTCCCTCGCGCCATCAGTGACCACACATGCTGCCTCCCGTAGGAGT  
TGACCAGT GCCTCCCTCGCGCCATCAGTGACCAGTCATGCTGCCTCCCGTAGGAGT  
TGACCTCT GCCTCCCTCGCGCCATCAGTGACCTCTCATGCTGCCTCCCGTAGGAGT  
TGACCTGA GCCTCCCTCGCGCCATCAGTGACCTGACATGCTGCCTCCCGTAGGAGT  
TGACGACT GCCTCCCTCGCGCCATCAGTGACGACTCATGCTGCCTCCCGTAGGAGT  
TGACGAGA GCCTCCCTCGCGCCATCAGTGACGAGACATGCTGCCTCCCGTAGGAGT  
TGACGTCA GCCTCCCTCGCGCCATCAGTGACGTACATGCTGCCTCCCGTAGGAGT  
TGACGTGT GCCTCCCTCGCGCCATCAGTGACGTGTCATGCTGCCTCCCGTAGGAGT  
TGACTCAG GCCTCCCTCGCGCCATCAGTGACTCAGCATGCTGCCTCCCGTAGGAGT  
TGACTCTC GCCTCCCTCGCGCCATCAGTGACTCTCCATGCTGCCTCCCGTAGGAGT  
TGACTGAC GCCTCCCTCGCGCCATCAGTGACTGACCATGCTGCCTCCCGTAGGAGT  
TGACTGTG GCCTCCCTCGCGCCATCAGTGACTGTGCATGCTGCCTCCCGTAGGAGT  
TGAGACAG GCCTCCCTCGCGCCATCAGTGAGACAGCATGCTGCCTCCCGTAGGAGT  
TGAGACTC GCCTCCCTCGCGCCATCAGTGAGACTCCATGCTGCCTCCCGTAGGAGT  
TGAGAGAC GCCTCCCTCGCGCCATCAGTGAGAGACCATGCTGCCTCCCGTAGGAGT  
TGAGAGTG GCCTCCCTCGCGCCATCAGTGAGAGTGCATGCTGCCTCCCGTAGGAGT  
TGAGCACT GCCTCCCTCGCGCCATCAGTGAGCACTCATGCTGCCTCCCGTAGGAGT  
TGAGCAGA GCCTCCCTCGCGCCATCAGTGAGCAGACATGCTGCCTCCCGTAGGAGT  
TGAGCTCA GCCTCCCTCGCGCCATCAGTGAGCTCACATGCTGCCTCCCGTAGGAGT  
TGAGCTGT GCCTCCCTCGCGCCATCAGTGAGCTGTCATGCTGCCTCCCGTAGGAGT  
TGAGGACA GCCTCCCTCGCGCCATCAGTGAGGACACATGCTGCCTCCCGTAGGAGT  
TGAGGAGT GCCTCCCTCGCGCCATCAGTGAGGAGTCATGCTGCCTCCCGTAGGAGT  
TGAGGTCT GCCTCCCTCGCGCCATCAGTGAGGTCTCATGCTGCCTCCCGTAGGAGT  
TGAGGTGA GCCTCCCTCGCGCCATCAGTGAGGTGACATGCTGCCTCCCGTAGGAGT  
TGAGTCAC GCCTCCCTCGCGCCATCAGTGAGTCAACATGCTGCCTCCCGTAGGAGT  
TGAGTCTG GCCTCCCTCGCGCCATCAGTGAGTCTGCATGCTGCCTCCCGTAGGAGT  
TGAGTGAG GCCTCCCTCGCGCCATCAGTGAGTGAGCATGCTGCCTCCCGTAGGAGT  
TGAGTGTC GCCTCCCTCGCGCCATCAGTGAGTGTCCATGCTGCCTCCCGTAGGAGT  
TGCAACCA GCCTCCCTCGCGCCATCAGTGCAACCACATGCTGCCTCCCGTAGGAGT  
TGCAACGT GCCTCCCTCGCGCCATCAGTGCAACGTCATGCTGCCTCCCGTAGGAGT  
TGCAAGCT GCCTCCCTCGCGCCATCAGTGCAAGCTCATGCTGCCTCCCGTAGGAGT  
TGCAAGGA GCCTCCCTCGCGCCATCAGTGCAAGGACATGCTGCCTCCCGTAGGAGT  
TGCACAAC GCCTCCCTCGCGCCATCAGTGCAACAACCATGCTGCCTCCCGTAGGAGT  
TGCACATG GCCTCCCTCGCGCCATCAGTGCACATGCATGCTGCCTCCCGTAGGAGT  
TGCACTAG GCCTCCCTCGCGCCATCAGTGCACTAGCATGCTGCCTCCCGTAGGAGT  
TGCACTTC GCCTCCCTCGCGCCATCAGTGCACTTCCATGCTGCCTCCCGTAGGAGT  
TGCAGAAG GCCTCCCTCGCGCCATCAGTGCAAGAAGCATGCTGCCTCCCGTAGGAGT  
TGCAGATC GCCTCCCTCGCGCCATCAGTGCAGATCCATGCTGCCTCCCGTAGGAGT  
TGCAGTAC GCCTCCCTCGCGCCATCAGTGCAGTACCATGCTGCCTCCCGTAGGAGT  
TGCAGTTG GCCTCCCTCGCGCCATCAGTGCAGTTGCATGCTGCCTCCCGTAGGAGT  
TGCATCCT GCCTCCCTCGCGCCATCAGTGCATCCTCATGCTGCCTCCCGTAGGAGT  
TGCATCGA GCCTCCCTCGCGCCATCAGTGCATCGACATGCTGCCTCCCGTAGGAGT  
TGCATGCA GCCTCCCTCGCGCCATCAGTGCATGCACATGCTGCCTCCCGTAGGAGT  
TGCATGGT GCCTCCCTCGCGCCATCAGTGCATGGTCATGCTGCCTCCCGTAGGAGT  
TGCTACCT GCCTCCCTCGCGCCATCAGTGCTACCTCATGCTGCCTCCCGTAGGAGT

TGCTACGA GCCTCCCTCGCGCCATCAGTGCTACGACATGCTGCCTCCCGTAGGAGT  
TGCTAGCA GCCTCCCTCGCGCCATCAGTGCTAGCACATGCTGCCTCCCGTAGGAGT  
TGCTAGGT GCCTCCCTCGCGCCATCAGTGCTAGGTCATGCTGCCTCCCGTAGGAGT  
TGCTCAAG GCCTCCCTCGCGCCATCAGTGCTCAAGCATGCTGCCTCCCGTAGGAGT  
TGCTCATC GCCTCCCTCGCGCCATCAGTGCTCATCCATGCTGCCTCCCGTAGGAGT  
TGCTCTAC GCCTCCCTCGCGCCATCAGTGCTCTACCATGCTGCCTCCCGTAGGAGT  
TGCTCTTG GCCTCCCTCGCGCCATCAGTGCTCTTGTCATGCTGCCTCCCGTAGGAGT  
TGCTGAAC GCCTCCCTCGCGCCATCAGTGCTGAACCATGCTGCCTCCCGTAGGAGT  
TGCTGATG GCCTCCCTCGCGCCATCAGTGCTGATGCATGCTGCCTCCCGTAGGAGT  
TGCTGTAG GCCTCCCTCGCGCCATCAGTGCTGTAGCATGCTGCCTCCCGTAGGAGT  
TGCTGTTC GCCTCCCTCGCGCCATCAGTGCTGTTCCATGCTGCCTCCCGTAGGAGT  
TGCTTCCA GCCTCCCTCGCGCCATCAGTGCTTCCACATGCTGCCTCCCGTAGGAGT  
TGCTTCGT GCCTCCCTCGCGCCATCAGTGCTTCGTCATGCTGCCTCCCGTAGGAGT  
TGCTTGCT GCCTCCCTCGCGCCATCAGTGCTTGCTCATGCTGCCTCCCGTAGGAGT  
TGCTTGGA GCCTCCCTCGCGCCATCAGTGCTTGACATGCTGCCTCCCGTAGGAGT  
TGGAACCT GCCTCCCTCGCGCCATCAGTGGAACCTCATGCTGCCTCCCGTAGGAGT  
TGGAACGA GCCTCCCTCGCGCCATCAGTGGAACGACATGCTGCCTCCCGTAGGAGT  
TGGAAGCA GCCTCCCTCGCGCCATCAGTGGAAGCACATGCTGCCTCCCGTAGGAGT  
TGGAAGGT GCCTCCCTCGCGCCATCAGTGGAAGGTCATGCTGCCTCCCGTAGGAGT  
TGGACAAG GCCTCCCTCGCGCCATCAGTGGACAAGCATGCTGCCTCCCGTAGGAGT  
TGGACATC GCCTCCCTCGCGCCATCAGTGGACATCCATGCTGCCTCCCGTAGGAGT  
TGGACTAC GCCTCCCTCGCGCCATCAGTGGACTACCATGCTGCCTCCCGTAGGAGT  
TGGACTTG GCCTCCCTCGCGCCATCAGTGGACTTGTCATGCTGCCTCCCGTAGGAGT  
TGGAGAAC GCCTCCCTCGCGCCATCAGTGGAGAACCATGCTGCCTCCCGTAGGAGT  
TGGAGATG GCCTCCCTCGCGCCATCAGTGGAGATGCATGCTGCCTCCCGTAGGAGT  
TGGAGTAG GCCTCCCTCGCGCCATCAGTGGAGTAGCATGCTGCCTCCCGTAGGAGT  
TGGAGTTC GCCTCCCTCGCGCCATCAGTGGAGTTCATGCTGCCTCCCGTAGGAGT  
TGGATCCA GCCTCCCTCGCGCCATCAGTGGATCCACATGCTGCCTCCCGTAGGAGT  
TGGATCGT GCCTCCCTCGCGCCATCAGTGGATCGTCATGCTGCCTCCCGTAGGAGT  
TGGATGCT GCCTCCCTCGCGCCATCAGTGGATGCTCATGCTGCCTCCCGTAGGAGT  
TGGATGGA GCCTCCCTCGCGCCATCAGTGGATGGACATGCTGCCTCCCGTAGGAGT  
TGGTACCA GCCTCCCTCGCGCCATCAGTGGTACCACATGCTGCCTCCCGTAGGAGT  
TGGTACGT GCCTCCCTCGCGCCATCAGTGGTACGTCATGCTGCCTCCCGTAGGAGT  
TGGTAGCT GCCTCCCTCGCGCCATCAGTGGTAGCTCATGCTGCCTCCCGTAGGAGT  
TGGTAGGA GCCTCCCTCGCGCCATCAGTGGTAGGACATGCTGCCTCCCGTAGGAGT  
TGGTCAAC GCCTCCCTCGCGCCATCAGTGGTCAACCATGCTGCCTCCCGTAGGAGT  
TGGTCATG GCCTCCCTCGCGCCATCAGTGGTCATGCATGCTGCCTCCCGTAGGAGT  
TGGTCTAG GCCTCCCTCGCGCCATCAGTGGTCTAGCATGCTGCCTCCCGTAGGAGT  
TGGTCTTC GCCTCCCTCGCGCCATCAGTGGTCTTCCATGCTGCCTCCCGTAGGAGT  
TGGTGAAG GCCTCCCTCGCGCCATCAGTGGTGAAGCATGCTGCCTCCCGTAGGAGT  
TGGTGATC GCCTCCCTCGCGCCATCAGTGGTGATCCATGCTGCCTCCCGTAGGAGT  
TGGTGATC GCCTCCCTCGCGCCATCAGTGGTGATCCATGCTGCCTCCCGTAGGAGT  
TGGTGTTG GCCTCCCTCGCGCCATCAGTGGTGTTGCATGCTGCCTCCCGTAGGAGT  
TGGTTCCT GCCTCCCTCGCGCCATCAGTGGTTCCTCATGCTGCCTCCCGTAGGAGT  
TGGTTCGA GCCTCCCTCGCGCCATCAGTGGTTCGACATGCTGCCTCCCGTAGGAGT  
TGGTTGCA GCCTCCCTCGCGCCATCAGTGGTTGCACATGCTGCCTCCCGTAGGAGT  
TGGTTGGT GCCTCCCTCGCGCCATCAGTGGTTGGTCATGCTGCCTCCCGTAGGAGT  
TGTCACAG GCCTCCCTCGCGCCATCAGTGTCACAGCATGCTGCCTCCCGTAGGAGT  
TGCTACTC GCCTCCCTCGCGCCATCAGTGTCACTCCATGCTGCCTCCCGTAGGAGT



TGTCAGAC GCCTCCCTCGCGCCATCAGTGTGTCAGACCATGCTGCCTCCCGTAGGAGT  
TGTCAGTG GCCTCCCTCGCGCCATCAGTGTGTCAGTGCATGCTGCCTCCCGTAGGAGT  
TGTCCTCA GCCTCCCTCGCGCCATCAGTGTCCACTCATGCTGCCTCCCGTAGGAGT  
TGTCCTGT GCCTCCCTCGCGCCATCAGTGTCCAGACATGCTGCCTCCCGTAGGAGT  
TGTCGACA GCCTCCCTCGCGCCATCAGTGTGACACATGCTGCCTCCCGTAGGAGT  
TGTCGAGT GCCTCCCTCGCGCCATCAGTGTGAGTCATGCTGCCTCCCGTAGGAGT  
TGTCGTCT GCCTCCCTCGCGCCATCAGTGTGCTCTCATGCTGCCTCCCGTAGGAGT  
TGTCGTGA GCCTCCCTCGCGCCATCAGTGTGCTGACATGCTGCCTCCCGTAGGAGT  
TGTCTCAC GCCTCCCTCGCGCCATCAGTGTCTCACCATGCTGCCTCCCGTAGGAGT  
TGTCTCTG GCCTCCCTCGCGCCATCAGTGTCTCTGCATGCTGCCTCCCGTAGGAGT  
TGTCTGAG GCCTCCCTCGCGCCATCAGTGTCTGAGCATGCTGCCTCCCGTAGGAGT  
TGTCTGTC GCCTCCCTCGCGCCATCAGTGTCTGTCCATGCTGCCTCCCGTAGGAGT  
TGTGACAC GCCTCCCTCGCGCCATCAGTGTGACACCATGCTGCCTCCCGTAGGAGT  
TGTGACTG GCCTCCCTCGCGCCATCAGTGTGACTGCATGCTGCCTCCCGTAGGAGT  
TGTGAGAG GCCTCCCTCGCGCCATCAGTGTGAGAGCATGCTGCCTCCCGTAGGAGT  
TGTGAGTC GCCTCCCTCGCGCCATCAGTGTGAGTCCATGCTGCCTCCCGTAGGAGT  
TGTGCACA GCCTCCCTCGCGCCATCAGTGTGCACACATGCTGCCTCCCGTAGGAGT  
TGTGCAGT GCCTCCCTCGCGCCATCAGTGTGCAGTCATGCTGCCTCCCGTAGGAGT  
TGTGCTCT GCCTCCCTCGCGCCATCAGTGTGCTCTCATGCTGCCTCCCGTAGGAGT  
TGTGCTGA GCCTCCCTCGCGCCATCAGTGTGCTGACATGCTGCCTCCCGTAGGAGT  
TGTGGACT GCCTCCCTCGCGCCATCAGTGTGGACTCATGCTGCCTCCCGTAGGAGT  
TGTGGAGA GCCTCCCTCGCGCCATCAGTGTGGAGACATGCTGCCTCCCGTAGGAGT  
TGTGGTCA GCCTCCCTCGCGCCATCAGTGTGGTACATGCTGCCTCCCGTAGGAGT  
TGTGGTGT GCCTCCCTCGCGCCATCAGTGTGGTGTGTCATGCTGCCTCCCGTAGGAGT  
TGTGTCAG GCCTCCCTCGCGCCATCAGTGTGTCAGCATGCTGCCTCCCGTAGGAGT  
TGTGTCTC GCCTCCCTCGCGCCATCAGTGTGTCTCCATGCTGCCTCCCGTAGGAGT  
TGTGTGAC GCCTCCCTCGCGCCATCAGTGTGTGACCATGCTGCCTCCCGTAGGAGT  
TGTGTGTG GCCTCCCTCGCGCCATCAGTGTGTGTGTCATGCTGCCTCCCGTAGGAGT  
TTAACCGG GCCTCCCTCGCGCCATCAGTTAACCGGCATGCTGCCTCCCGTAGGAGT  
TTAACGCG GCCTCCCTCGCGCCATCAGTTAACGCGCATGCTGCCTCCCGTAGGAGT  
TTAACGGC GCCTCCCTCGCGCCATCAGTTAACGGCCATGCTGCCTCCCGTAGGAGT  
TTAAGCCG GCCTCCCTCGCGCCATCAGTTAAGCCGCATGCTGCCTCCCGTAGGAGT  
TTAAGCGC GCCTCCCTCGCGCCATCAGTTAAGCGCCATGCTGCCTCCCGTAGGAGT  
TTAAGGCC GCCTCCCTCGCGCCATCAGTTAAGGCCCATGCTGCCTCCCGTAGGAGT  
TTATCCGC GCCTCCCTCGCGCCATCAGTTATCCGCCATGCTGCCTCCCGTAGGAGT  
TTATCGCC GCCTCCCTCGCGCCATCAGTTATCGCCCATGCTGCCTCCCGTAGGAGT  
TTATGCGG GCCTCCCTCGCGCCATCAGTTATGCGGCATGCTGCCTCCCGTAGGAGT  
TTATGGCG GCCTCCCTCGCGCCATCAGTTATGGCGCATGCTGCCTCCCGTAGGAGT  
TTCAACC GCCTCCCTCGCGCCATCAGTTCAACCCATGCTGCCTCCCGTAGGAGT  
TTCAAGG GCCTCCCTCGCGCCATCAGTTCAAGGCATGCTGCCTCCCGTAGGAGT  
TTCCATCG GCCTCCCTCGCGCCATCAGTTCCATCGCATGCTGCCTCCCGTAGGAGT  
TTCCATGC GCCTCCCTCGCGCCATCAGTTCCATGCCATGCTGCCTCCCGTAGGAGT  
TTCCGCAT GCCTCCCTCGCGCCATCAGTTCCGCATCATGCTGCCTCCCGTAGGAGT  
TTCCGCTA GCCTCCCTCGCGCCATCAGTTCCGCTACATGCTGCCTCCCGTAGGAGT  
TTCCGGAA GCCTCCCTCGCGCCATCAGTTCCGGAACATGCTGCCTCCCGTAGGAGT  
TTCCGGTT GCCTCCCTCGCGCCATCAGTTCCGGTTCATGCTGCCTCCCGTAGGAGT  
TTCCTACG GCCTCCCTCGCGCCATCAGTTCTACGCATGCTGCCTCCCGTAGGAGT

TTCCTAGC GCCTCCCTCGCGCCATCAGTTCCTAGCCATGCTGCCTCCCGTAGGAGT  
TTCCTTCC GCCTCCCTCGCGCCATCAGTTCCTTCCCATGCTGCCTCCCGTAGGAGT  
TTCCTTGG GCCTCCCTCGCGCCATCAGTTCCTTGGCATGCTGCCTCCCGTAGGAGT  
TTCGAACG GCCTCCCTCGCGCCATCAGTTCGAACGCATGCTGCCTCCCGTAGGAGT  
TTCGAAGC GCCTCCCTCGCGCCATCAGTTCGAAGCCATGCTGCCTCCCGTAGGAGT  
TTCGATCC GCCTCCCTCGCGCCATCAGTTCGATCCCATGCTGCCTCCCGTAGGAGT  
TTCGATGG GCCTCCCTCGCGCCATCAGTTCGATGGCATGCTGCCTCCCGTAGGAGT  
TTCGCCAT GCCTCCCTCGCGCCATCAGTTCGCCATCATGCTGCCTCCCGTAGGAGT  
TTCGCCTA GCCTCCCTCGCGCCATCAGTTCGCCTACATGCTGCCTCCCGTAGGAGT  
TTCGCGAA GCCTCCCTCGCGCCATCAGTTCGCGAACATGCTGCCTCCCGTAGGAGT  
TTCGCGTT GCCTCCCTCGCGCCATCAGTTCGCGTTCATGCTGCCTCCCGTAGGAGT  
TTCGGCAA GCCTCCCTCGCGCCATCAGTTCGGCAACATGCTGCCTCCCGTAGGAGT  
TTCGGCTT GCCTCCCTCGCGCCATCAGTTCGGCTTCATGCTGCCTCCCGTAGGAGT  
TTCGTACC GCCTCCCTCGCGCCATCAGTTCGTACCCATGCTGCCTCCCGTAGGAGT  
TTCGTAGG GCCTCCCTCGCGCCATCAGTTCGTAGGCATGCTGCCTCCCGTAGGAGT  
TTCGTTCC GCCTCCCTCGCGCCATCAGTTCGTTCCATGCTGCCTCCCGTAGGAGT  
TTCGTTGC GCCTCCCTCGCGCCATCAGTTCGTTGCCATGCTGCCTCCCGTAGGAGT  
TTGCAACG GCCTCCCTCGCGCCATCAGTTGCAACGCATGCTGCCTCCCGTAGGAGT  
TTGCAAGC GCCTCCCTCGCGCCATCAGTTGCAAGCCATGCTGCCTCCCGTAGGAGT  
TTGCATCC GCCTCCCTCGCGCCATCAGTTGCATCCCATGCTGCCTCCCGTAGGAGT  
TTGCATGG GCCTCCCTCGCGCCATCAGTTGCATGGCATGCTGCCTCCCGTAGGAGT  
TTGCCGAA GCCTCCCTCGCGCCATCAGTTGCCGAACATGCTGCCTCCCGTAGGAGT  
TTGCCGTT GCCTCCCTCGCGCCATCAGTTGCCGTTTCATGCTGCCTCCCGTAGGAGT  
TTGCGCAA GCCTCCCTCGCGCCATCAGTTGCGCAACATGCTGCCTCCCGTAGGAGT  
TTGCGCTT GCCTCCCTCGCGCCATCAGTTGCGCTTCATGCTGCCTCCCGTAGGAGT  
TTGCGGAT GCCTCCCTCGCGCCATCAGTTGCGGATCATGCTGCCTCCCGTAGGAGT  
TTGCGGTA GCCTCCCTCGCGCCATCAGTTGCGGTACATGCTGCCTCCCGTAGGAGT  
TTGCTACC GCCTCCCTCGCGCCATCAGTTGCTACCCATGCTGCCTCCCGTAGGAGT  
TTGCTAGG GCCTCCCTCGCGCCATCAGTTGCTAGGCATGCTGCCTCCCGTAGGAGT  
TTGCTTCG GCCTCCCTCGCGCCATCAGTTGCTTCGCATGCTGCCTCCCGTAGGAGT  
TTGCTTGC GCCTCCCTCGCGCCATCAGTTGCTTGCCATGCTGCCTCCCGTAGGAGT  
TTGGAACC GCCTCCCTCGCGCCATCAGTTGGAACCCATGCTGCCTCCCGTAGGAGT  
TTGGAAGG GCCTCCCTCGCGCCATCAGTTGGAAGGCATGCTGCCTCCCGTAGGAGT  
TTGGATCG GCCTCCCTCGCGCCATCAGTTGGATCGCATGCTGCCTCCCGTAGGAGT  
TTGGATGC GCCTCCCTCGCGCCATCAGTTGGATGCCATGCTGCCTCCCGTAGGAGT  
TTGGCCAA GCCTCCCTCGCGCCATCAGTTGGCCAACATGCTGCCTCCCGTAGGAGT  
TTGGCCTT GCCTCCCTCGCGCCATCAGTTGGCCTTCATGCTGCCTCCCGTAGGAGT  
TTGGCGAT GCCTCCCTCGCGCCATCAGTTGGCGATCATGCTGCCTCCCGTAGGAGT  
TTGGCGTA GCCTCCCTCGCGCCATCAGTTGGCGTACATGCTGCCTCCCGTAGGAGT  
TTGGTACG GCCTCCCTCGCGCCATCAGTTGGTACGCATGCTGCCTCCCGTAGGAGT  
TTGGTAGC GCCTCCCTCGCGCCATCAGTTGGTAGCCATGCTGCCTCCCGTAGGAGT  
TTGGTTCC GCCTCCCTCGCGCCATCAGTTGGTTCCCATGCTGCCTCCCGTAGGAGT  
TTGGTTGG GCCTCCCTCGCGCCATCAGTTGGTTGGCATGCTGCCTCCCGTAGGAGT

## Supplementary Methods

### Processing 454 reads

Sequences were processed according to the recommendations in ref. 1:

1. Examine the distribution of read lengths, and look for the major peak. We dropped sequences shorter than 237 nt or longer than 283 nt, which were approximately +/- 2 standard deviations from the mean of the major peak. This step was performed manually, by inspection of the histogram.
2. Drop reads with an average quality score less than 25.
3. Drop reads that contained any ambiguous characters.
4. Split sequence read: first 8 nt provide the barcode (“prefix”). The remainder of the sequence (“suffix”) is used for downstream analyses.
5. Drop sequences where the suffix does not start with the linker and primer sequence CATGCTGCCTCCCGTAGGAGT.
6. Check whether the barcode is present in the list of valid barcodes:
  - a. If valid, remap to original sample id, assign unique sequence id to the read.
  - b. If not, try to correct barcode using the Hamming decoder.
    - i. If corrected, remap to original sample id, assign unique sequence id to the read, and record the position and type of the error.
    - ii. If not corrected, drop sequence.

### OTU Picking Algorithm

OTUs were chosen using the following algorithm:

1. Identify similar sequences using megablast<sup>2</sup>. Parameters: E-value 1e-8, minimum coverage 99%, minimum pairwise identity 96%.
2. Find sets of sequences that are connected to one another using BLAST hits at this level.
3. Choose OTUs as follows:
  - a. Connected components are candidate OTUs.
  - b. The candidate OTU is considered valid if the average density of connections is above 70% (i.e. if 70% of the possible pairwise connections between sequences in the set exist). If the density is lower than this, split up connected component by picking a connected subgraph where the density is above threshold, until no sequences remain in the connected component.
4. A representative sequence was chosen from each OTU by selecting the sequence with the largest number of hits to other sequences in the OTU. Ties were broken by choosing one of the longest sequences within the OTU at random.

### NAST alignment and Lane mask

1. The representative set of sequences was aligned using NAST<sup>3</sup> with the following parameters:
  - a. Minimum alignment length of 200, and 70% sequence identity.
  - b. The template used was the “core\_set\_aligned.fasta.imputed” as posted 11/8/2007 ([http://greengenes.lbl.gov/Download/Sequence\\_Data/Fasta\\_data\\_files/](http://greengenes.lbl.gov/Download/Sequence_Data/Fasta_data_files/)).
2. The file PH\_lanemask, as posted 18/7/2007 ([http://greengenes.lbl.gov/Download/Sequence\\_Data/lanemask\\_in\\_1s\\_and\\_0s](http://greengenes.lbl.gov/Download/Sequence_Data/lanemask_in_1s_and_0s)), was used to screen out hypervariable regions of the sequence.

### **Tree building and UniFrac clustering**

1. A relaxed neighbor-joining tree was built using clearcut<sup>4</sup>, using the Kimura correction but otherwise with default comparisons.
2. Unweighted UniFrac<sup>5,6</sup> was run using the resulting tree and the counts of each sequence in each environment.

### **Taxonomy assignment**

1. Taxonomy was assigned using the best BLAST<sup>7</sup> hit against Greengenes<sup>8</sup>, using an E-value cutoff of 1e-10, and the Hugenholtz taxonomy.

### **Source code and all valid barcodes**

Source code and a complete list of valid barcodes are provided in Supplementary Data 1-2.

### **References**

1. S. M. Huse, J. A. Huber, H. G. Morrison, M. L. Sogin, and D. M. Welch, *Genome Biol* **8** (7), R143 (2007).
2. S. McGinnis and T. L. Madden, *Nucleic Acids Res* **32** (Web Server issue), W20 (2004).
3. T. Z. DeSantis, Jr., P. Hugenholtz, K. Keller, E. L. Brodie, N. Larsen *et al.*, *Nucleic Acids Res* **34** (Web Server issue), W394 (2006).
4. L. Sheneman, J. Evans, and J. A. Foster, *Bioinformatics* **22** (22), 2823 (2006).
5. C. Lozupone and R. Knight, *Appl Environ Microbiol* **71** (12), 8228 (2005).
6. C. Lozupone, M. Hamady, and R. Knight, *BMC Bioinformatics* **7**, 371 (2006).
7. S. F. Altschul, W. Gish, W. Miller, E. W. Myers, and D. J. Lipman, *J Mol Biol* **215** (3), 403 (1990).
8. T. Z. DeSantis, P. Hugenholtz, N. Larsen, M. Rojas, E. L. Brodie *et al.*, *Appl Environ Microbiol* **72** (7), 5069 (2006).
